# Supplementary material for: Tryptophan association in water driven by charge-transfer interactions with electron-deficient aromatic haptens
Source: Royal Society of Chemistry journal article supplement (doi:10.1039/d2ob01650h), 2022-01-01
Supplement: d2ob01650h1.pdf [file d2ob01650h1.pdf]

## Supporting Information

# **Tryptophan association in water driven by charge-transfer interactions with electron-deficient aromatic haptens**

Estela Sánchez-Santos,<sup>a</sup> José J. Garrido-González,<sup>a</sup> Ligzajaya F. Rodríguez,<sup>a</sup> Asmaa Habib,<sup>a</sup> Ángel L. Fuentes de Arriba,<sup>a</sup> Francisca Sanz,<sup>b</sup> Eva M. Martín del Valle,<sup>c</sup> Joaquín R. Morán<sup>\*a</sup> and Victoria Alcázar<sup>\*d</sup>

## Table of Contents

|                                                                                                              |     |
|--------------------------------------------------------------------------------------------------------------|-----|
| 1. General information                                                                                       | S4  |
| 2. Synthesis and characterization                                                                            | S7  |
| 2.1. Synthesis of receptors                                                                                  | S7  |
| ▪ Sodium 2,4,6-trinitrobenzene sulfonate ( <b>3b</b> ) and 2,4,6-trinitrobenzene sulfonic acid ( <b>3a</b> ) | S7  |
| ▪ 2,4,6-trinitrobenzoic acid ( <b>5a</b> )                                                                   | S7  |
| ▪ <i>N,N'</i> -bis(glyciny)pyromellitic diimide ( <b>6a</b> )                                                | S7  |
| 2.2. Synthesis of Trp-Gly-Trp ( <b>10</b> )                                                                  | S7  |
| ▪ <i>N</i> -Fmoc-Trp-Gly-OtBu ( <b>7</b> )                                                                   | S7  |
| ▪ <i>N</i> -Fmoc-Trp-Gly-OH ( <b>8</b> )                                                                     | S8  |
| ▪ <i>N</i> -Fmoc-Trp-Gly-Trp-OMe ( <b>9</b> )                                                                | S8  |
| ▪ Trp-Gly-Trp ( <b>10</b> )                                                                                  | S9  |
| 2.3. <sup>1</sup> H NMR, <sup>13</sup> C NMR and Mass spectra                                                | S10 |
| 3. Crystallographic studies                                                                                  | S27 |
| 3.1. 2,4,6-trinitrobenzene sulfonic acid ( <b>3a</b> ) with L-tryptophan                                     | S27 |
| 3.2. 3,5-dinitrobenzoic acid ( <b>4a</b> ) with L-tryptophan                                                 | S32 |
| 3.3. 2,4,6-trinitrobenzoic acid ( <b>5a</b> ) with L-tryptophan                                              | S37 |
| 3.4. <i>N,N'</i> -bis(glyciny)pyromellitic diimide ( <b>6a</b> ) with L-tryptophan                           | S41 |
| 4. UV-vis studies with Trp                                                                                   | S46 |
| 4.1. Sodium 2,4,6-trinitrobenzene sulfonate ( <b>3b</b> )                                                    | S46 |
| 4.2. 3,5-dinitrobenzoic acid ( <b>4a</b> )                                                                   | S48 |
| 4.3. 2,4,6-trinitrobenzoic acid ( <b>5a</b> )                                                                | S48 |
| 4.4. <i>N,N'</i> -bis(glyciny)pyromellitic diimide ( <b>6a</b> )                                             | S49 |
| 5. NMR titrations with Trp                                                                                   | S50 |
| 5.1. Picric acid ( <b>1</b> )                                                                                | S50 |
| 5.2. Sodium 2,4,6-trinitrobenzene sulfonate ( <b>3b</b> )                                                    | S52 |
| 5.3. 3,5-dinitrobenzoic acid ( <b>4a</b> )                                                                   | S54 |
| 5.4. Lithium 3,5-dinitrobenzoate ( <b>4b</b> )                                                               | S56 |
| 5.5. 2,4,6-trinitrobenzoic acid ( <b>5a</b> )                                                                | S57 |
| 5.6. Lithium 2,4,6-trinitrobenzoate ( <b>5b</b> )                                                            | S59 |
| 5.7. Diimide ( <b>6b</b> )                                                                                   | S60 |
| 6. Tripeptide Trp-Gly-Trp ( <b>10</b> )                                                                      | S63 |
| 6.1. UV-vis titration in D <sub>2</sub> O with diimide <b>6b</b>                                             | S63 |
| 6.2. NMR titration in D <sub>2</sub> O with diimide <b>6b</b>                                                | S65 |
| 6.3. 2D NMR studies complexes <b>6b:10</b> in D <sub>2</sub> O                                               | S71 |
| 6.4. NMR titration in DMSO( <i>d</i> <sub>6</sub> ) with diimide <b>6a</b>                                   | S76 |

|                                                                             |     |
|-----------------------------------------------------------------------------|-----|
| 6.5. 2D NMR studies complexes <b>6a:10</b> in DMSO( <i>d</i> <sub>6</sub> ) | S79 |
| 7. Modelling studies                                                        | S83 |
| 8 References                                                                | S84 |
| 9. UV-vis data                                                              | S86 |

## 1. General information

### Reagents

Reagents were purchased and used without further purification unless otherwise noted. The solvents used were purified and dried following the standard methods. [1]

### Purification of reaction crudes

Reactions were monitored by analytical thin layer chromatography using pre-coated aluminium-backed plates (0.2 mm silica gel 60 F254, Merck®) and visualized by UV light. Purification of compounds was performed using silica gel column chromatography (Chromagel 60A SdS. C.C. 70-200 µm) with solvent mixtures of increasing polarity as eluents and crystallization using different solvent mixtures.

### Melting Points (m.p.)

Melting points were measured in a Leica Galen III microscope and are reported in °C.

### IR spectroscopy

IR spectra were recorded using a Nicolet IR100 with Nujol as a suspension.

### UV-vis spectrometry

UV-vis spectra were recorded on a UNICAM (Helios) spectrophotometer.

### pH

pH was measured using the pH-meter Crison Basic 20.

### NMR spectroscopy

<sup>1</sup>H and <sup>13</sup>C NMR spectra were recorded at room temperature using Bruker models WP-200-SY, Varian 200 Mercury VS 2000 (200 MHz to <sup>1</sup>H and 50 MHz to <sup>13</sup>C) and Bruker Advance NEO 400 MHz with a Prodigy CPPBBO BB-H&F z-gradient cryo-probe (400 MHz to <sup>1</sup>H and 100 MHz to <sup>13</sup>C) spectrometers. Chemical shifts were reported in ppm with the solvent signal (<sup>1</sup>H/<sup>13</sup>C: deuterated chloroform CDCl<sub>3</sub> 7.26/77.2 ppm, dimethylsulfoxide DMSO-*d*<sub>6</sub> 2.50/39.5 ppm or water D<sub>2</sub>O-*d*<sub>2</sub> 4.79 ppm) and tetramethylsilane (TMS 0.00 ppm) as an internal standard using reported shifts. [2] Coupling constants (*J*) were reported in Hertz (Hz). The following abbreviations were used to explain the multiplicities: s, singlet; d, doublet; dd, doublet of doublets; t, triplet; q, quartet; quin, quintet; sext, sextet; m, multiplet; br, broad.

### Mass spectrometry

Mass spectra were recorded on a quadrupole-TOF Applied Biosystems QSTAR XL and Waters ZQ 4000 spectrometers using electrospray ionization (ESI) or electronic impact (EI).

## X-ray diffraction studies

- *Procedure for the single crystal preparation*

Single crystals suitable for X-ray diffraction measurements were obtained by slowly evaporating solutions of stoichiometric mixtures of L-tryptophan and the receptor (**3**, **4**, **5** or **6**). 30 mg of L-tryptophan (0.15 mmol) and the equimolar amount of the corresponding receptor were dissolved in 2.5 mL of a water/methanol or water/THF mixture in a clean and dry 10 mL glass vial. The mouth of the glass vial was covered with a cap having a small hole and kept it for slow evaporation at room temperature. At the end of the process, single crystals were obtained after around 5-6 days.

- *X-Ray Crystallography*

Suitable single crystals of complexes of L-tryptophan with receptors **3**, **4**, **5** and **6** were mounted on glass fibre for data collection on a Bruker Kappa APEX II diffractometer. Data were collected at 298(2) K using Cu K $\alpha$  radiation ( $\lambda = 1.54178$  Å) and  $\omega$  scan technique, and were corrected for Lorentz and polarization effects. The detector was placed at a distance of approximately 37.5 mm from the crystal.

A series of narrow frames of data were collected with a scan width of 0.5° in  $\omega$  and an exposure time of 10 s per frame. The data were integrated with SAINT [3] to a resolution of 0.78 Å using a narrow-frame algorithm. Data were corrected for absorption effects using the multi-scan method using SADABS. [4]

Subsequent structure solution and refinement were carried out with SHELXT and SHELXL, respectively. [5, 6] The structures were solved by direct methods combined with difference Fourier synthesis and refined by full-matrix least-squares procedures, with anisotropic thermal parameters in the last cycles of refinement for all non-hydrogen atoms. The refinement was based on  $F^2$  for all reflections, weighted R factors ( $wR$ ) and goodness-of-fit (GoF) values are based on  $F^2$ , while conventional R factors (R) are based on F. The  $F_o^2 > 2\sigma(F_o^2)$  criterion was used only for calculating R factors and it is not relevant to the choice of reflections for the refinement. The R factors based on  $F^2$  are about twice as large as those based on F. Scattering factors were taken from the International Tables for Crystallography. [7]

Hydrogen atom positions were calculated by geometrical methods and refined as a riding model. Complex of L-tryptophan and 2,4,6-trinitrobenzene sulfonic acid (**3**) crystallizes with three molecules of water. Complex of L-tryptophan and 3,5-dinitrobenzoic acid (**4**) crystallizes with one methanol solvent molecule in the asymmetric unit. Complex of L-tryptophan and *N,N'*-bis(glyciny)pyromellitic diimide (**6**) crystallizes with two water solvent molecules; it should be noticed that hydrogen atoms of water molecules are not shown in the structural formula of the complex, as they were not located by X-ray diffraction.

Mercury 4.2.0 program was used for analysis and molecular and crystal structure drawings preparation. [8]

The CCDC numbers assigned for the crystal structures are: 2179406 (complex Trp-2,4,6-trinitrobenzene sulfonic acid), 2179399 (complex Trp-3,5-dinitrobenzoic acid), 2179404 (complex Trp-2,4,6-trinitrobenzoic acid) and 2179405 (complex Trp- *N,N'*-bis(glyciny)pyromellitic diimide).

## <sup>1</sup>H NMR titration experiments

A typical procedure for  $^1\text{H}$  NMR titrations is described. A solution of the receptor (5 mM, 1.5 mL) in  $\text{H}_2\text{O}$  or  $\text{DMSO-}d_6$  was prepared and a volume of 500  $\mu\text{L}$  was added to a standard NMR tube. The  $^1\text{H}$  NMR spectrum of the sample was collected at 298 K. A solution of the guest (0.05 M) was prepared by dissolving the required amount of guest in the remaining solution (1.0 mL) of receptor. Aliquots of this solution were then added to the NMR tube, mixing well after each addition, and recording the corresponding  $^1\text{H}$  NMR spectrum. The concentration of the receptor was thus kept constant during the titration as the guest solution also contained the receptor at its initial concentration. During the course of the titration, some of the proton signals of the receptor are shifted and these chemical shifts ( $\delta$  ppm) were plotted against the ratio of concentrations  $[\text{Guest}]/[\text{Host}]$ . Data were fitted using the online fitting tool Bindfit. [9] Dioxane was used as internal standard.

#### UV-vis titration experiments

A typical procedure for UV-vis titrations is described. Two stock solutions (30 mM, 10 mL) in  $\text{H}_2\text{O}$  of receptor and guest were prepared. For the UV-vis titration experiments, samples were prepared adding 1.0 mL of the stock solution of the receptor (30 mM) in the optical cell and diluting three times to a final host concentration 10 mM. The 2.0 mL added volume comes from mixing calculated volumes of water and guest stock solution, to achieve different ratio of concentrations  $[\text{Guest}]/[\text{Host}]$ . Thus, the concentration of the receptor was kept constant during the titration (10mM) while the concentration of the guest was gradually increased. Data were fitted using the online fitting tool Bindfit. [9]

#### Modelling studies

Theoretical studies were carried out using GAMESS interface for Chem3D 19.1 software [10] using the semiempirical method AM1 and theoretical Hartree-Fock.

## 2. Synthesis and Characterization

### 2.1. Synthesis of receptors

#### ▪ Sodium 2,4,6-trinitrobenzene sulfonate (**3b**) and 2,4,6-trinitrobenzene sulfonic acid (**3a**)

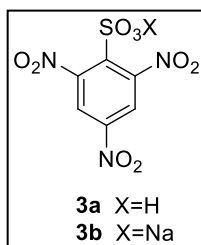

These compounds were prepared according to published literature. [11]. Anhydrous sodium bisulfite (1.0 g, 7.9 mmol) was added to a solution of 2-chloro-1,3,5-trinitrobenzene (1.0 g, 4.0 mmol) in 10 mL of absolute ethanol and refluxed for 8 h. The reaction mixture was then filtered under vacuum, the salts were discarded, and the filtrate was evaporated and crystallized from methanol yielding compound **3b** (1.1 g; 87%) as orange crystals. 2,4,6-trinitrobenzene sulfonic acid (**3a**) was obtained when **3b** was dissolved in hot concentrated HCl. The precipitate formed immediately upon cooling was removed and **3b** was obtained as white crystals after 2 hours in the cold.

#### ▪ 2,4,6-trinitrobenzoic acid (**5a**)

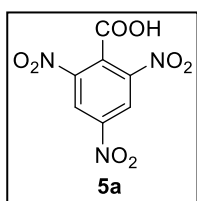

A suspension of 2,4,6-trinitrotoluene (4.0 g, 18 mmol), boric acid (0.2 g, 3.2 mmol) and 98% sulfuric acid (20 mL) was mixed in a two-necked flask equipped with a magnetic stirrer and a thermometer and was heated at 45 °C in a closed system. After the suspension became homogenous, CrO<sub>3</sub> (5.0 g, 50 mmol) was gradually added for one hour and the mixture was maintained at that temperature for 2 h. The reaction mixture was then poured in an Erlenmeyer flask with ice and filtered, yielding compound **5a** (3.5 g, 75%). The spectroscopic properties of compound **5** were in agreement with the published data. [12]

#### ▪ *N,N'*-bis(glyciny)pyromellitic diimide (**6a**)

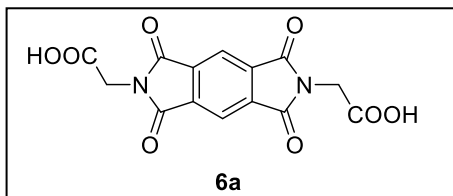

Freshly sublimed 1,2,4,5-benzenetetracarboxylic acid anhydride (1.0 g, 4.6 mmol) and glycine (1.0 g, 13 mmol) were dissolved in 20 mL of acetic acid under reflux. After refluxing the solution for 90 minutes, the reaction mixture was added over 10 mL of water and the resulting precipitate was filtered off affording compound **6a** (1.5 g, 98%) as a white solid whose spectroscopic properties were in agreement with the published data. [13]

### 2.2. Synthesis of Trp-Gly-Trp (**10**)

#### ▪ *N*-Fmoc-Trp-Gly-OtBu (**7**)

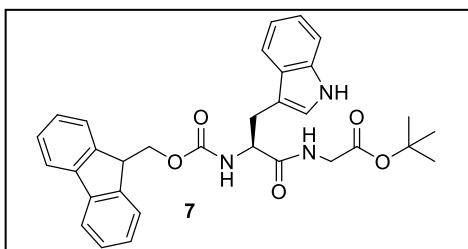

Fmoc-Trp-OH (1.0 g, 2.3 mmol) and Gly-OtBu • HCl (393 mg, 2.3 mmol) were suspended in 20 mL of CH<sub>2</sub>Cl<sub>2</sub> at room temperature and *N*-ethyl-diisopropylamine (303 mg; 2.3 mmol) and DCC (531 mg, 2.53 mmol) were added consecutively. After 10 minutes the reaction was filtered, and the filtrate was evaporated under reduced pressure. The crude reaction mixture was purified by column chromatography over silica gel, eluting with CH<sub>2</sub>Cl<sub>2</sub>:EtOAc mixtures of increasing polarity. Compound **7** (1.08 g, 85%) was obtained as a white solid. m.p.: 93 °C. IR (nujol,  $\nu$  in cm<sup>-1</sup>

<sup>1</sup>): 3410, 3306, 2916, 1716, 1658, 1229, 1158, 730. <sup>1</sup>H NMR (400 MHz, CDCl<sub>3</sub>) δ 8.07 (br s, NH), 7.76 (d, *J* = 7.6 Hz, 2H), 7.53 (m, 2H), 7.43 – 7.34 (m, 3H), 7.29 (m, 4H), 7.23 – 7.17 (t, *J* = 7.2 Hz, 1H), 7.14 (t, *J* = 7.3 Hz, 1H), 6.20 (br s, NH), 5.49 (br s, NH), 4.54 (m, 1H), 4.41 (m, 2H), 4.19 (t, *J* = 7.0 Hz, 1H), 3.91 – 3.72 (m, 2H), 3.37 (m, 1H), 3.21 (dd, *J* = 14.6, 7.1 Hz, 1H), 1.42 (s, 9H). <sup>13</sup>C NMR (100 MHz, CDCl<sub>3</sub>) δ 171.4 (2C), 168.5 (C), 143.9 (C), 143.9 (C), 141.5 (2C), 141.4 (C), 136.3 (C), 127.9 (2CH), 127.2 (2CH), 125.3 (2CH), 123.4 (CH), 122.5 (CH), 120.1 (2CH), 120.1 (CH), 118.9 (CH), 111.4 (CH), 111.4 (C) 82.5 (C), 67.3 (CH<sub>2</sub>), 55.6 (CH), 47.3 (CH), 42.2 (CH<sub>2</sub>), 28.5 (CH<sub>2</sub>), 28.1 (3CH<sub>3</sub>). HRMS (ESI<sup>+</sup>): Calculated for C<sub>32</sub>H<sub>34</sub>N<sub>3</sub>O<sub>5</sub> [M + H]<sup>+</sup> 540.2493, found 540.2492.

▪ ***N*-Fmoc-Trp-Gly-OH (8)**

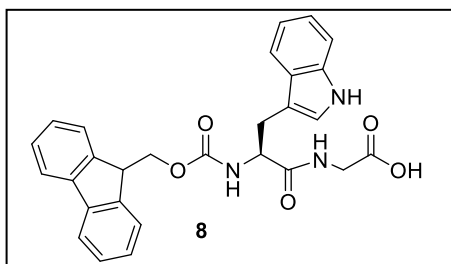

Compound **7** (1.1 g, 2.0 mmol) was treated with trifluoroacetic acid (0.8 mL, 10.5 mmol) in a round bottom flask equipped with a gas bubbler and heated at 70 °C for 10 minutes. After this time, the solvent was evaporated under reduced pressure and then, ethyl acetate (5 mL) was added to the crude and again concentrated under vacuum to remove possible traces

of remaining acid. Compound **8** (0.9 g, 94%) was obtained as a brownish solid which was used without further purification in the next step. m.p.: 108 °C; IR (nujol,  $\nu$  in cm<sup>-1</sup>): 3397, 3312, 2916, 1716, 1658, 1190, 736. <sup>1</sup>H NMR (400 MHz, CDCl<sub>3</sub>) δ 8.18 (br s, NH), 7.73 (d, *J* = 7.8 Hz, 2H), 7.48 (m, 2H), 7.40 – 7.33 (m, 3H), 7.29 – 7.19 (m, 4H), 7.10 (m, 2H), 6.94 (br s, NH), 6.60 (br s, NH), 4.60 (m, 1H), 4.47 – 4.24 (m, 2H), 4.12 (t, *J* = 7.0 Hz, 1H), 3.98 – 3.70 (m, 2H), 3.42 – 3.06 (m, 2H). <sup>13</sup>C NMR (100 MHz, CDCl<sub>3</sub>) δ 172.6 (C), 172.2 (2C), 143.8 (C), 143.7 (C), 141.4 (C), 141.4 (C), 136.3 (C), 127.9 (2CH), 127.5 (C), 127.3 (2CH), 125.2 (2CH), 123.8 (CH), 122.4 (CH), 120.2 (2CH), 119.9 (CH), 118.6 (CH), 111.5 (C), 111.5 (CH), 55.6 (CH), 47.1 (CH), 41.4 (CH<sub>2</sub>), 33.3 (CH<sub>2</sub>), 24.8 (CH<sub>2</sub>). HRMS (ESI<sup>+</sup>): Calculated for C<sub>28</sub>H<sub>26</sub>N<sub>3</sub>O<sub>5</sub> [M + H]<sup>+</sup> 484.1867, found 484.1864.

▪ ***N*-Fmoc-Trp-Gly-Trp-OMe (9)**

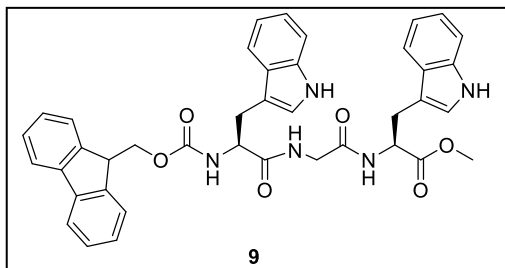

First, Trp-OMe • HCl (1.0 g, 3.9 mmol) was treated with an aqueous solution of sodium carbonate (883 mg, 8.3 mmol; dissolved in the minimum amount of water) and ethyl acetate (10 mL). After stirring for 10 minutes, the phases were separated, the organic layer was dried over anhydrous sodium sulfate, filtered, and the solvent was evaporated under reduced pressure yielding Trp-OMe (820 mg, 95%)

as a white solid. Then, compound **8** (300 mg, 0.6 mmol) and Trp-OMe (135 mg, 0.6 mmol) were dissolved in 15 mL of CH<sub>2</sub>Cl<sub>2</sub> and DCC (141 mg, 0.7 mmol) was slowly added. The reaction mixture was maintained in a covered flask, stirring at room temperature for 30 minutes. Then, the resultant mixture was filtered to eliminate *N,N'*-dicyclohexylurea (DCU) and the filtrate acidified with 10 mL of HCl 1M. The organic layer was basified with Na<sub>2</sub>CO<sub>3</sub>, dried over anhydrous sodium sulfate, filtered, and the solvent was evaporated under reduced pressure. The crude reaction mixture was then purified by column chromatography over silica gel, eluting with CH<sub>2</sub>Cl<sub>2</sub>:EtOAc mixtures of increasing polarity (starting with 90:10) and the deep yellow fraction was collected. Compound **9** (273 mg, 64%) was obtained as a pale-yellow solid. m.p.: 115 °C. IR (nujol,  $\nu$  in cm<sup>-1</sup>): 3390, 3299, 2916, 1729, 1651, 1262, 749. <sup>1</sup>H NMR (400 MHz, CDCl<sub>3</sub>) δ 8.16 (br s, NH), 7.92 (s, NH),



7.75 (d,  $J = 7.6$  Hz, 2H), 7.53 – 7.46 (d,  $J = 7.5$  Hz, 2H), 7.45 – 7.34 (m, 3H), 7.33 – 7.22 (m, 6H), 7.22 – 7.03 (m, 4H), 6.89 (d,  $J = 2.3$  Hz, 1H), 6.56 (d, NH), 6.21 (br s, NH), 5.38 (d, NH), 4.81 (dd,  $J = 13.0, 5.5$  Hz, 1H), 4.50 – 4.25 (m, 3H), 4.17 – 4.07 (t,  $J = 7.5$  Hz, 1H), 3.77 (dd,  $J = 16.7, 5.6$  Hz, 1H), 3.70 – 3.60 (m, 4H), 3.34 – 3.18 (m, 3H), 3.10 (m, 1H).  $^{13}\text{C}$  NMR (101 MHz,  $\text{CDCl}_3$ )  $\delta$  172.3 (C), 172.1 (2C), 168.4 (C), 143.9 (C), 143.8 (C), 141.5 (3C), 136.3 (C), 136.2 (C), 127.9 (2CH), 127.6 (C), 127.2 (2CH), 125.2 (2CH), 123.5 (2CH), 122.5 (CH), 122.4 (CH), 120.2 (2CH), 120.0 (CH), 119.8 (CH), 118.7 (CH), 118.5 (CH), 111.6 (CH), 111.6 (C), 111.5 (CH), 109.7 (C), 67.2 ( $\text{CH}_2$ ), 55.7 (CH), 52.8 ( $\text{CH}_3$ ), 52.6 (CH), 47.2 (CH), 43.3 ( $\text{CH}_2$ ), 28.1 ( $\text{CH}_2$ ), 27.4 ( $\text{CH}_2$ ). HRMS (ESI+): Calculated for  $\text{C}_{40}\text{H}_{38}\text{N}_5\text{O}_6$   $[\text{M} + \text{H}]^+$  684.2817, found 684.2814.

▪ **Trp-Gly-Trp (10)**

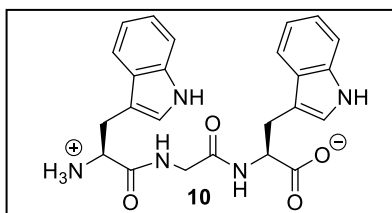

A solution of NaOH (142 mg, 3.6 mmol) in 10 mL of MeOH was added to compound **9** (973 mg, 1.4 mmol) at room temperature. After 5 minutes the reaction mixture was concentrated under vacuum and partitioned with 10 mL of  $\text{H}_2\text{O}$  and 10 mL of  $\text{CH}_2\text{Cl}_2$ . The organic layer was discarded, and potassium dihydrogen phosphate was added to the aqueous layer and the solvent was evaporated under vacuum. After addition of absolute EtOH and sonication, the solid was filtered off and the filtrate evaporated under reduced pressure yielding compound **10** (450 mg, 71%) as an orange-yellowish solid. m.p.: 156 °C. IR (nujol,  $\nu$  in  $\text{cm}^{-1}$ ): 3591, 3468, 2923, 1761, 1690, 723.  $^1\text{H}$  NMR (400 MHz,  $\text{D}_2\text{O}$ )  $\delta$  7.54 (m, 2H), 7.45 (d,  $J = 8.1$  Hz, 1H), 7.39 (d,  $J = 8.1$  Hz, 1H), 7.22 – 7.12 (m, 2H), 7.09 (m, 4H), 4.49 (dd,  $J = 7.5, 4.9$  Hz, 1H), 3.60 – 3.45 (m, 3H), 3.31 (dd,  $J = 14.8, 4.8$  Hz, 1H), 3.10 (dd,  $J = 14.8, 7.6$  Hz, 1H), 2.99 (d,  $J = 6.7$  Hz, 2H).  $^{13}\text{C}$  NMR (100 MHz,  $\text{D}_2\text{O}$ )  $\delta$  178.1 (C), 175.5 (C), 169.9 (C), 136.1 (C), 136.0 (C), 127.3 (C), 126.8 (C), 124.6 (CH), 124.1 (CH), 121.9 (CH), 121.7 (CH), 119.3 (CH), 119.2 (CH), 118.4 (CH), 118.4 (CH), 111.8 (CH), 111.8 (CH), 110.0 (C), 108.6 (C), 55.7 (CH), 54.7 (CH), 42.4 ( $\text{CH}_2$ ), 29.0 ( $\text{CH}_2$ ), 27.2 ( $\text{CH}_2$ ). HRMS (ESI+): Calculated for  $\text{C}_{24}\text{H}_{26}\text{N}_5\text{O}_4$   $[\text{M} + \text{H}]^+$  448.1979, found 448.1977.

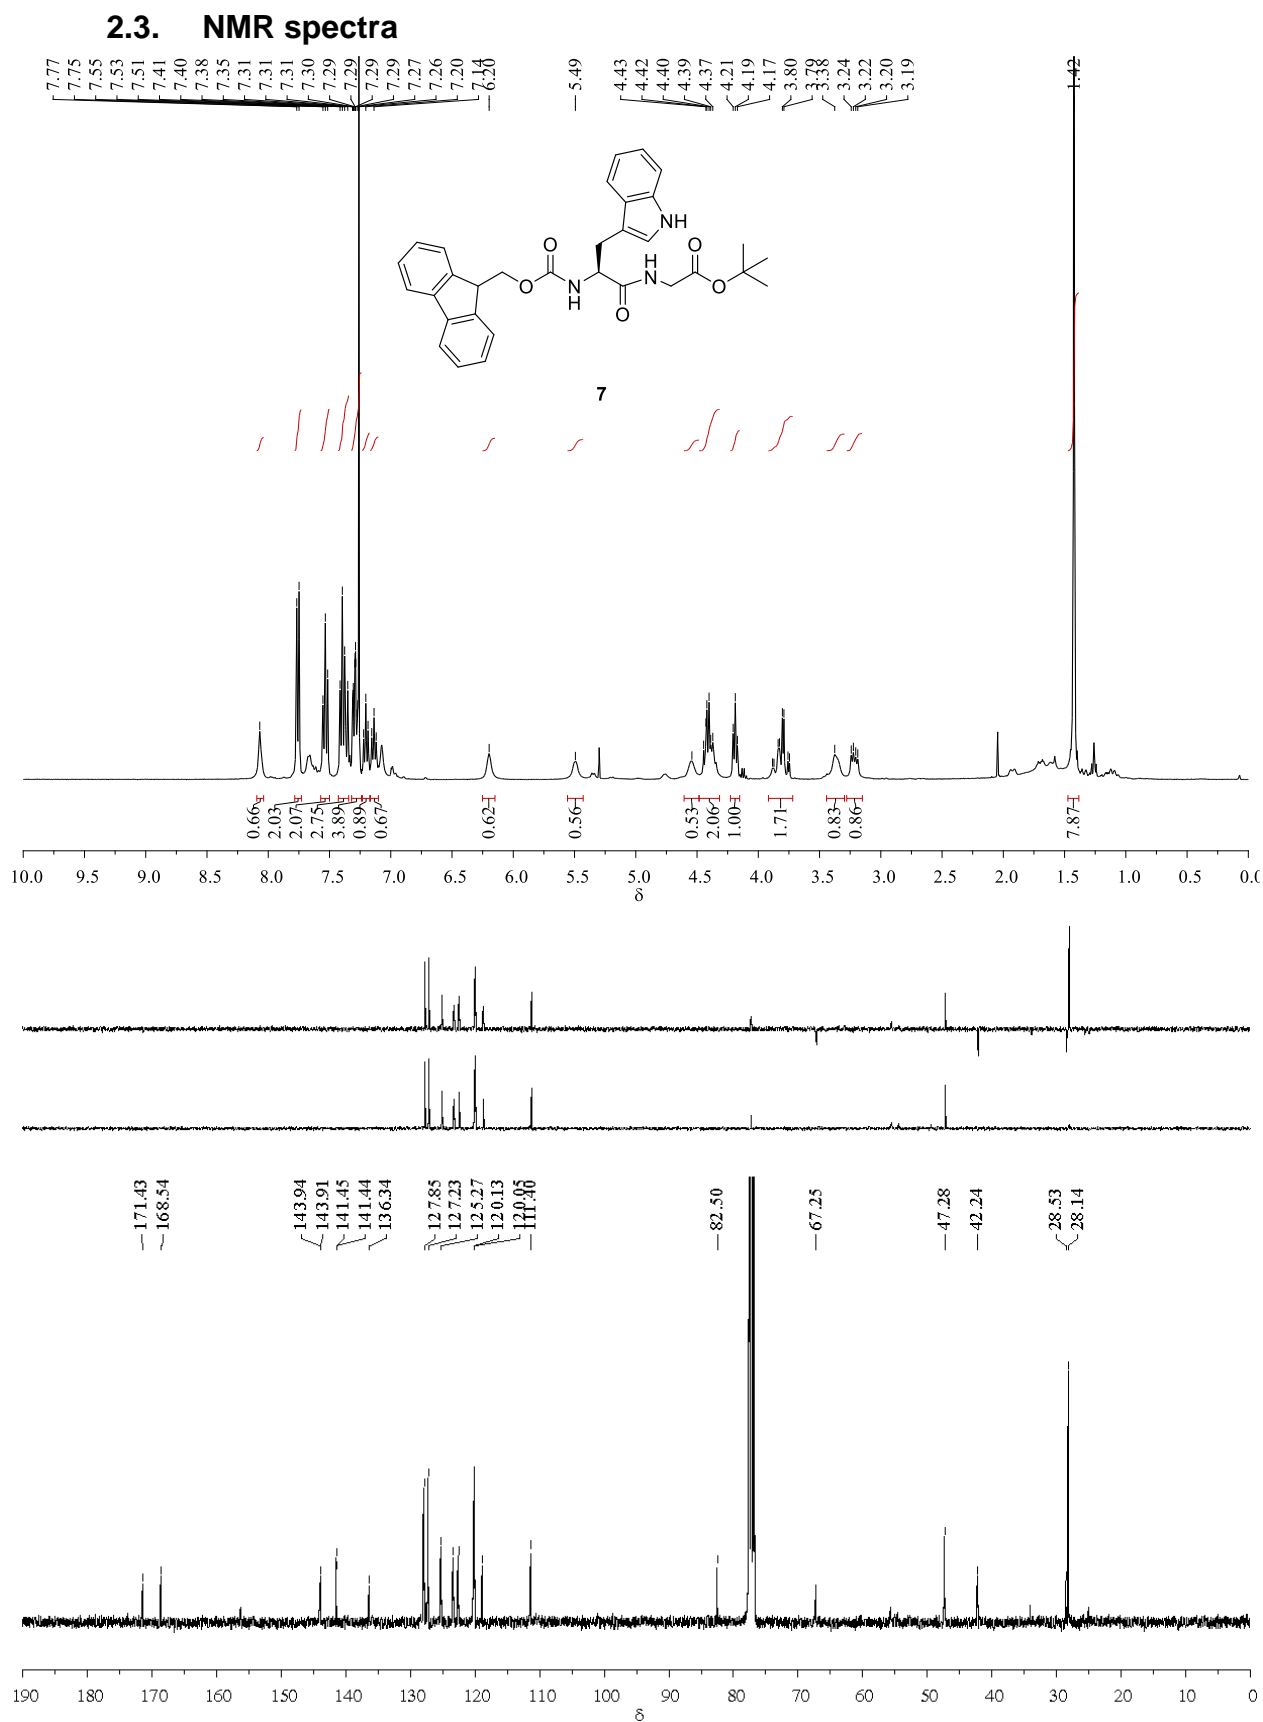

**Figure S1.**  $^1\text{H}$  and  $^{13}\text{C}$  spectra of *N*-Fmoc-Trp-Gly-OtBu (**7**) in  $\text{CDCl}_3$ .

220523\_017 #15 RT: 0.14 AV: 1 NL: 1.31E+009  
T: FTMS + p ESI Full ms [100.0000-1500.0000]

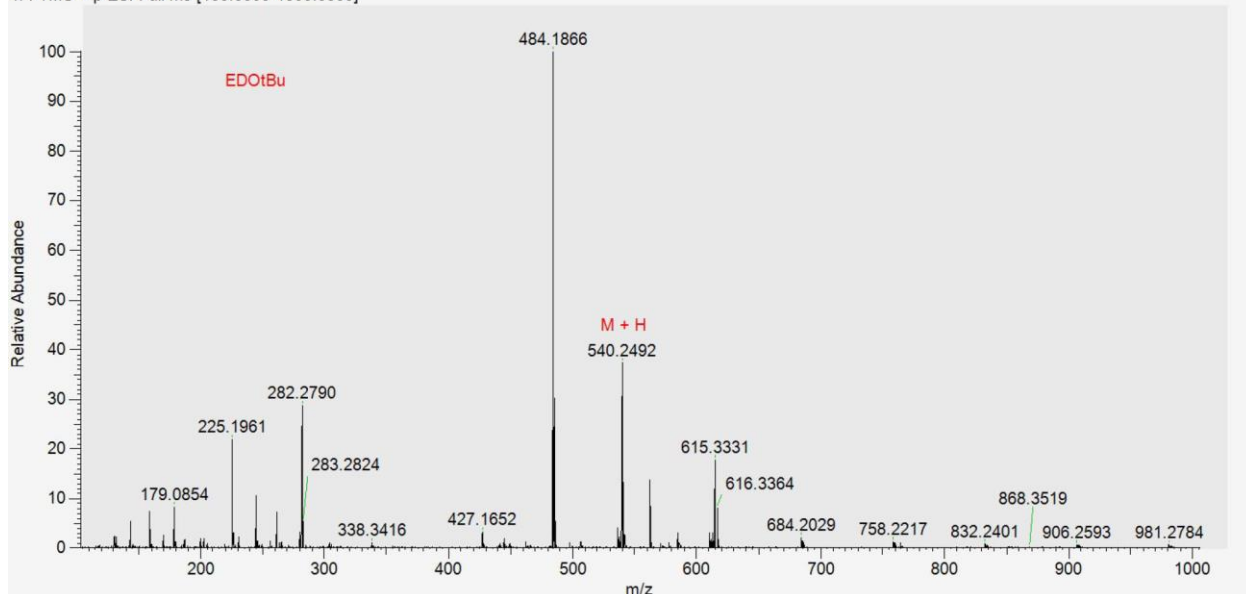

| Display Formula      | S Fit | RDB  | Delta [mmu] | Theo. mass | Combined Score | # Matched Iso. |
|----------------------|-------|------|-------------|------------|----------------|----------------|
| $C_{32}H_{34}O_5N_3$ | 52,62 | 17,5 | -0,09       | 540,2493   | 96,9           | 4              |

**Figure S2.** Mass spectrum of *N*-Fmoc-Trp-Gly-OtBu (**7**).

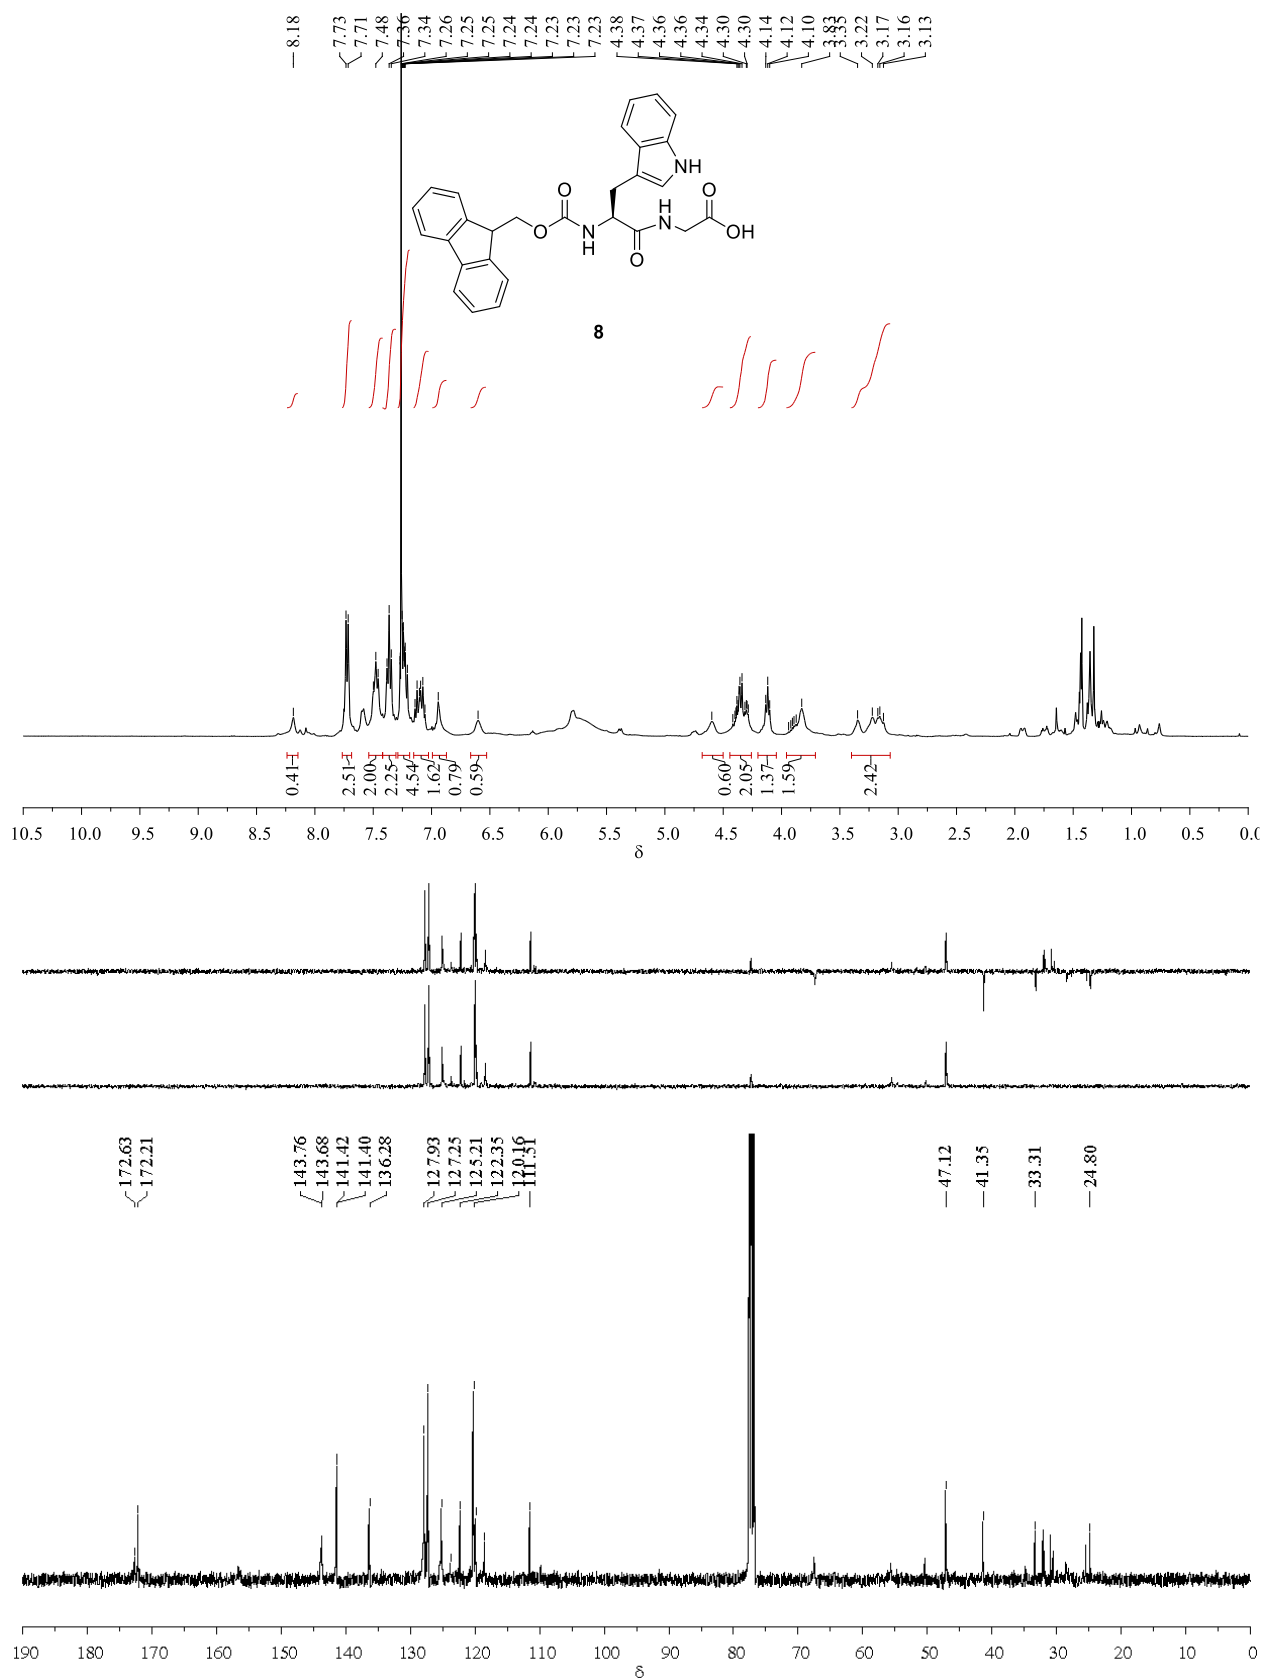

Figure S3.  $^1\text{H}$  and  $^{13}\text{C}$  spectra of *N*-Fmoc-Trp-Gly-OH (**8**) in CDCl<sub>3</sub>.

220523\_015 #15 RT: 0.14 AV: 1 NL: 1.13E+009  
T: FTMS + p ESI Full ms [100.0000-1500.0000]

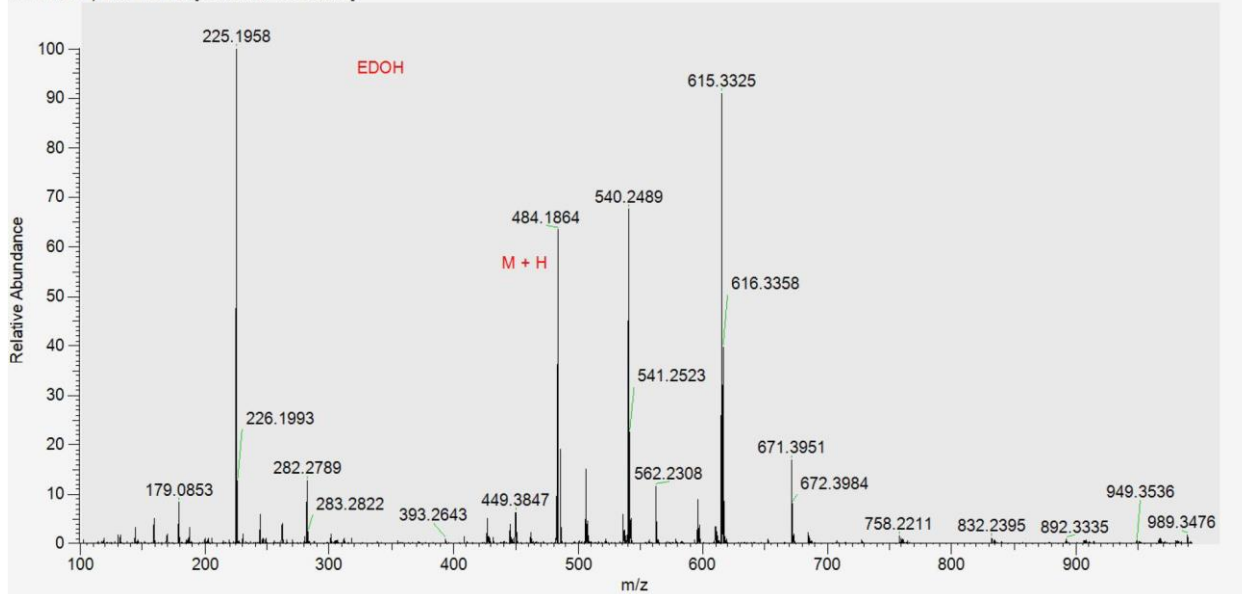

| Display Formula      | S Fit | RDB  | Delta [ppm] | Theo. mass | Combined Score | # Matched Iso. |
|----------------------|-------|------|-------------|------------|----------------|----------------|
| $C_{28}H_{26}O_5N_3$ | 76,09 | 17,5 | -0,61       | 484,1867   | 94,02          | 4              |

**Figure S4.** Mass spectrum of *N*-Fmoc-Trp-Gly-OH (**8**).

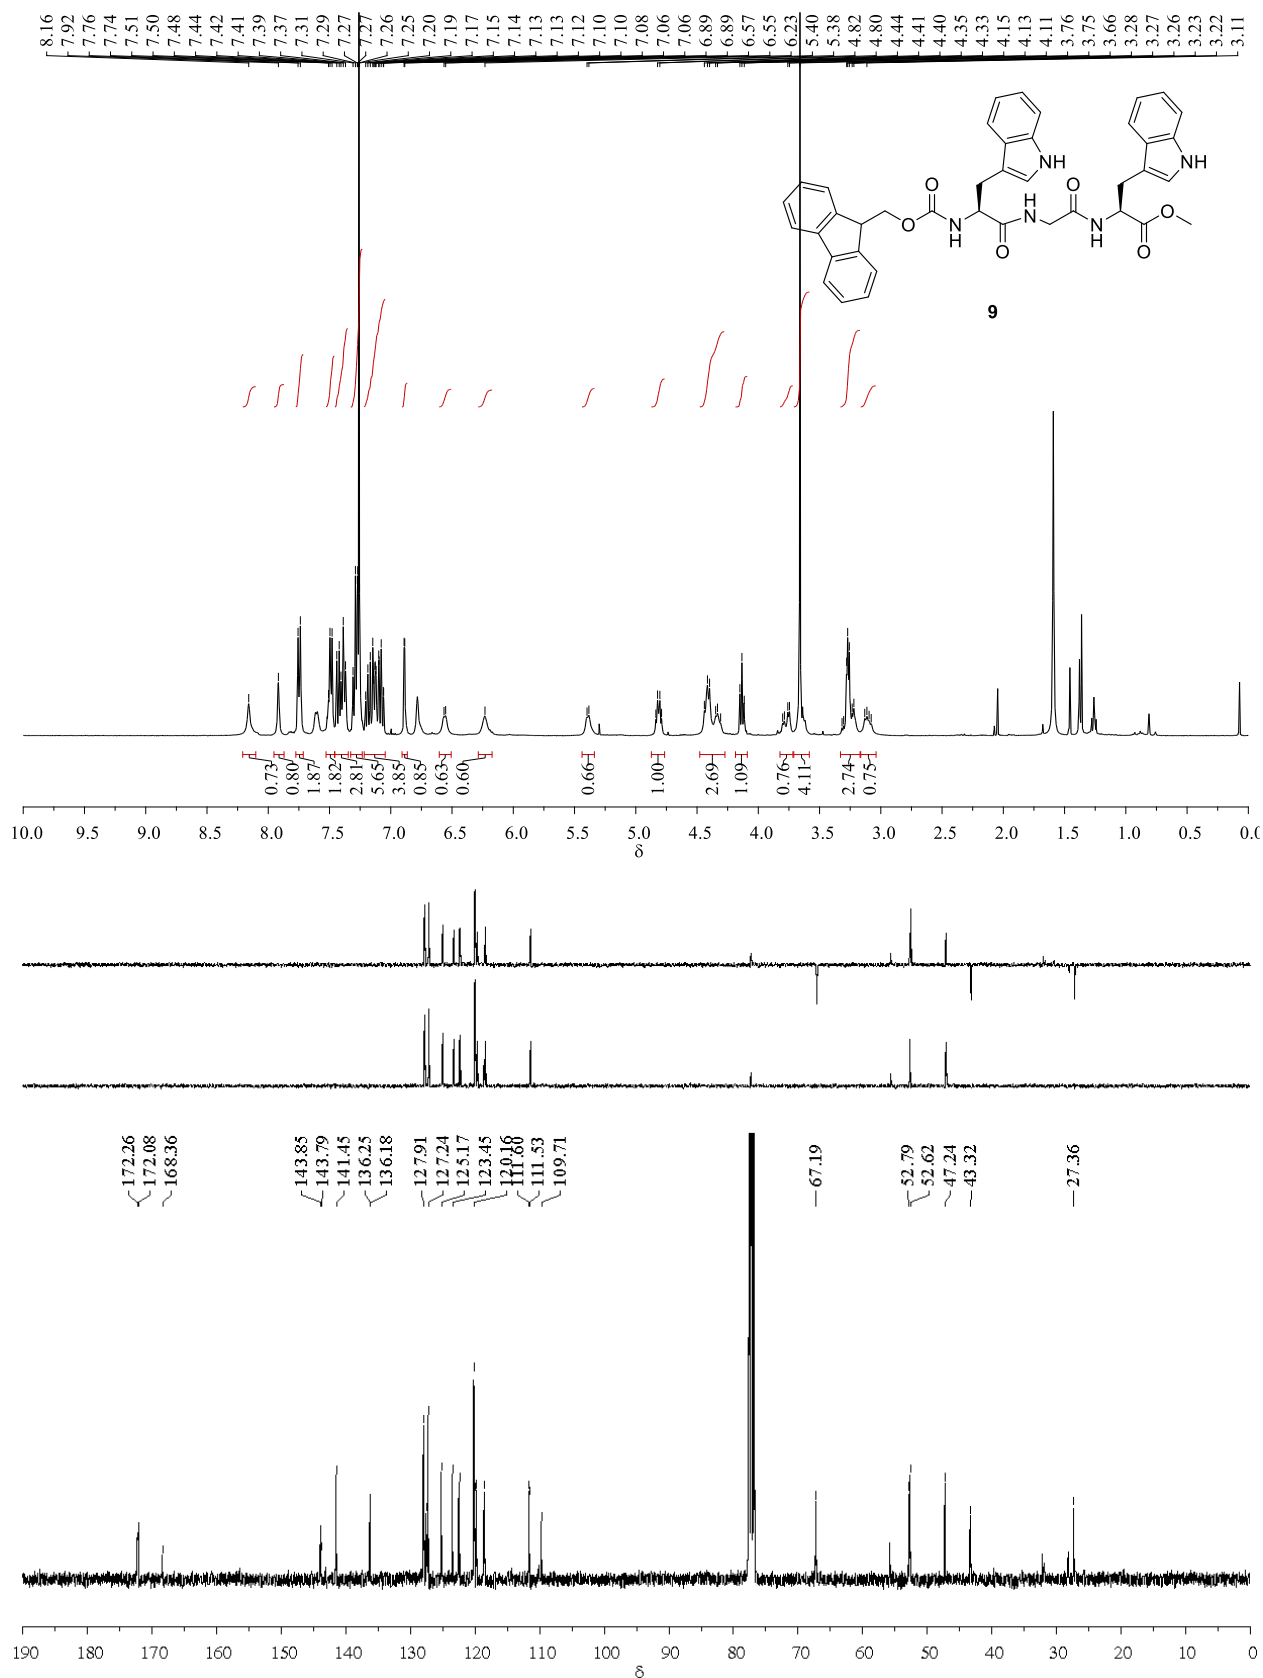

Figure S5. <sup>1</sup>H and <sup>13</sup>C spectra of N-Fmoc-Trp-Gly-Trp-OMe (**9**) in CDCl<sub>3</sub>.

220523\_018 #15 RT: 0.14 AV: 1 NL: 1.26E+009  
T: FTMS + p ESI Full ms [100.0000-1500.0000]

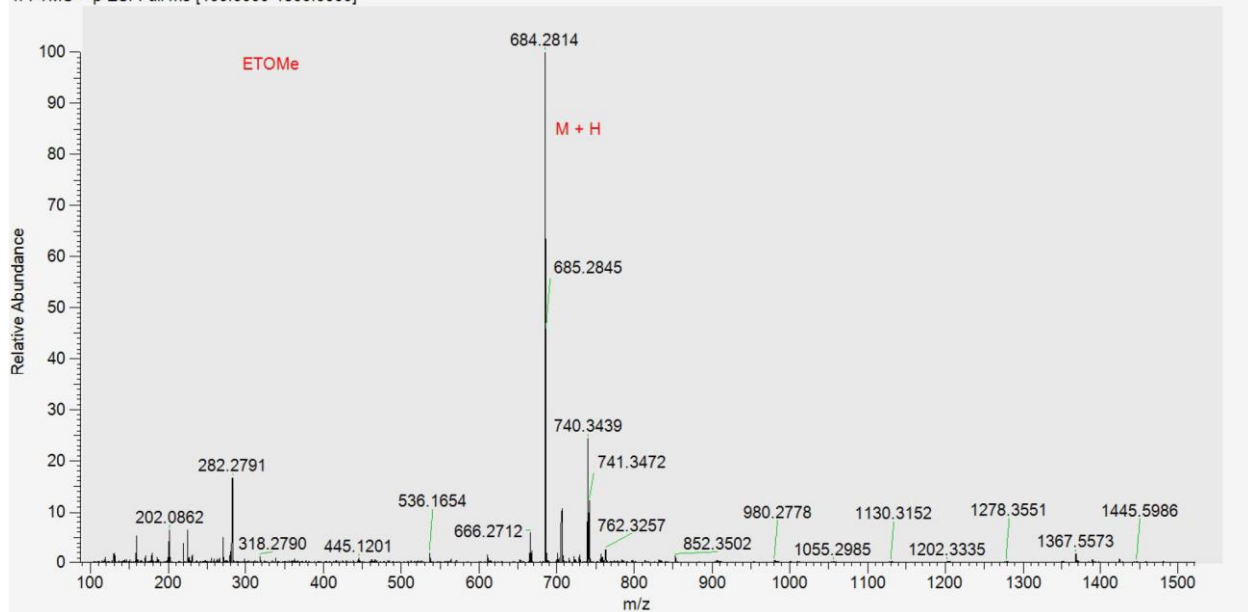

| Display Formula      | S Fit | RDB  | Delta [ppm] | Theo. mass | Combined Score | # Matched Iso. |
|----------------------|-------|------|-------------|------------|----------------|----------------|
| $C_{40}H_{38}O_6N_5$ | 92,34 | 24,5 | -0,42       | 684,28166  | 98,49          | 5              |

**Figure S6.** Mass spectrum of *N*-Fmoc-Trp-Gly-Trp-OMe (**9**).

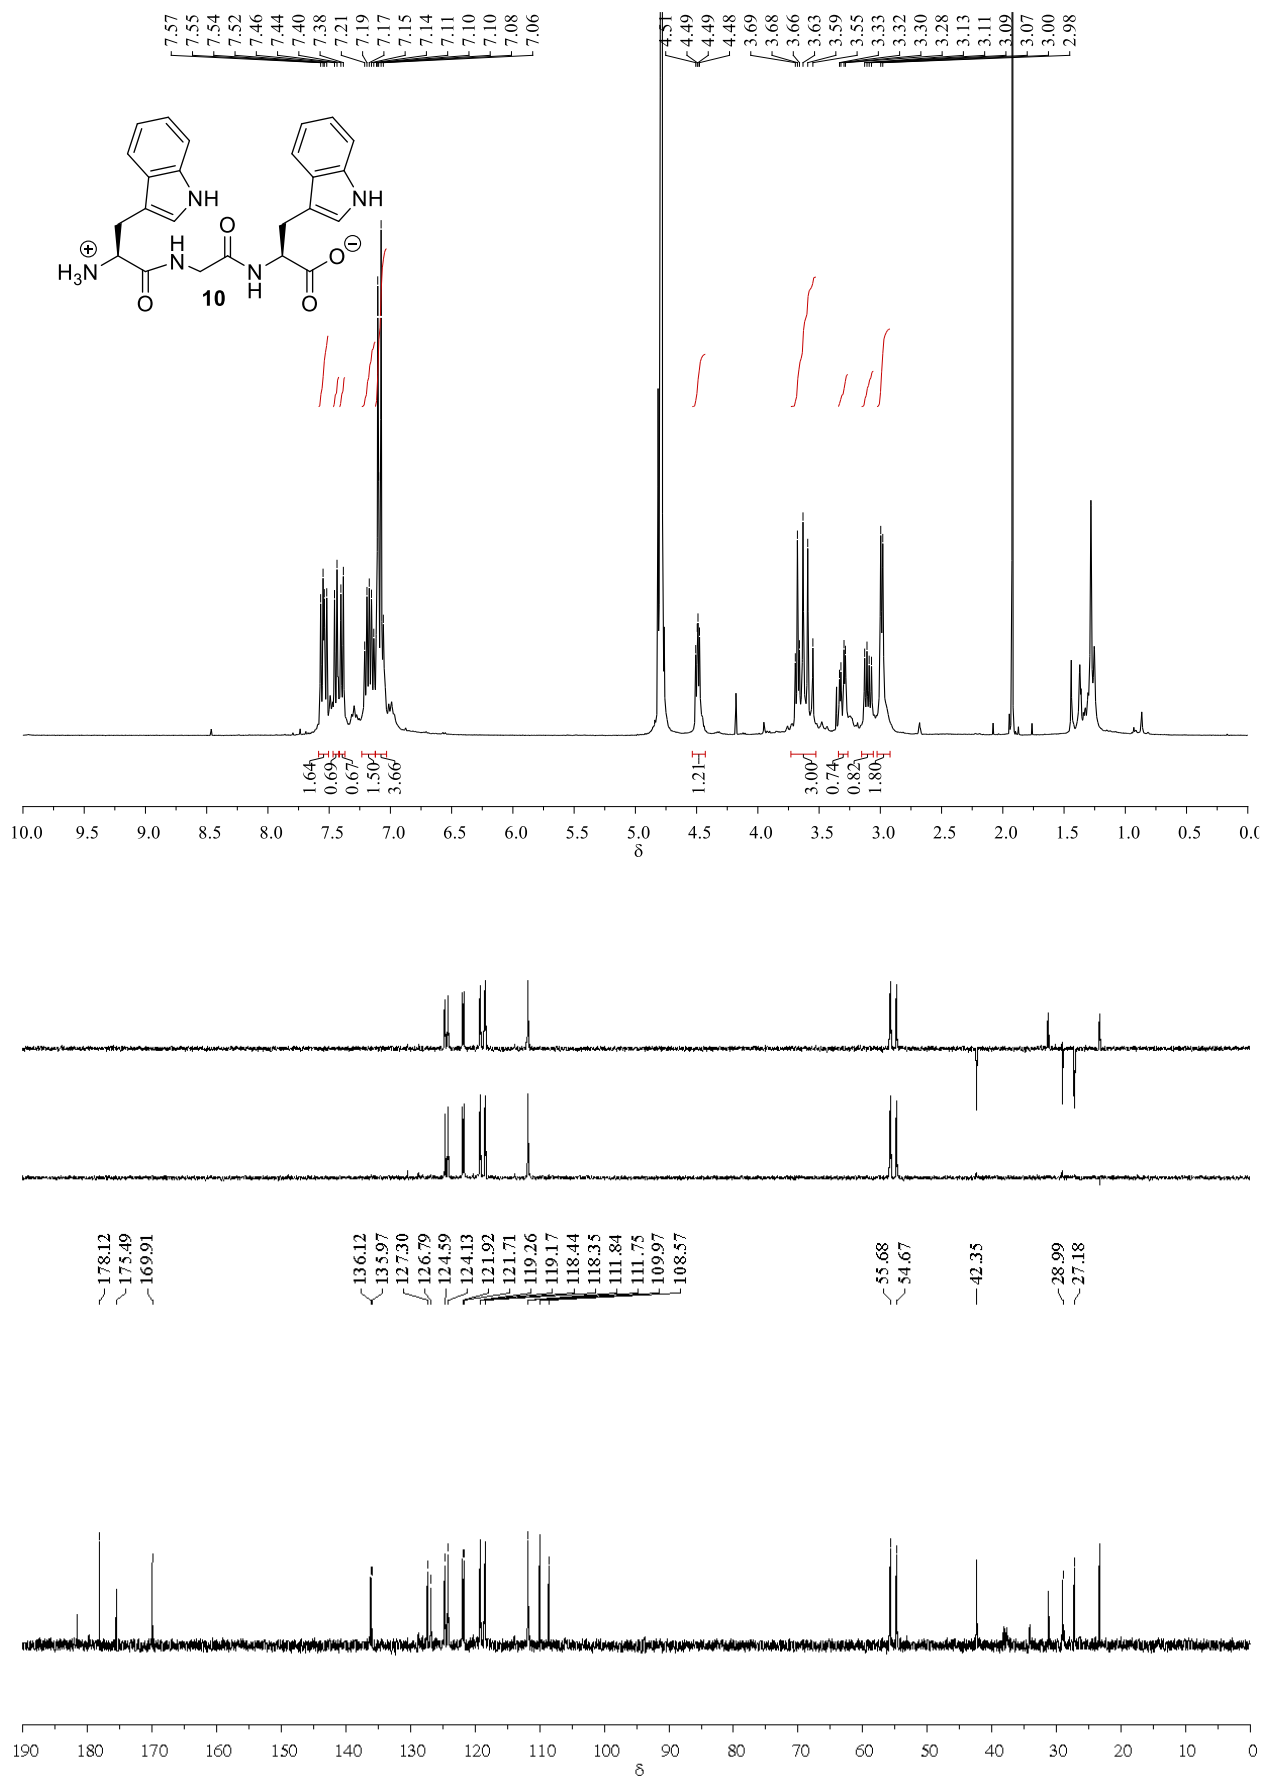

**Figure S7.**  $^1\text{H}$  and  $^{13}\text{C}$  spectra of *Trp-Gly-Trp* (**10**) in  $\text{D}_2\text{O}$ .



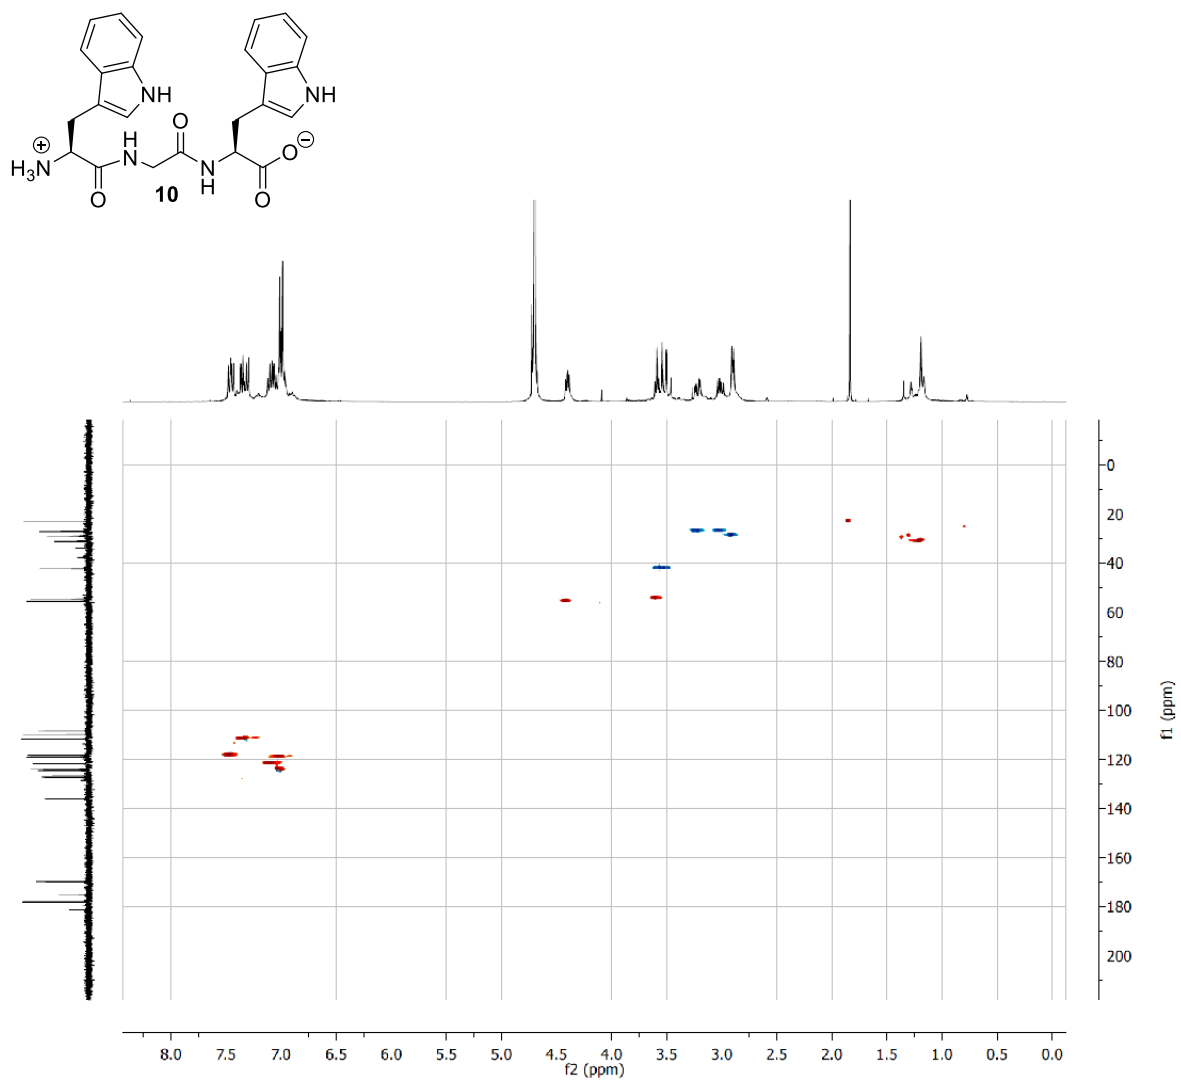

**Figure S8.** HSQC 145 Hz of Trp-Gly-Trp (**10**) in D<sub>2</sub>O.

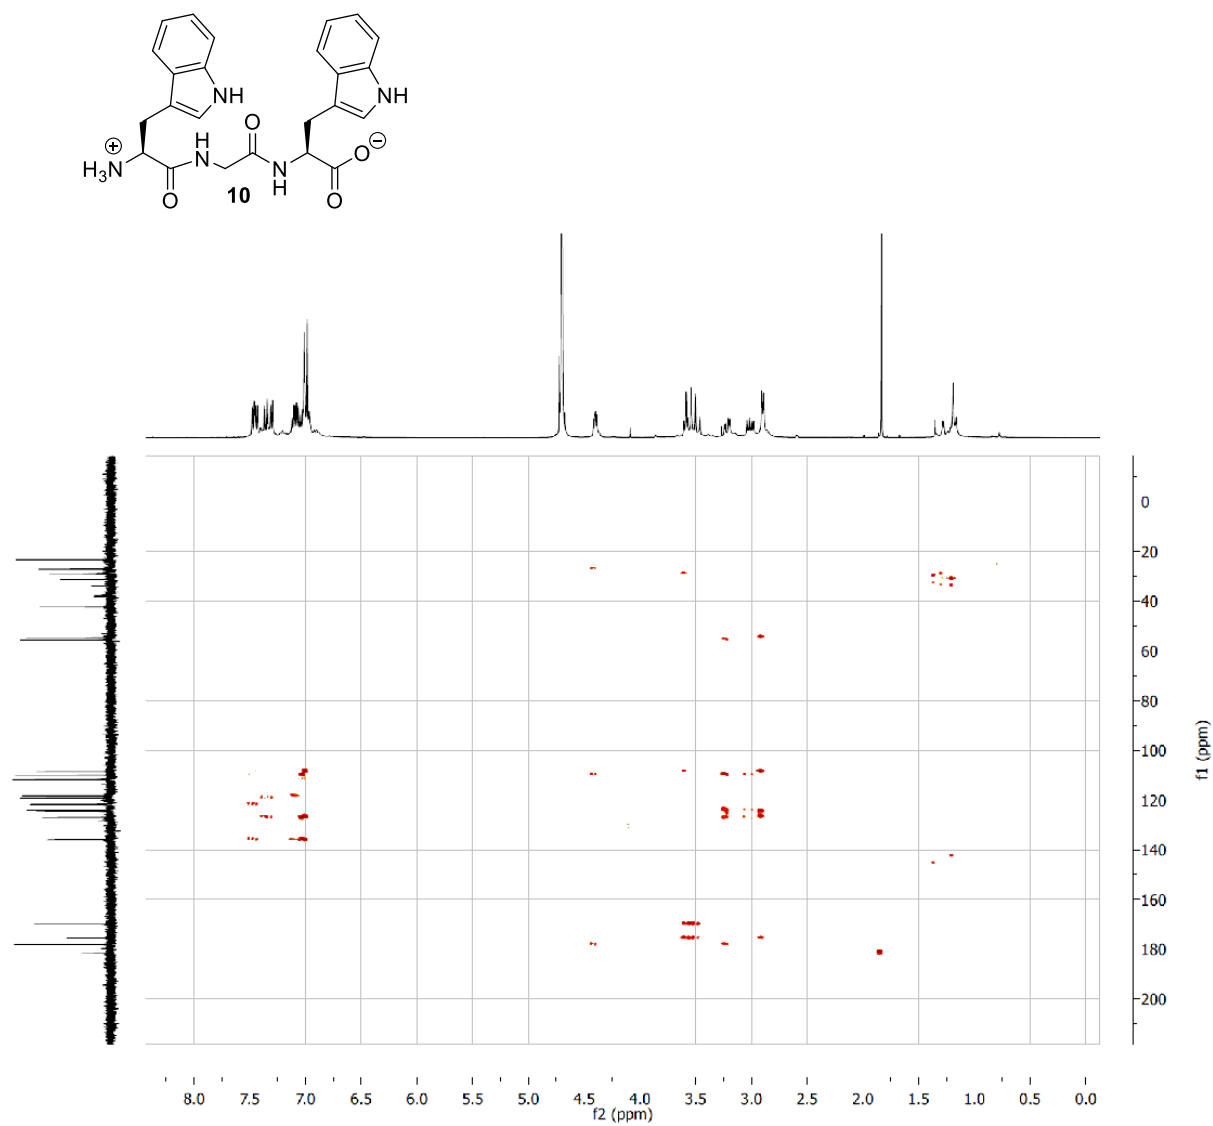

**Figure S9.** *HMBC CIGAR of Trp-Gly-Trp (10) in D<sub>2</sub>O.*

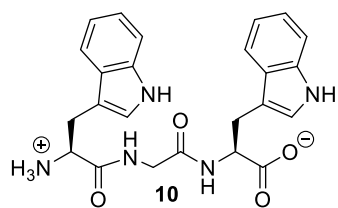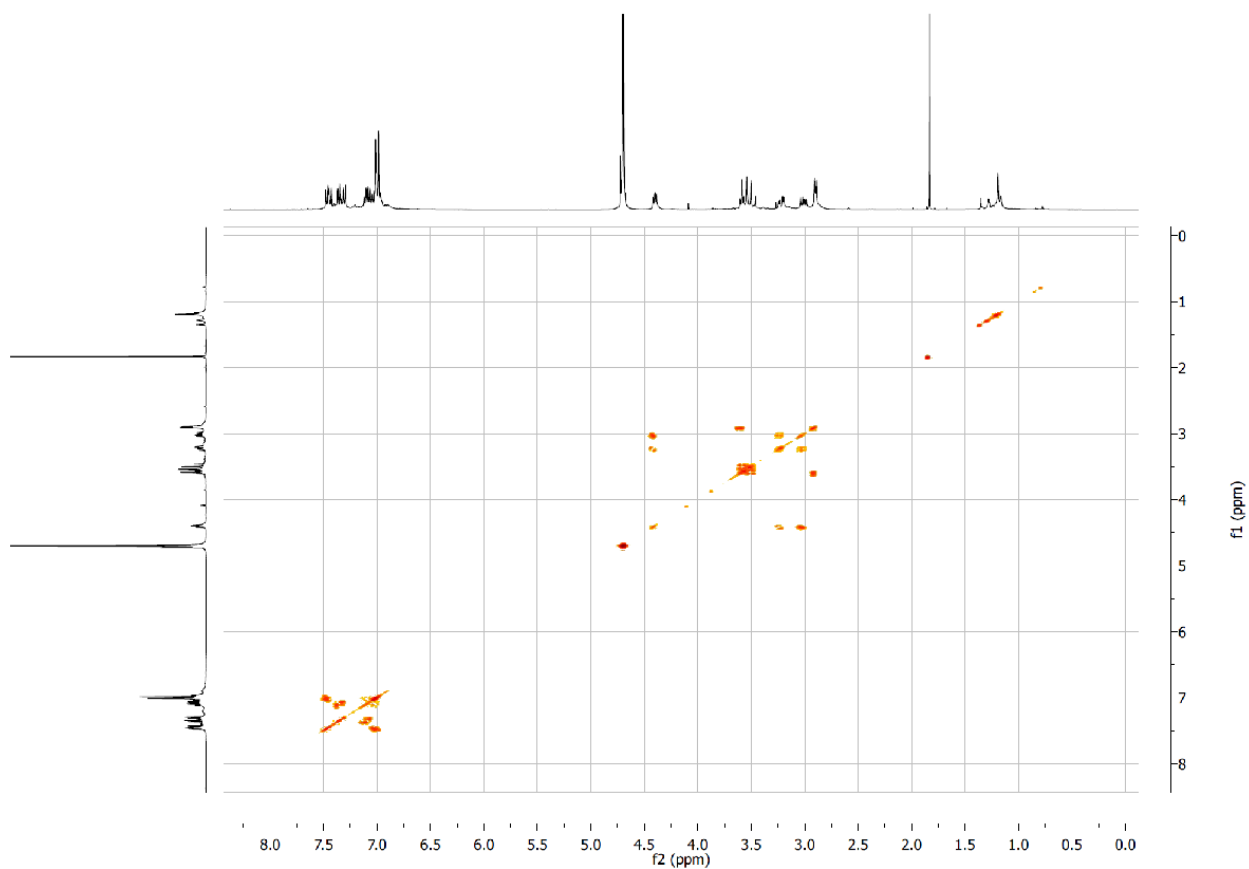

**Figure S10.** COSY spectrum of Trp-Gly-Trp (**10**) in D<sub>2</sub>O.

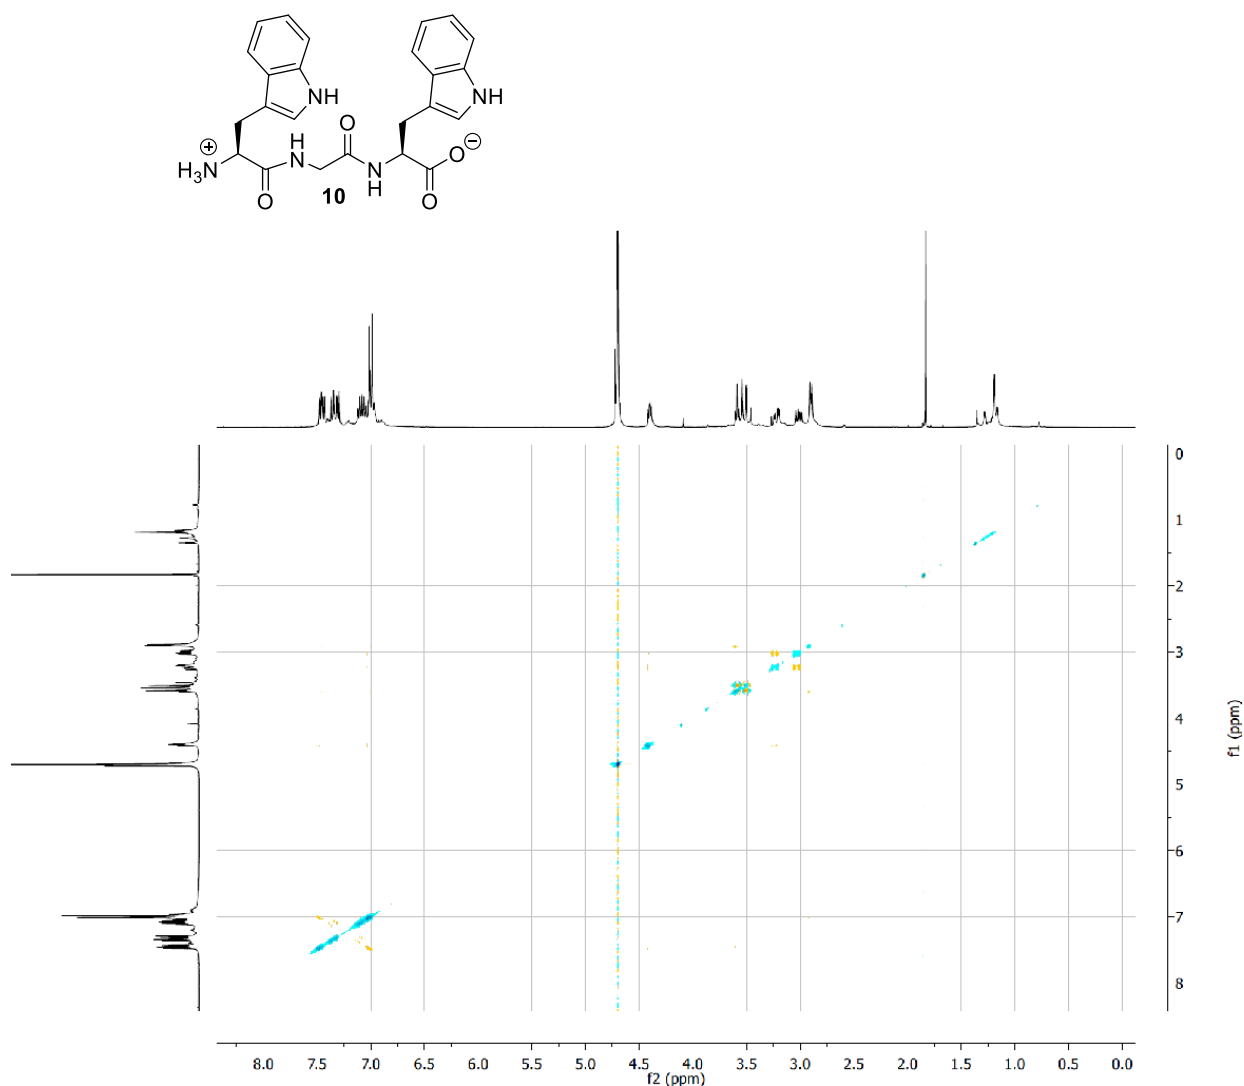

**Figure S11.** ROESY of *Trp-Gly-Trp* (**10**) in  $D_2O$ .

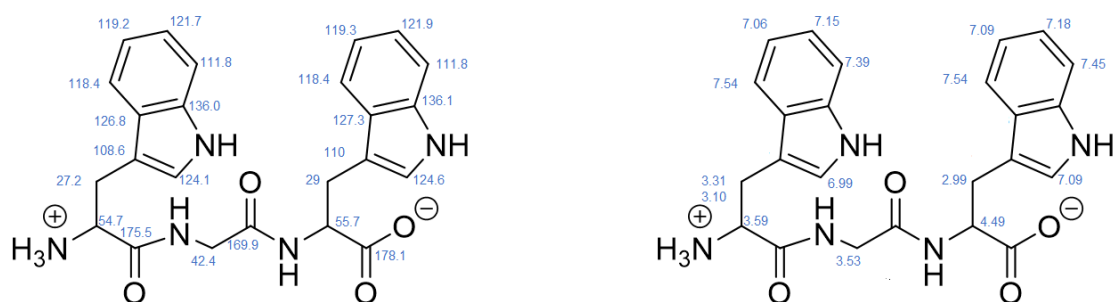

**Figure S12.** Assignments of NMR signals for *Trp-Gly-Trp* (**10**) in  $D_2O$ .

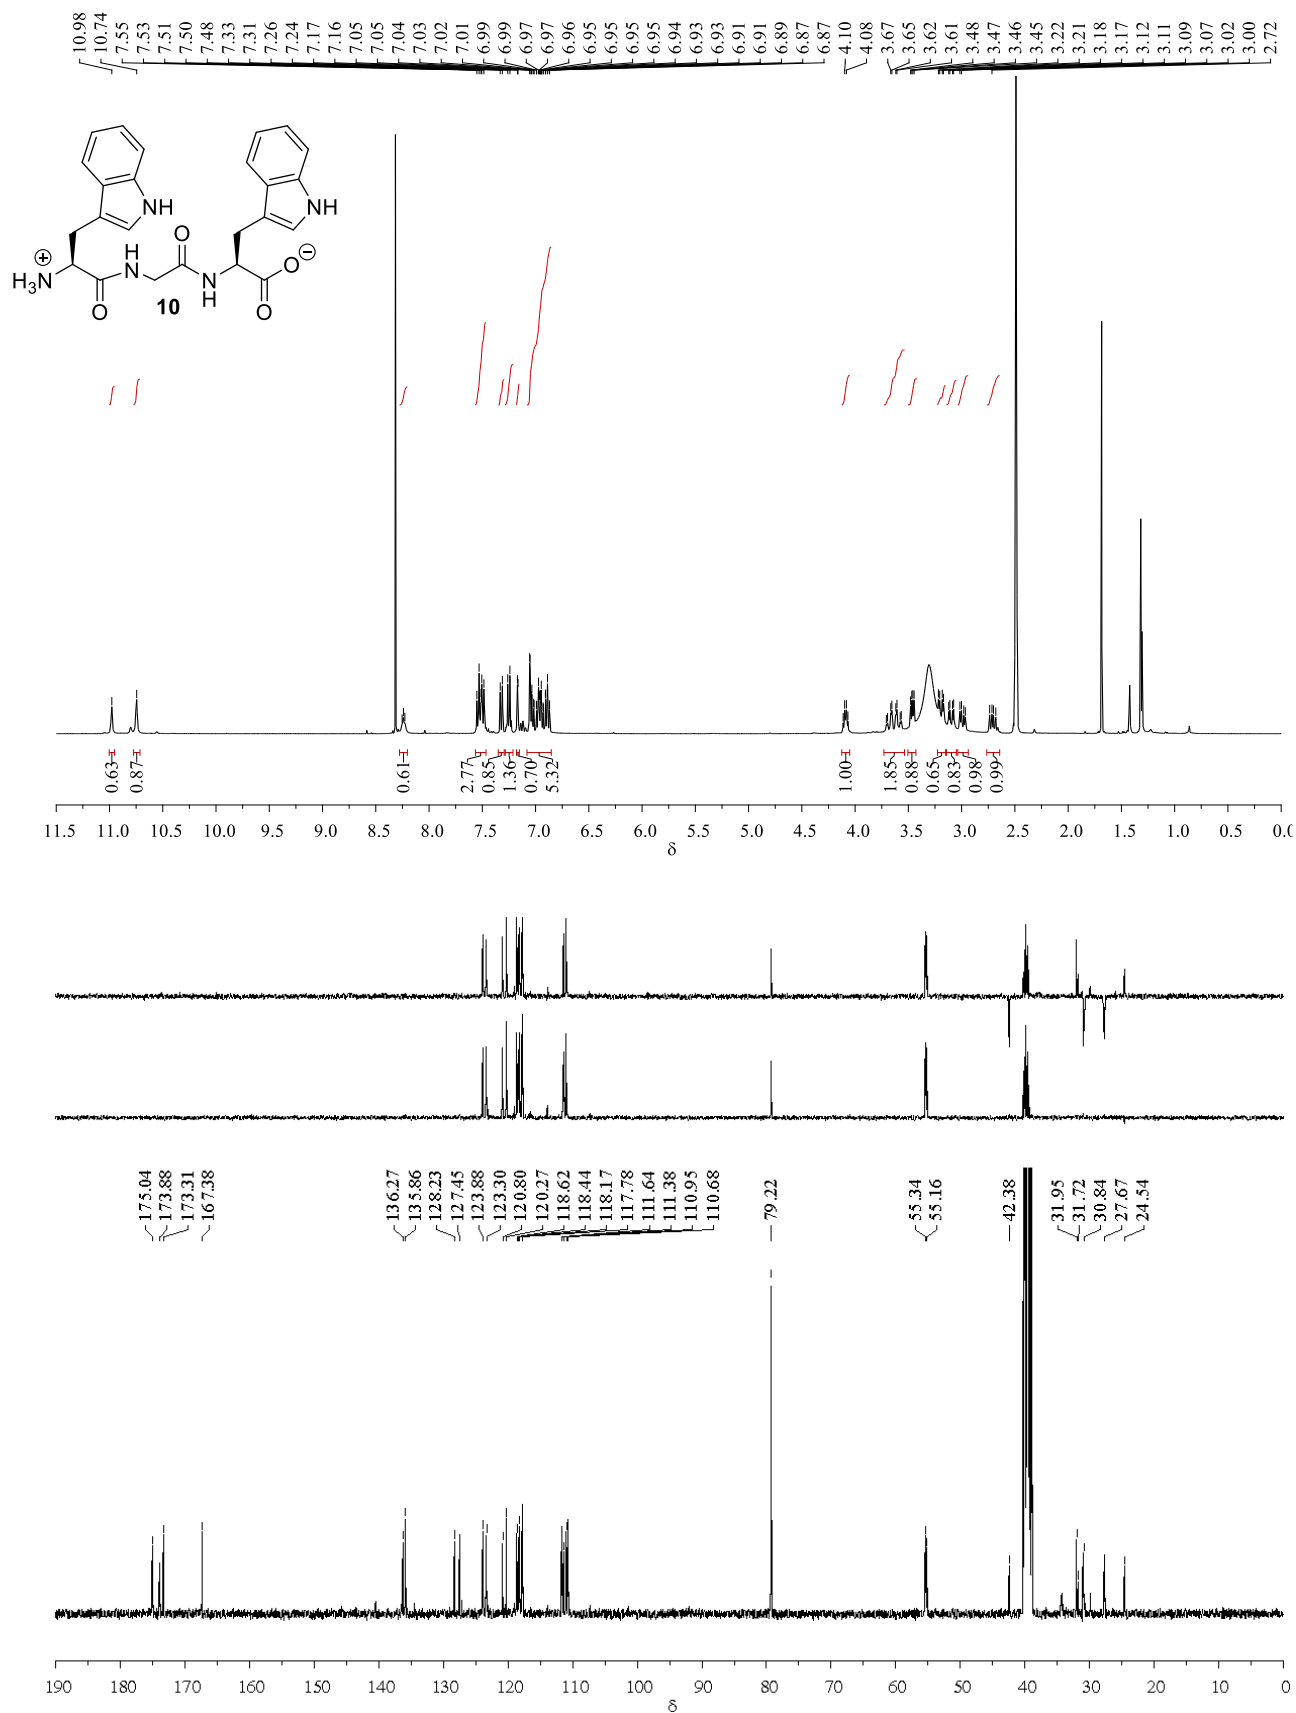

**Figure S13.** <sup>1</sup>H and <sup>13</sup>C spectra of Trp-Gly-Trp (10) in DMSO-d<sub>6</sub>.

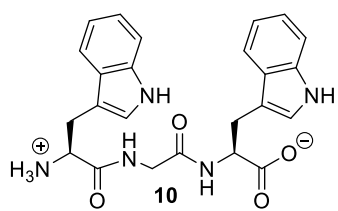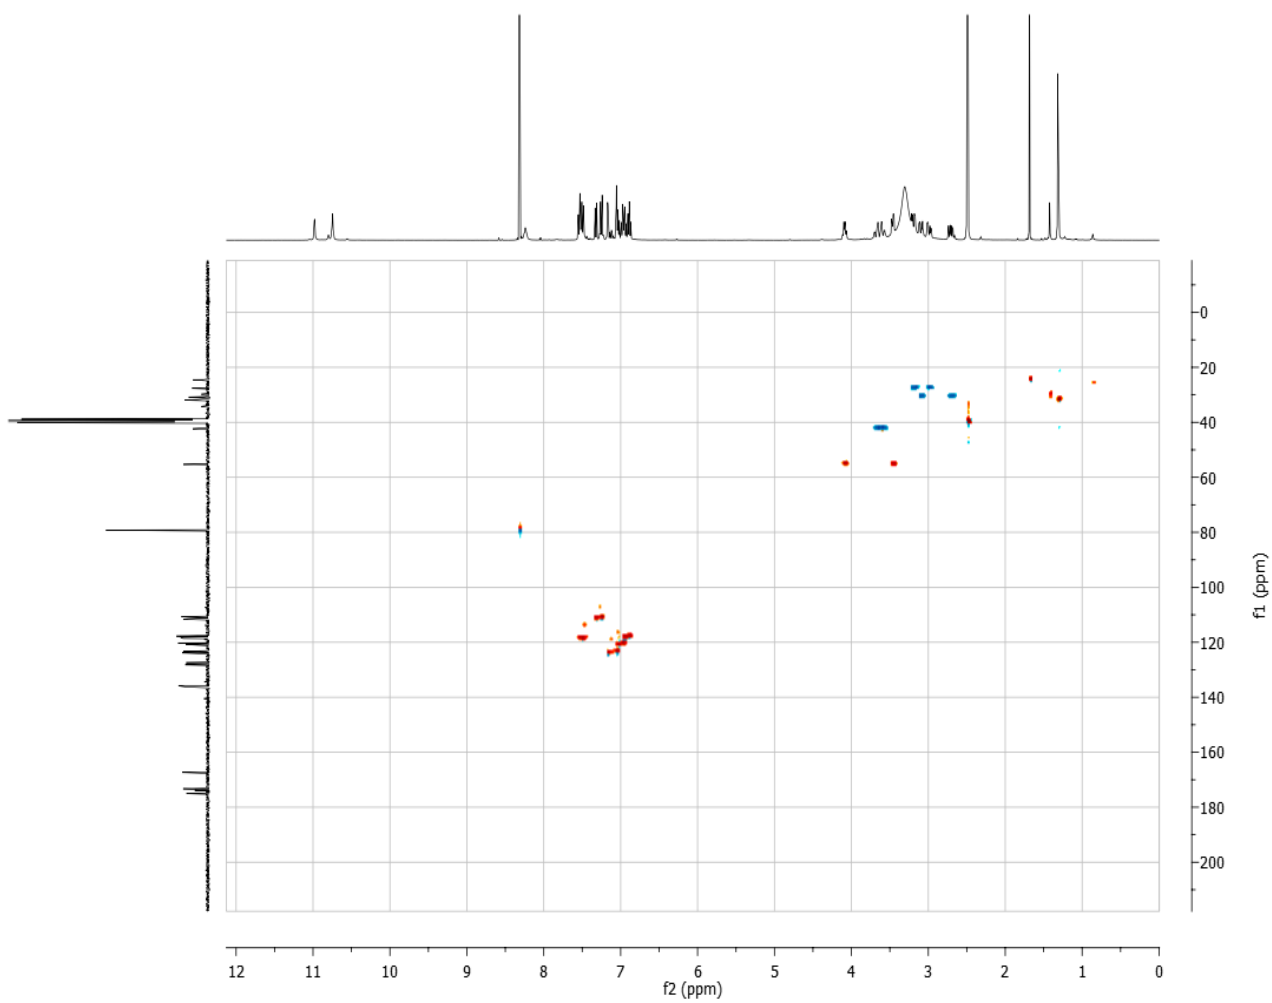

**Figure S14.** HSQC 145 Hz of Trp-Gly-Trp (10) in DMSO-d<sub>6</sub>.

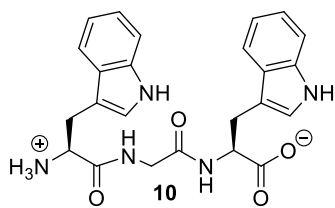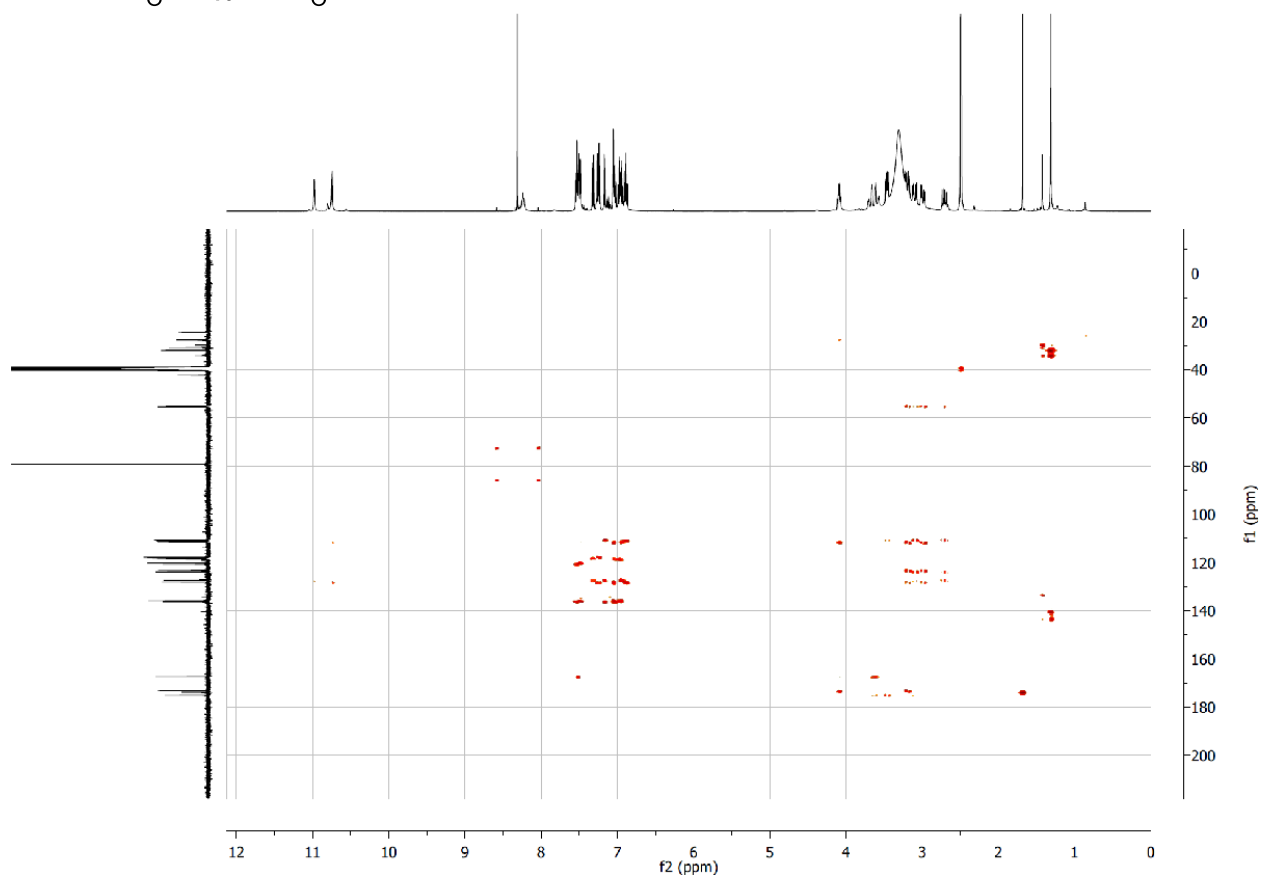

**Figure S15.** *HMBC CIGAR of Trp-Gly-Trp (10) in DMSO-d<sub>6</sub>.*

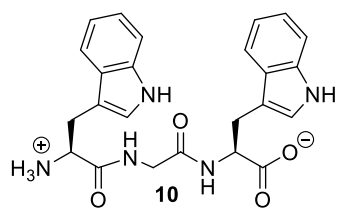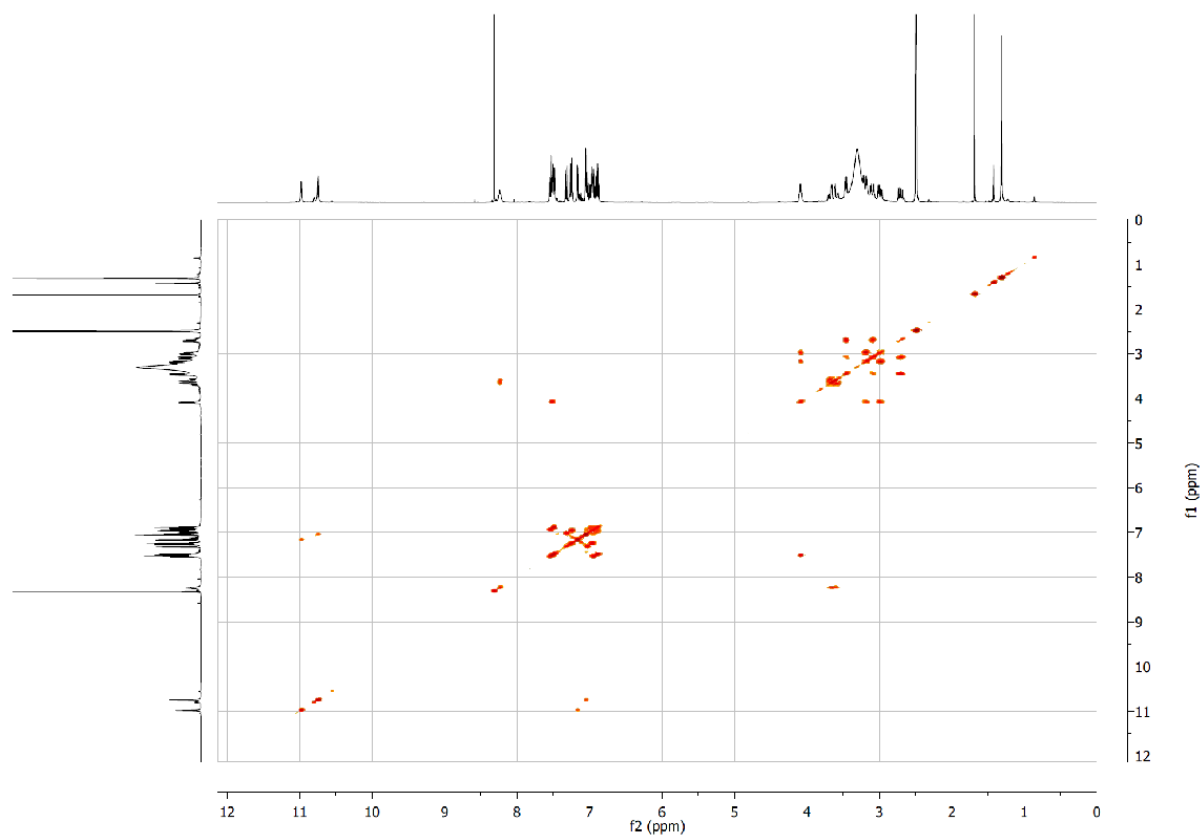

**Figure S16.** COSY spectrum of *Trp-Gly-Trp* (**10**) in *DMSO-d*<sub>6</sub>.



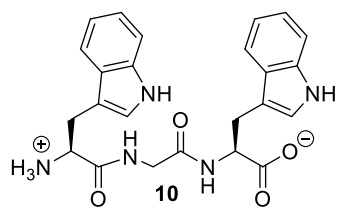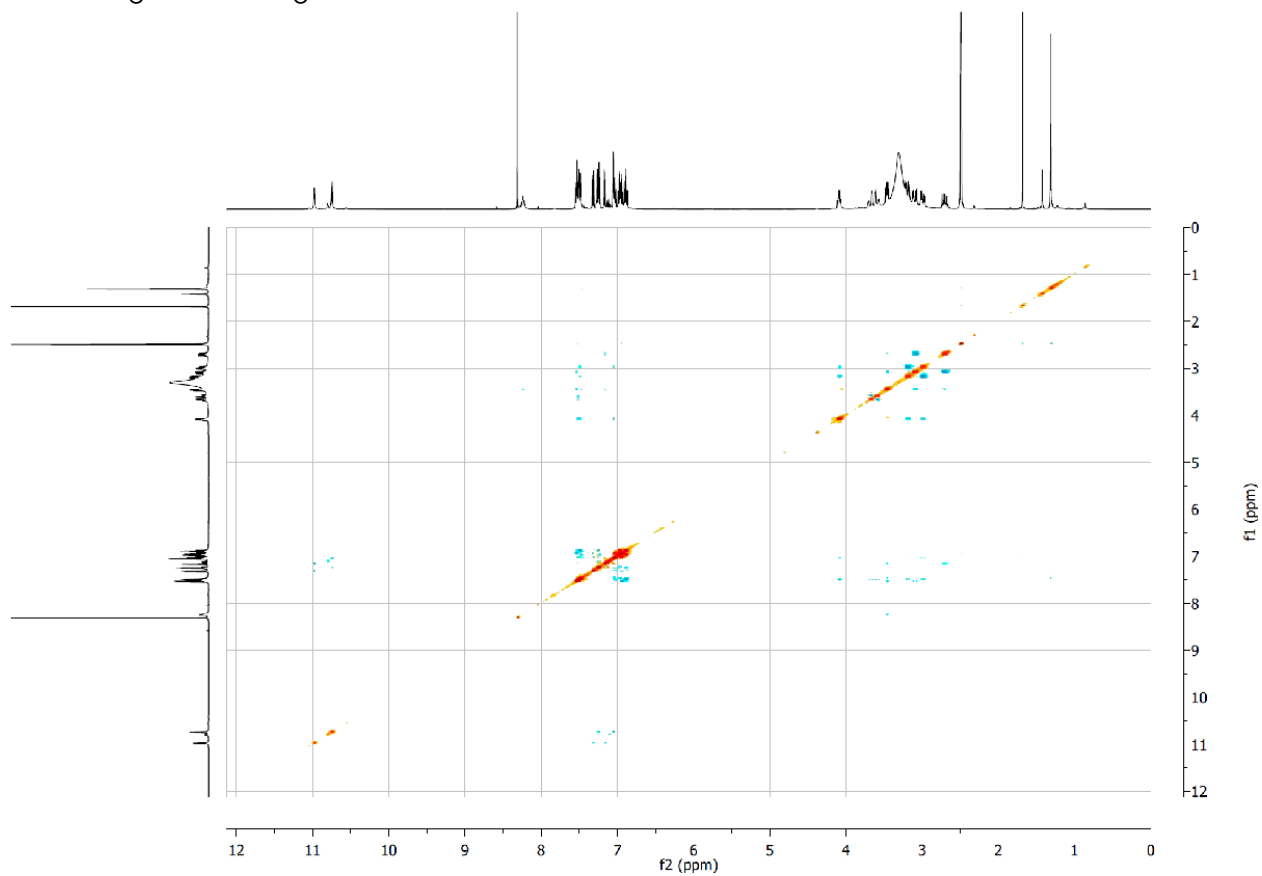

**Figure S17.** ROESY of *Trp-Gly-Trp* (**10**) in DMSO-d<sub>6</sub>.

220523\_014 #15 RT: 0.14 AV: 1 NL: 4.96E+008  
 T: FTMS + p ESI Full ms [100.0000-1500.0000]

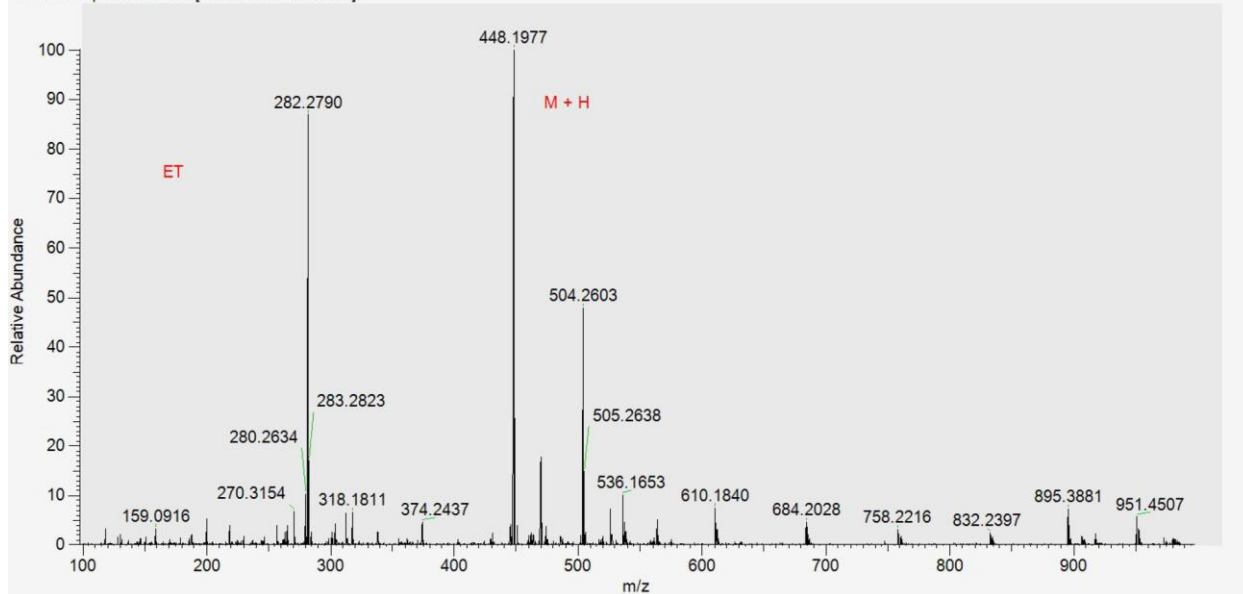

| Display Formula          | S Fit | RDB  | Delta [ppm] | Theo. mass | Combined Score | # Matched Iso. |
|--------------------------|-------|------|-------------|------------|----------------|----------------|
| $C_{25}H_{22}N_9$        | 54,37 | 19,5 | -3,45       | 448,19927  | 97,25          | 4              |
| $C_{23}H_{23}N_9^{23}Na$ | 54,08 | 16,5 | 1,92        | 448,19686  | 97,23          | 4              |
| $C_{24}H_{26}O_4N_5$     | 48,56 | 14,5 | -0,46       | 448,19793  | 96,73          | 4              |

**Figure S18.** Mass spectrum of Trp-Gly-Trp (10).

### 3. Crystallographic data

#### 3.1. Complex of 2,4,6-trinitrobenzenesulfonic acid (3a) with L-tryptophan

**Table S1.** *Crystal data and structure refinement for the complex of 2,4,6-trinitrobenzenesulfonic acid (3a) with L-tryptophan (CCDC 2179406).*

|                                   |                                                                                                           |
|-----------------------------------|-----------------------------------------------------------------------------------------------------------|
| Empirical formula                 | C <sub>17</sub> H <sub>21</sub> N <sub>5</sub> O <sub>14</sub> S                                          |
| Molecular weight                  | 551.45                                                                                                    |
| Temperature                       | 298(2) K                                                                                                  |
| Wavelength                        | 1.54178 Å                                                                                                 |
| Crystal system, space group       | monoclinic, P2 <sub>1</sub> /n                                                                            |
| Unit cell dimensions              | a = 7.0718(2) Å α = 90.00 deg.<br>b = 27.8784(8) Å β = 106.641(2) deg.<br>c = 12.1169(4) Å γ = 90.00 deg. |
| Volume                            | 2288.80(12) Å <sup>3</sup>                                                                                |
| Z, Calculated density             | 4, 1.600 Mg/m <sup>3</sup>                                                                                |
| Absorption coefficient            | 2.033 mm <sup>-1</sup>                                                                                    |
| F(000)                            | 1144                                                                                                      |
| Crystal size                      | 0.12 x 0.10 x 0.08 mm                                                                                     |
| Theta range for data collection   | 3.17 to 67.23 deg.                                                                                        |
| Limiting indexes                  | -8 ≤ h ≤ 7, -32 ≤ k ≤ 32, -12 ≤ l ≤ 14                                                                    |
| Reflections collected / unique    | 15152 / 3866 (R <sub>int</sub> = 0.0397)                                                                  |
| Refinement method                 | Full-matrix least-squares on F <sup>2</sup>                                                               |
| Data / restraints / parameters    | 3866 / 0 / 360                                                                                            |
| Goodness-of-fit on F <sup>2</sup> | 1.059                                                                                                     |
| Final R indexes [I > 2σ(I)]       | R1 = 0.0488, wR2 = 0.1292                                                                                 |
| R indexes (all data)              | R1 = 0.0577, wR2 = 0.1399                                                                                 |
| Largest diff. peak and hole       | 0.396 and -0.358 e. Å <sup>-3</sup>                                                                       |
| Diffractometer model              | Bruker Kappa Apex II                                                                                      |

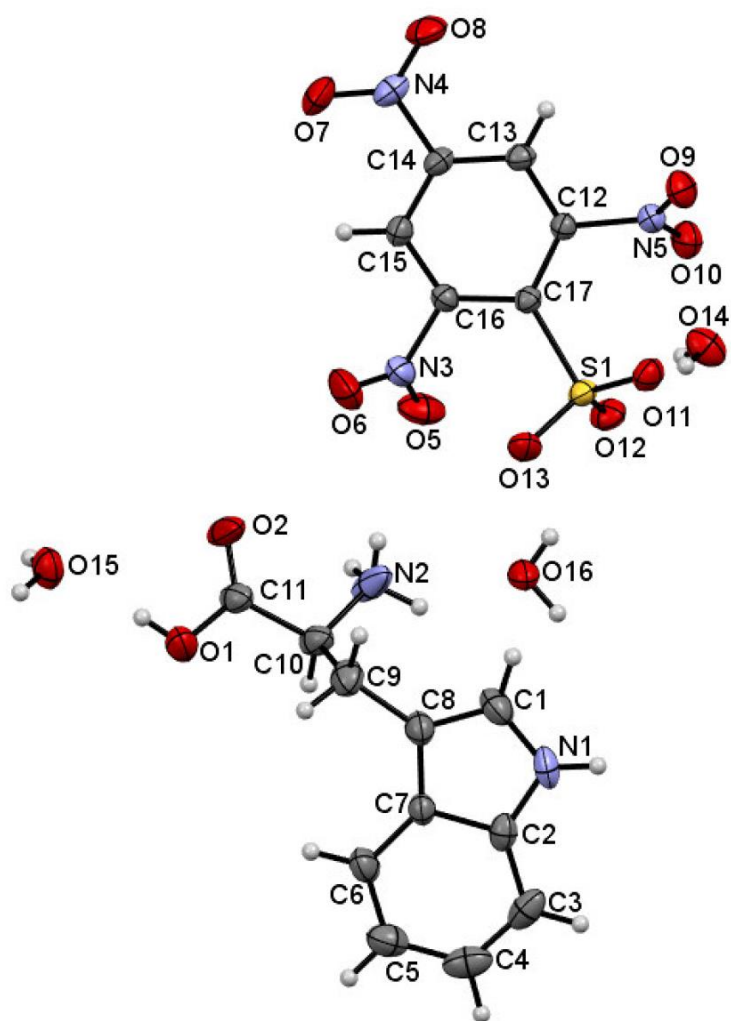

**Figure S19.** ORTEP representation for the associate of 2,4,6-trinitrobenzene sulfonic acid (**3a**) with L-tryptophan (CCDC 2179406).

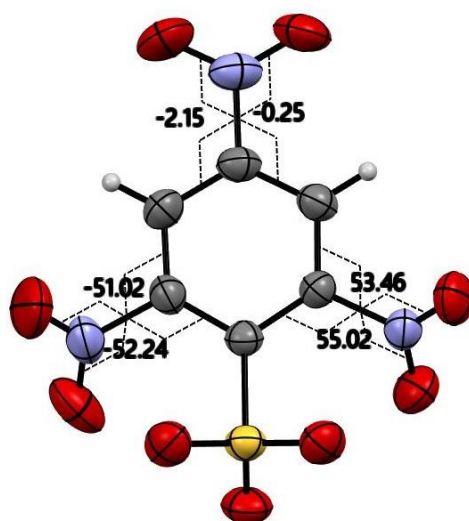

**Figure S20.** 2,4,6-trinitrobenzene sulfonic acid (**3a**) torsion angles.

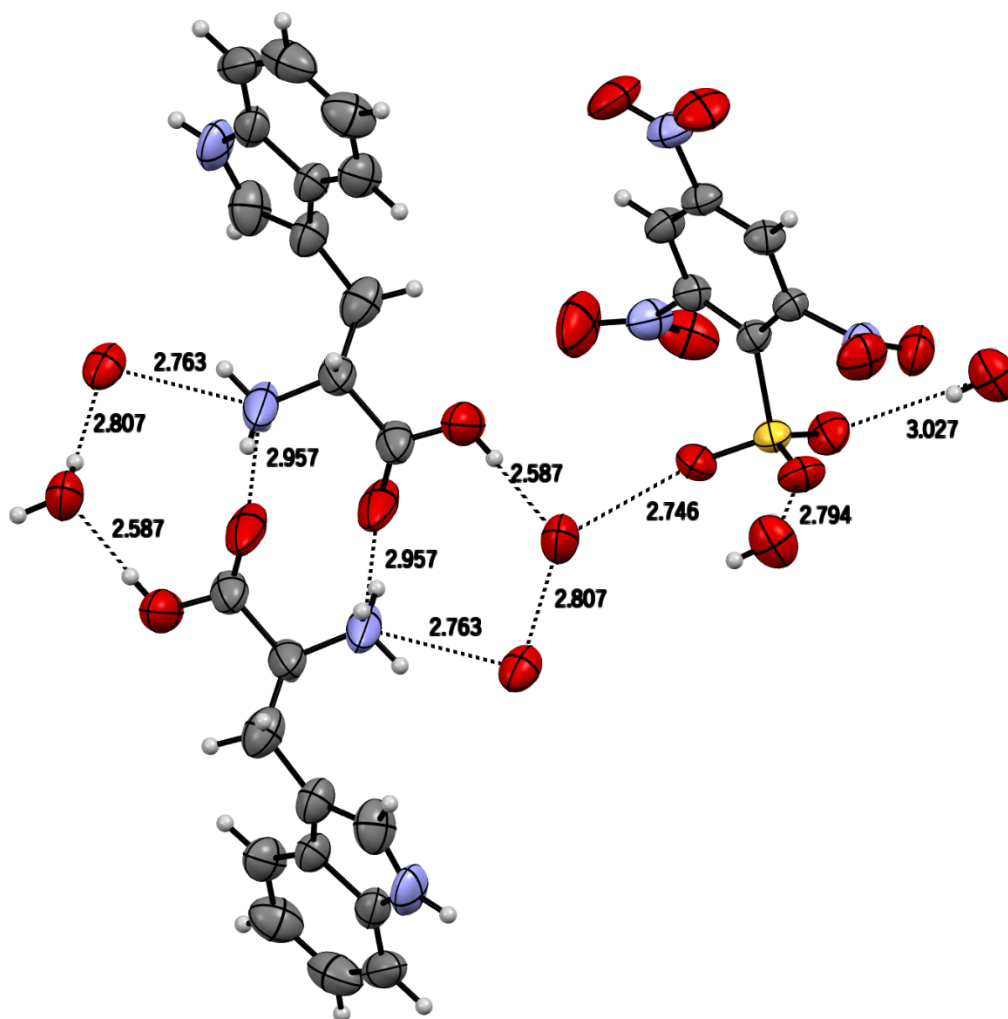

**Figure S21.** Crystal structure for the complex showing hydrogen bonds by dotted lines and including crystallization water molecules.

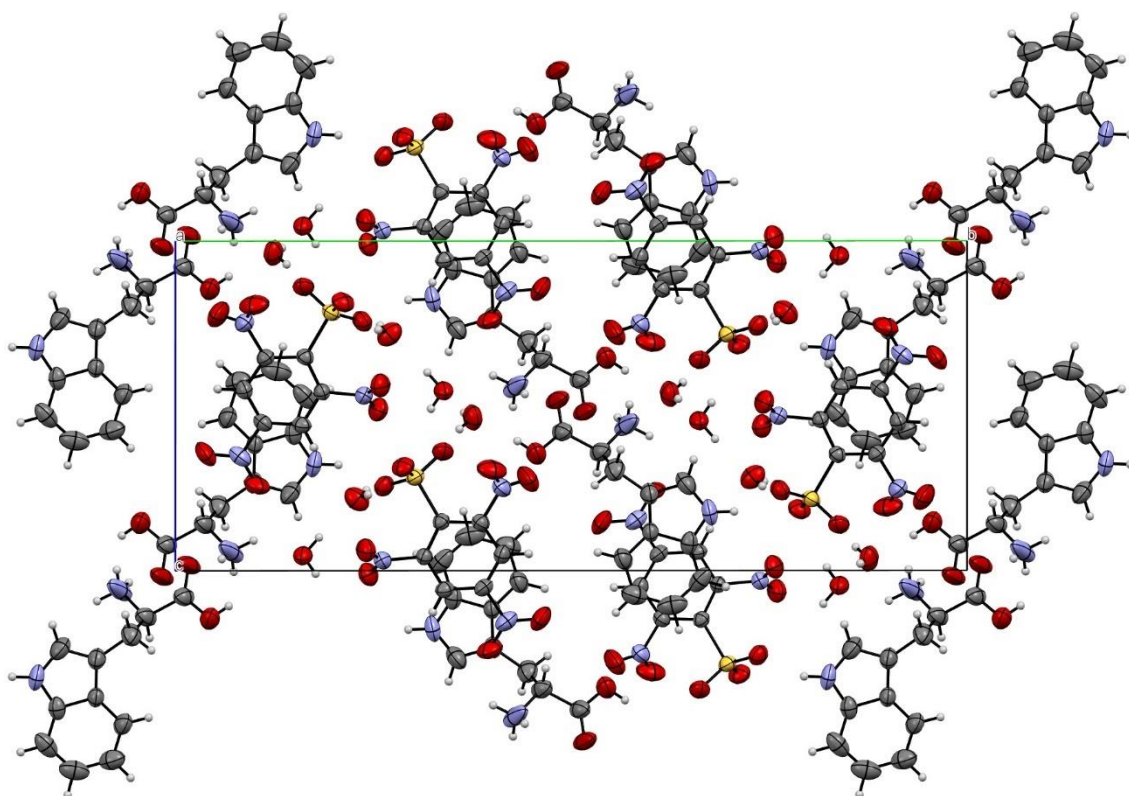

**Figure S22.** *Crystal packing of the complex viewed along the [100] direction of the unit cell.*

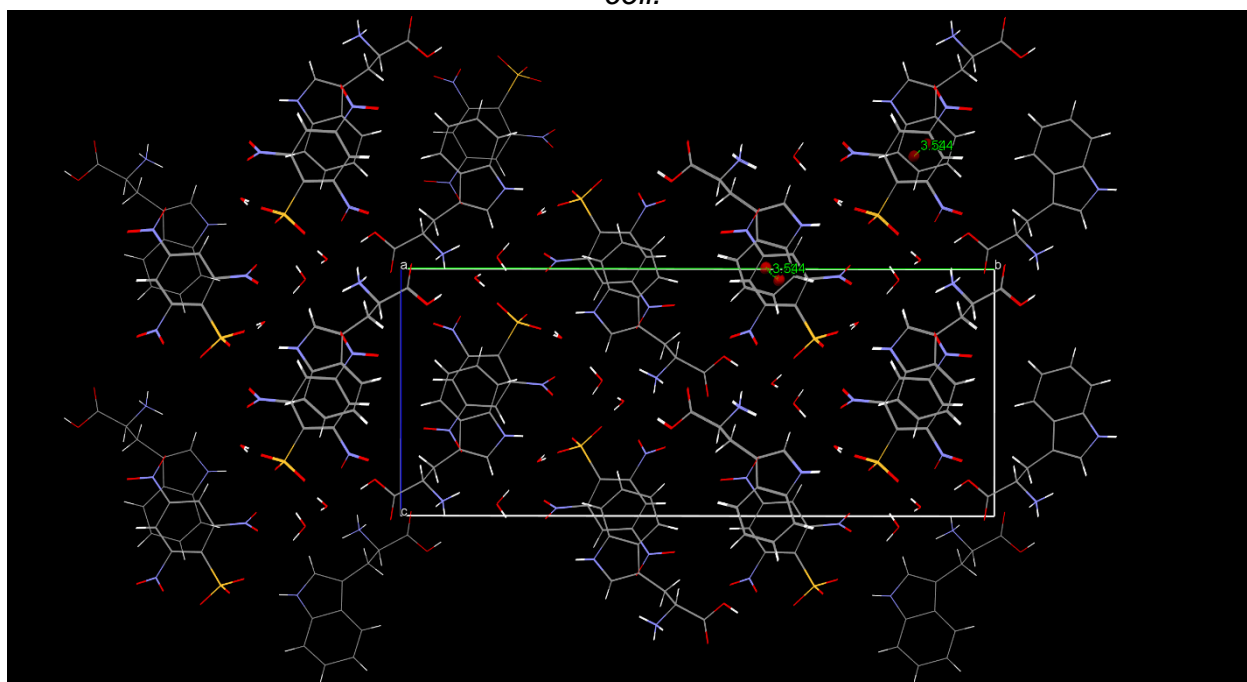

**Figure S23.** *Crystal packing of the complex viewed along the [100] direction of the unit cell, showing distance between centroids.*

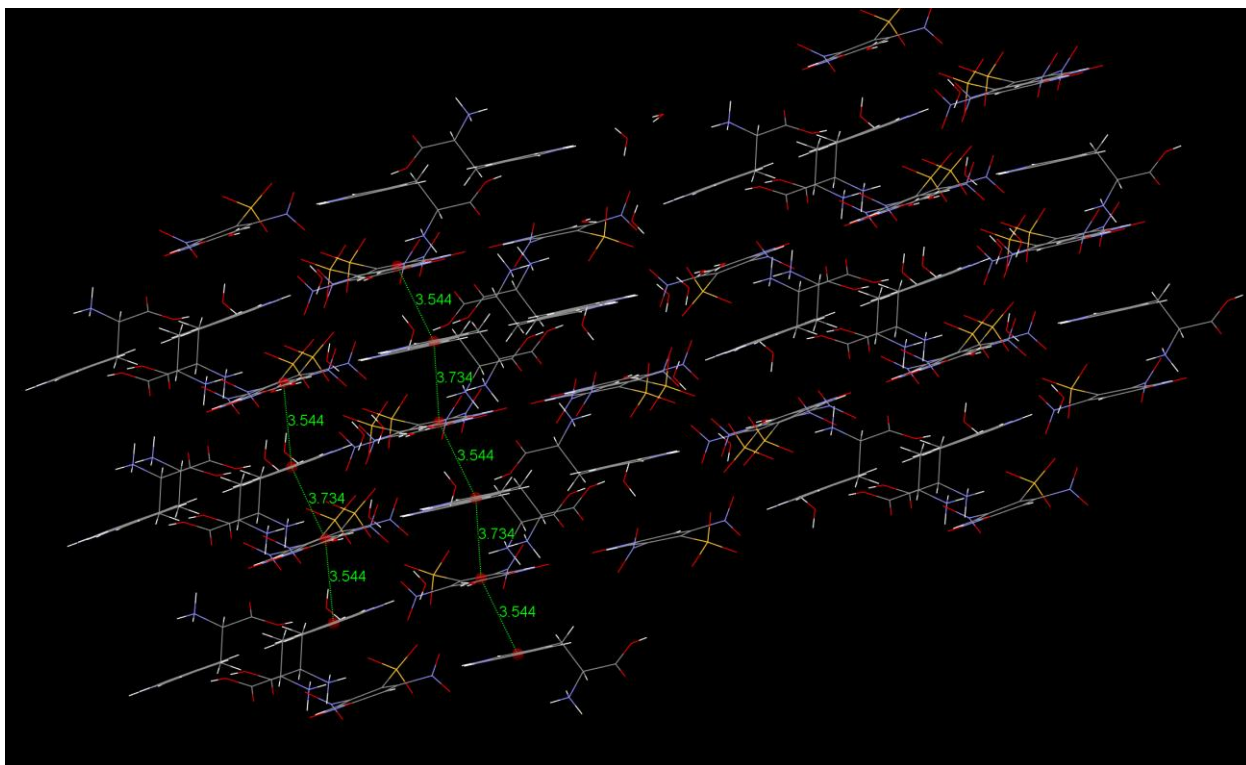

**Figure S24.** *Crystal packing of the complex showing the nearly parallel stacking and the distance between centroids.*

### 3.2. Complex of 3,5-dinitrobenzoic acid (4a) with L-tryptophan

**Table S2.** *Crystal data and structure refinement for 3,5-dinitrobenzoic acid (4a) with L-tryptophan.*

|                                   |                                                                                                                             |
|-----------------------------------|-----------------------------------------------------------------------------------------------------------------------------|
| Empirical formula                 | C <sub>19</sub> H <sub>20</sub> N <sub>4</sub> O <sub>9</sub>                                                               |
| Molecular weight                  | 448.39                                                                                                                      |
| Temperature                       | 298(2) K                                                                                                                    |
| Wavelength                        | 1.54178 Å                                                                                                                   |
| Crystal system, space group       | monoclinic, P2 <sub>1</sub> /n                                                                                              |
| Unit cell dimensions              | a = 7.2094(4) Å $\alpha$ = 90.00 deg.<br>b = 7.5386(3) Å $\beta$ = 98.214(3) deg.<br>c = 19.1587(8) Å $\gamma$ = 90.00 deg. |
| Volume                            | 1030.57(8) Å <sup>3</sup>                                                                                                   |
| Z, Calculated density             | 2, 1.445 Mg/m <sup>3</sup>                                                                                                  |
| Absorption coefficient            | 0.999 mm <sup>-1</sup>                                                                                                      |
| F(000)                            | 468                                                                                                                         |
| Crystal size                      | 0.15 x 0.12 x 0.10 mm                                                                                                       |
| Theta range for data collection   | 2.33 to 66.72 deg.                                                                                                          |
| Limiting indexes                  | -8 ≤ h ≤ 8, -8 ≤ k ≤ 6, -22 ≤ l ≤ 22                                                                                        |
| Reflections collected / unique    | 7296 / 2586 (R <sub>int</sub> = 0.0291)                                                                                     |
| Refinement method                 | Full-matrix least-squares on F <sup>2</sup>                                                                                 |
| Data / restraints / parameters    | 2586 / 2 / 283                                                                                                              |
| Goodness-of-fit on F <sup>2</sup> | 1.060                                                                                                                       |
| Final R indexes [I > 2σ(I)]       | R1 = 0.0528, wR2 = 0.1483                                                                                                   |
| R indexes (all data)              | R1 = 0.0565, wR2 = 0.1521                                                                                                   |
| Largest diff. peak and hole       | 0.614 and -0.354 e. Å <sup>-3</sup>                                                                                         |
| Diffractometer model              | Bruker Kappa Apex II                                                                                                        |



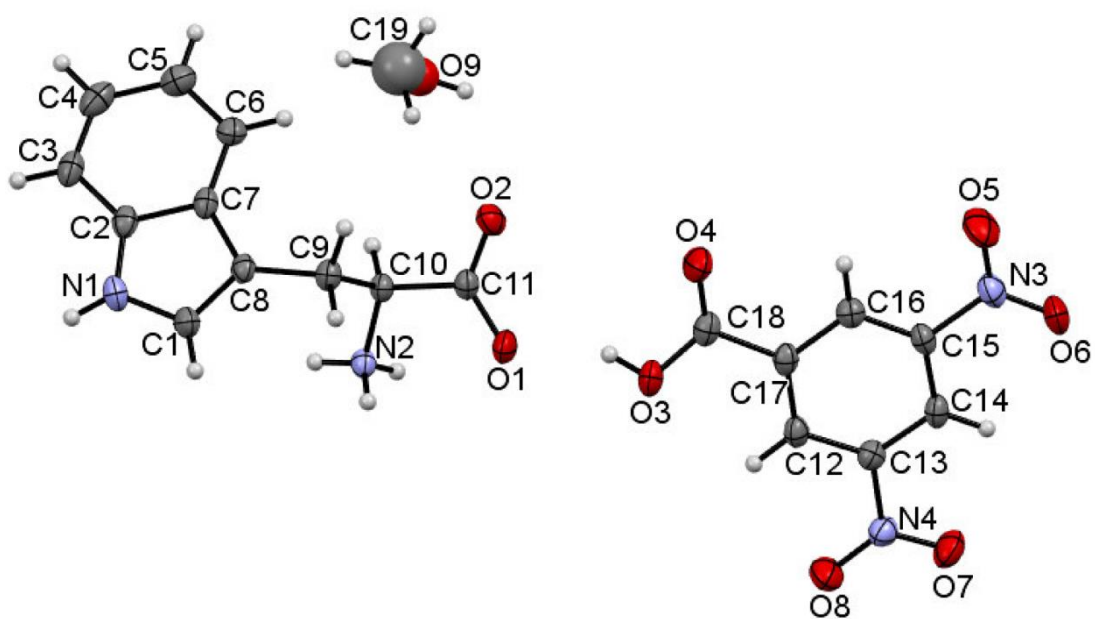

**Figure S25.** ORTEP representation for the associate of 3,5-dinitrobenzoic acid (**4a**) with *L*-tryptophan (CCDC 2179399).

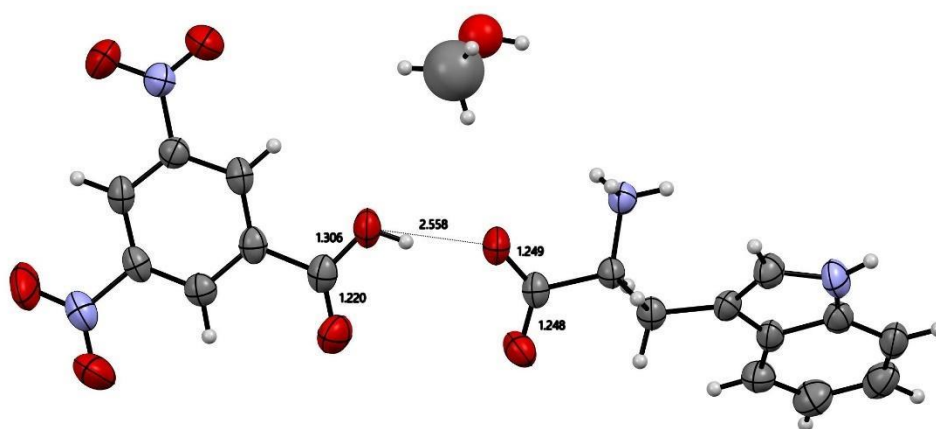

**Figure S26.** *Crystal structure of the complex showing C-O bond lengths and the intermolecular H-bond between Trp and 4a.*

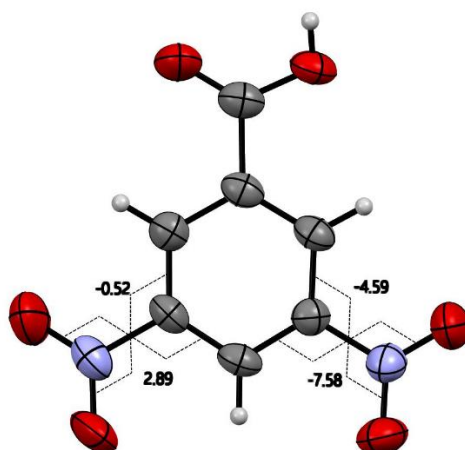

**Figure S27.** *3,5-dinitrobenzoic acid (4a) torsion angles.*

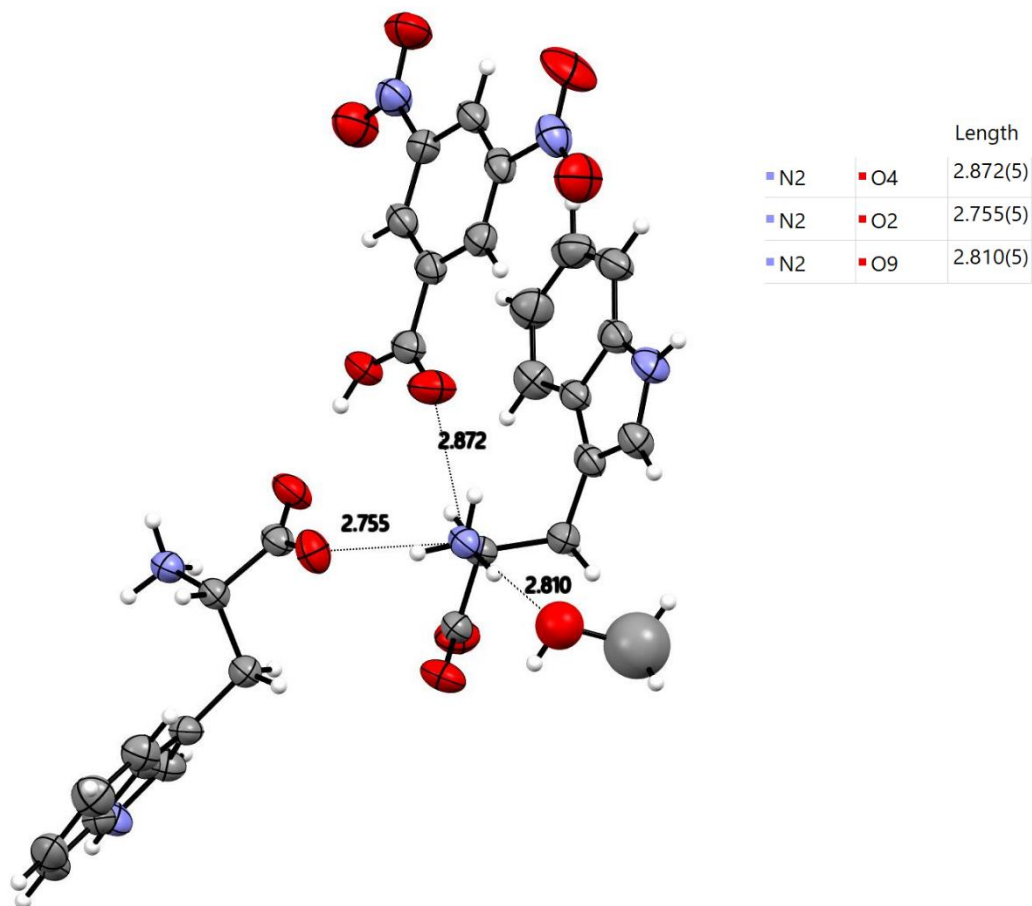

**Figure S28.** *H-bonds around the ammonium group indicated by dotted lines.*

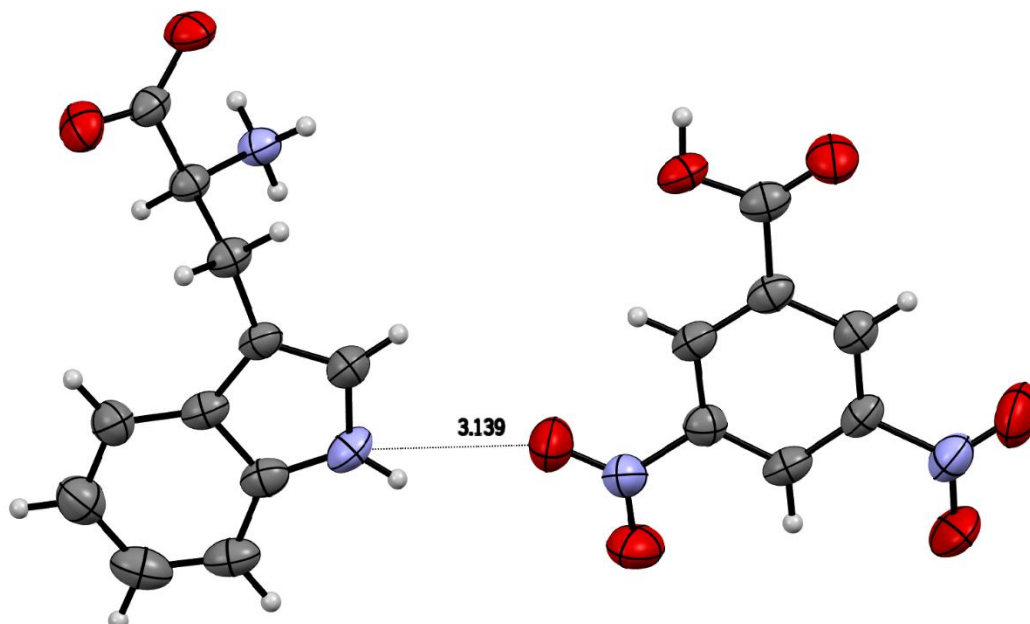

**Figure S29.** *H-bond between indole NH and one of the nitro groups (3.139 Å) indicated by dotted lines.*

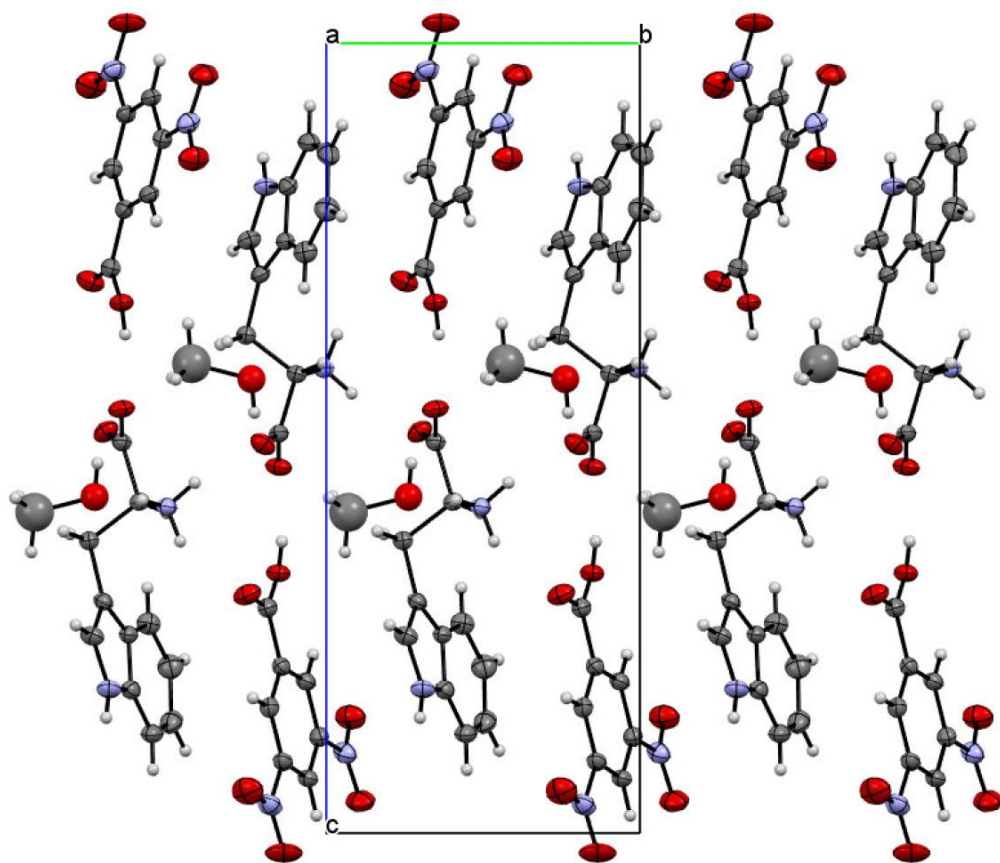

**Figure S30.**  $\pi$ - $\pi$  stacking interactions between *L*-tryptophan and 3,5-dinitrobenzoic acid (4a).

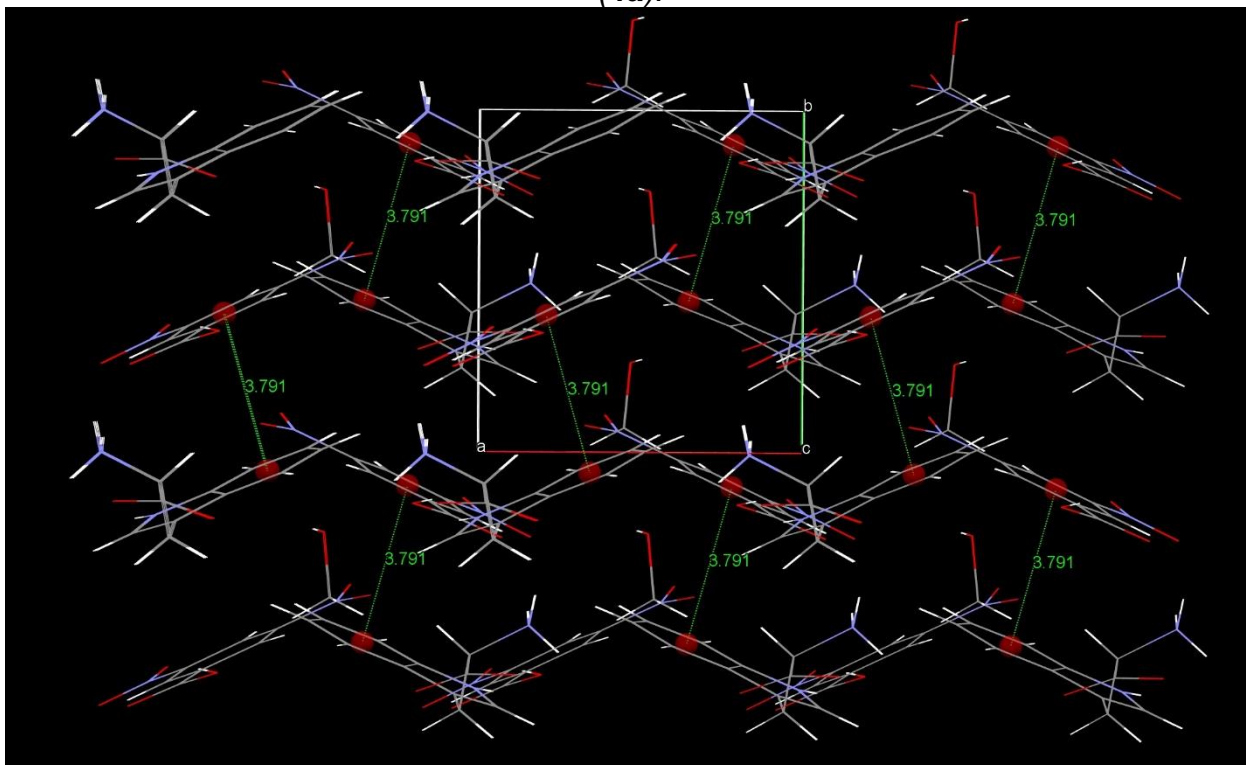

**Figure S31.** Crystal packing of the complex showing the  $\pi$ - $\pi$  stacking and the distance between centroids.

### 3.3. Complex of 2,4,6-trinitrobenzoic acid (5a) with L-tryptophan

**Table S3.** *Crystal data and structure refinement for 2,4,6-trinitrobenzoic acid (5a) with L-tryptophan.*

|                                   |                                                                                                                               |
|-----------------------------------|-------------------------------------------------------------------------------------------------------------------------------|
| Empirical formula                 | C <sub>18</sub> H <sub>15</sub> N <sub>5</sub> O <sub>10</sub>                                                                |
| Molecular weight                  | 461.35                                                                                                                        |
| Temperature                       | 298(2) K                                                                                                                      |
| Wavelength                        | 1.54178 Å                                                                                                                     |
| Crystal system, space group       | monoclinic, P2 <sub>1</sub> /n                                                                                                |
| Unit cell dimensions              | a = 6.9989(2) Å $\alpha$ = 90.00 deg.<br>b = 9.8927(3) Å $\beta$ = 97.0060(10) deg.<br>c = 28.2400(7) Å $\gamma$ = 90.00 deg. |
| Volume                            | 1940.68(9) Å <sup>3</sup>                                                                                                     |
| Z, Calculated density             | 2, 1.579 Mg/m <sup>3</sup>                                                                                                    |
| Absorption coefficient            | 1.140 mm <sup>-1</sup>                                                                                                        |
| F(000)                            | 952                                                                                                                           |
| Crystal size                      | 0.16 x 0.14 x 0.12 mm                                                                                                         |
| Theta range for data collection   | 3.15 to 67.10 deg.                                                                                                            |
| Limiting indexes                  | -8 ≤ h ≤ 5, -11 ≤ k ≤ 11, -33 ≤ l ≤ 31                                                                                        |
| Reflections collected / unique    | 13813 / 3262 (R <sub>int</sub> = 0.0267)                                                                                      |
| Refinement method                 | Full-matrix least-squares on F <sup>2</sup>                                                                                   |
| Data / restraints / parameters    | 3262 / 0 / 301                                                                                                                |
| Goodness-of-fit on F <sup>2</sup> | 1.042                                                                                                                         |
| Final R indexes [I > 2σ(I)]       | R1 = 0.0378, wR2 = 0.1001                                                                                                     |
| R indexes (all data)              | R1 = 0.0411, wR2 = 0.1028                                                                                                     |
| Largest diff. peak and hole       | 0.237 and -0.261 e. Å <sup>-3</sup>                                                                                           |
| Diffractometer model              | Bruker Kappa Apex II                                                                                                          |

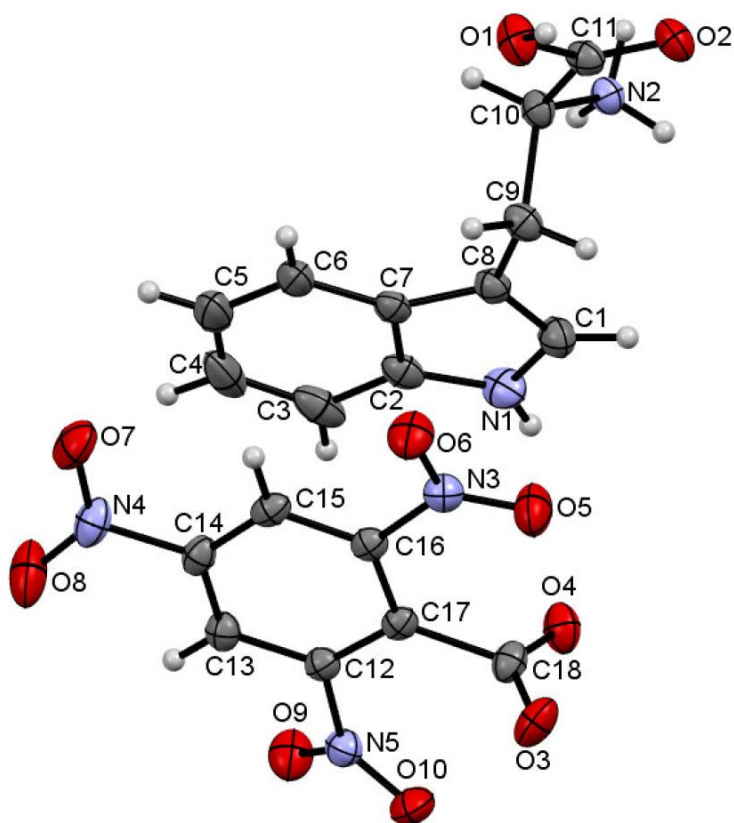

**Figure S32.** ORTEP representation for the associate of 2,4,6-trinitrobenzoic acid (**5a**) with L-tryptophan (CCDC 2179404).

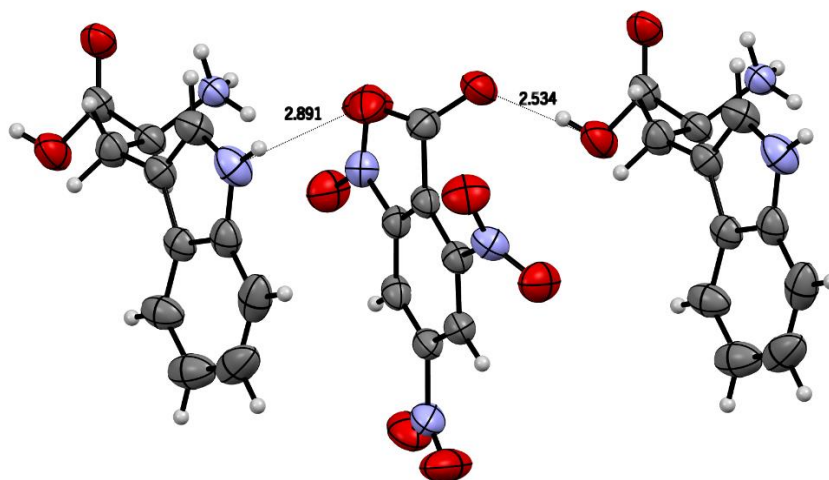

**Figure S33.** H-bond interactions between trinitrobenzoic acid carboxylate with two tryptophan molecules.

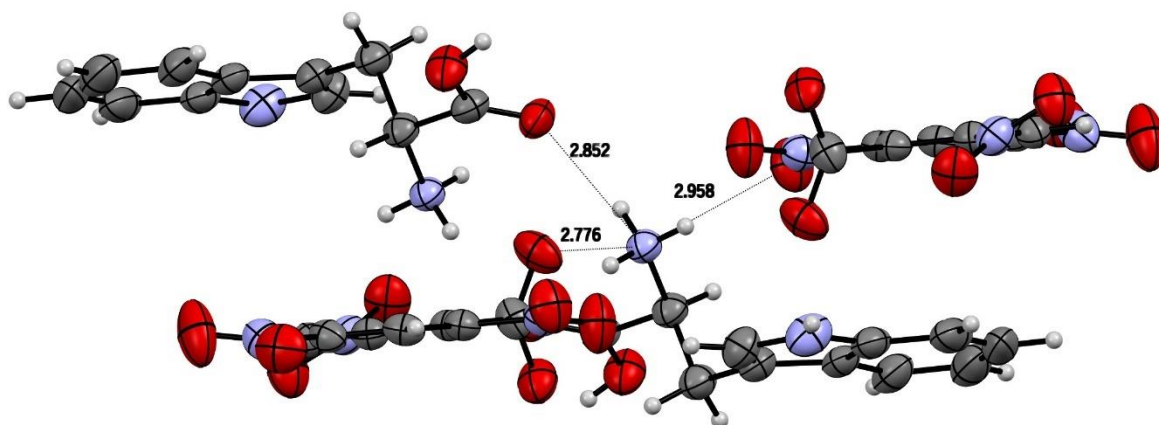

**Figure S34.** Three H-bonds around the ammonium group indicated by dotted lines.

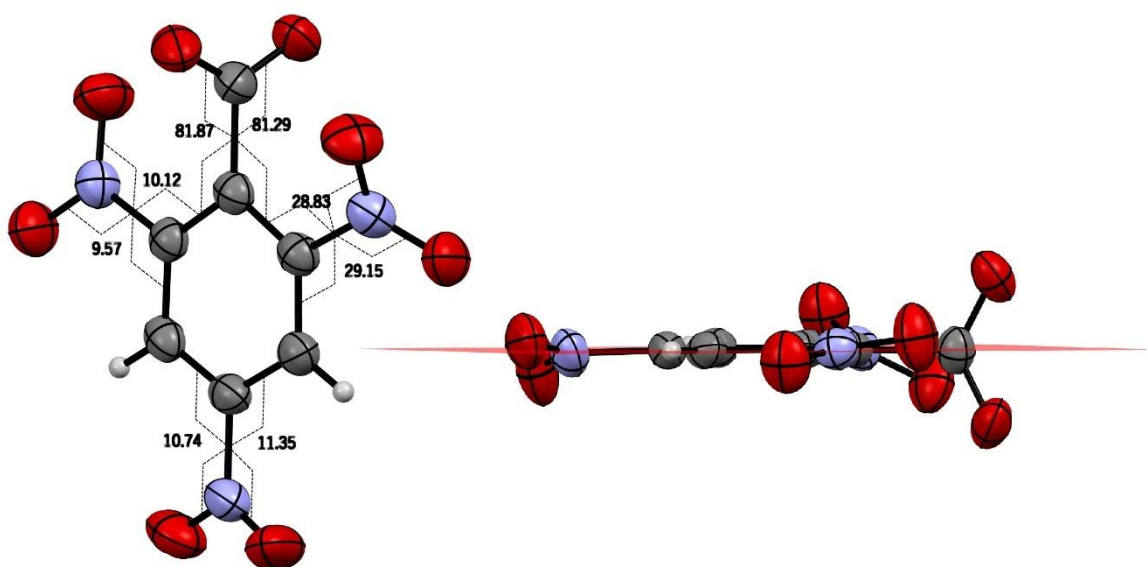

**Figure S35.** Torsion angles of 2,4,6-trinitrobenzoic acid (5a).

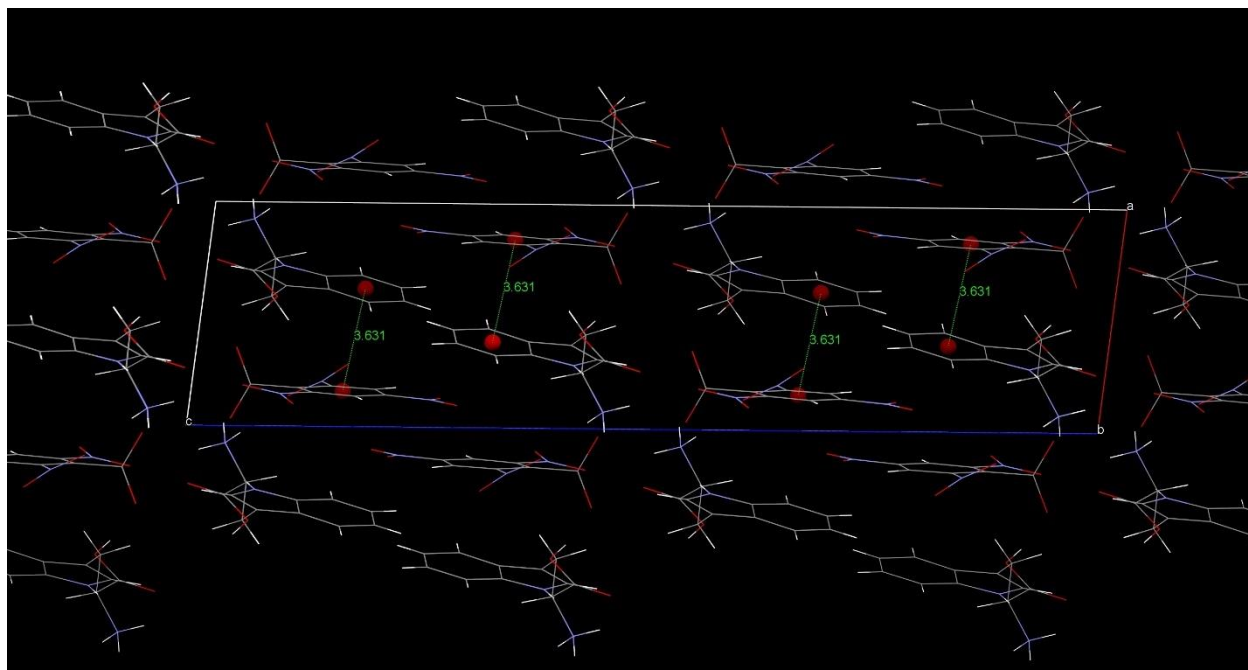

**Figure S36.** *Crystal packing of the complex showing the  $\pi$ - $\pi$  stacking and the distance between centroids. Crystallization solvent molecules have been omitted for clarity.*



### 3.4. Complex of *N,N'*-bis(glyciny)pyromellitic diimide (6a) with L-tryptophan

**Table S4.** *Crystal data and structure refinement for receptor 6a with L-tryptophan.*

|                                              |                                                                                                                 |
|----------------------------------------------|-----------------------------------------------------------------------------------------------------------------|
| Empirical formula                            | C <sub>36</sub> H <sub>32</sub> N <sub>6</sub> O <sub>14</sub>                                                  |
| Molecular weight                             | 772.68                                                                                                          |
| Temperature                                  | 298(2) K                                                                                                        |
| Wavelength                                   | 1.54178 Å                                                                                                       |
| Crystal system, space group                  | triclinic, P1                                                                                                   |
| Unit cell dimensions                         | a = 8.3904(3) Å α = 77.406(2) deg.<br>b = 9.2903(3) Å β = 89.956(2) deg.<br>c = 11.4586(4) Å γ = 77.501(2) deg. |
| Volume                                       | 850.03(5) Å <sup>3</sup>                                                                                        |
| Z, Calculated density                        | 1, 1.509 Mg/m <sup>3</sup>                                                                                      |
| Absorption coefficient                       | 1.006 mm <sup>-1</sup>                                                                                          |
| F(000)                                       | 402                                                                                                             |
| Crystal size                                 | 0.15 x 0.14 x 0.10 mm                                                                                           |
| Theta range for data collection              | 3.96 to 66.66 deg.                                                                                              |
| Limiting indexes                             | -9 ≤ h ≤ 8, -10 ≤ k ≤ 10, -12 ≤ l ≤ 13                                                                          |
| Reflections collected / unique               | 5774 / 3144 (R <sub>int</sub> = 0.0209)                                                                         |
| Refinement method                            | Full-matrix least-squares on F <sup>2</sup>                                                                     |
| Data / restraints / parameters               | 3144 / 3 / 510                                                                                                  |
| Goodness-of-fit on F <sup>2</sup>            | 1.106                                                                                                           |
| Final R indexes [ <i>I</i> > 2σ( <i>I</i> )] | R1 = 0.0369, wR2 = 0.1091                                                                                       |
| R indexes (all data)                         | R1 = 0.0382, wR2 = 0.1107                                                                                       |
| Largest diff. peak and hole                  | 0.438 and -0.166 e. Å <sup>-3</sup>                                                                             |
| Diffractometer model                         | Bruker Kappa Apex II                                                                                            |

1

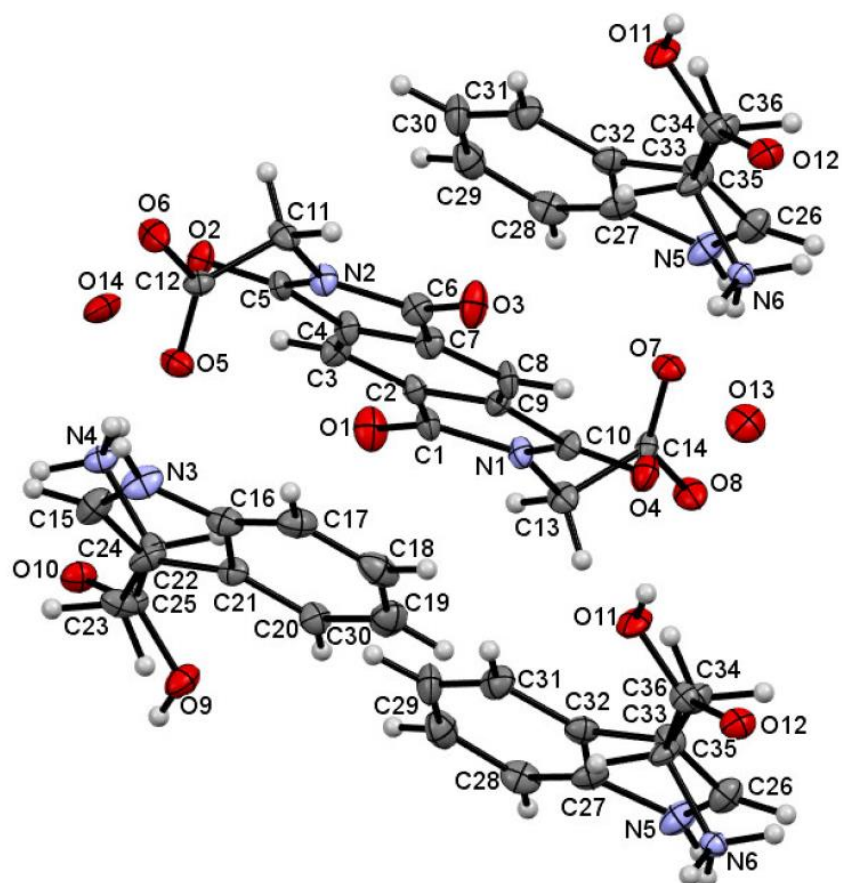

**Figure S37.** ORTEP representation for the associate of *N,N'*-bis(glyciny)pyromellitic diimide (**6a**) with L-tryptophan (CCDC 2179405).

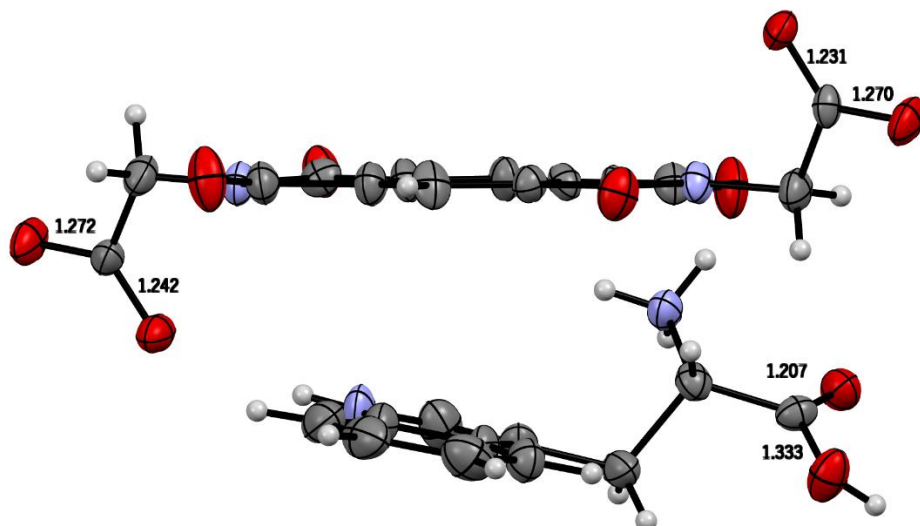

**Figure S38.** C-O bond lengths for the Trp carboxyl and receptor 6 carboxylate groups.

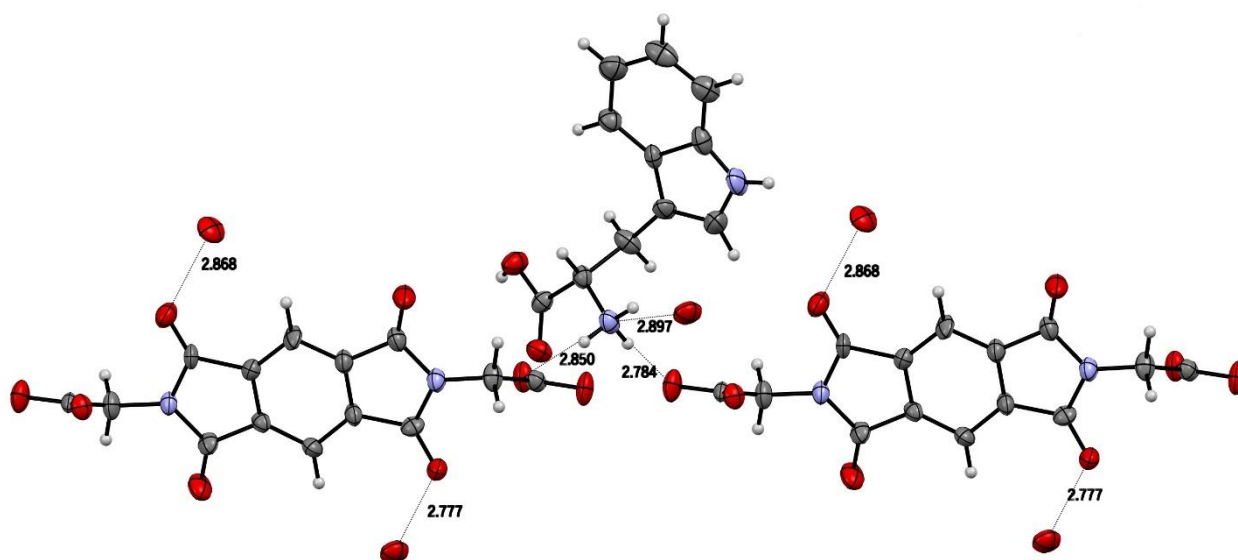

**Figure S39.** H-bonds around the Trp ammonium group and diimide carbonyl groups indicated by dotted lines.

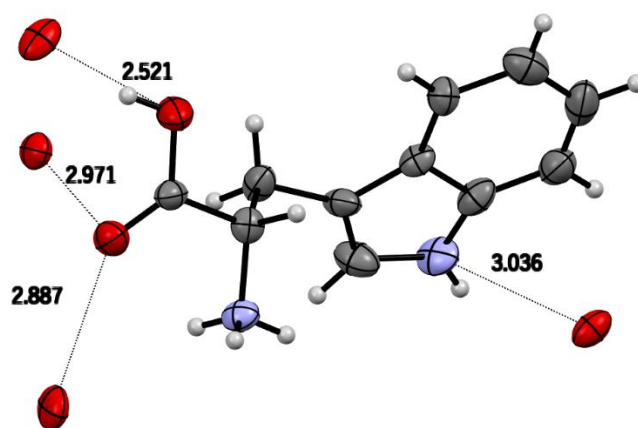

**Figure S40.** H-bonds around the Trp carboxylic group and indole NH indicated by dotted lines.

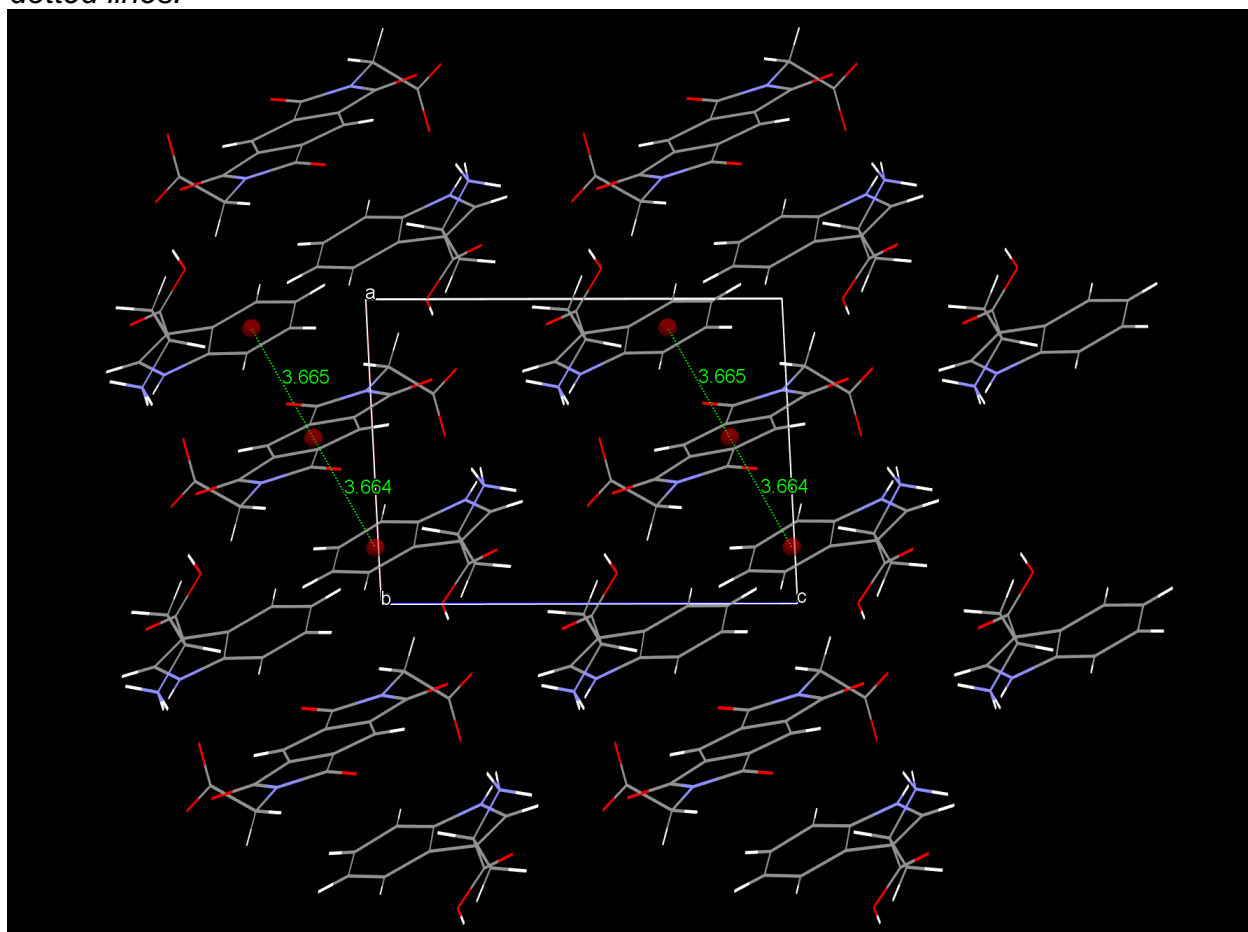

**Figure S41.** Crystal packing of the complex showing the  $\pi$ - $\pi$  stacking and the distance between centroids. Crystallization water molecules have been omitted for clarity.

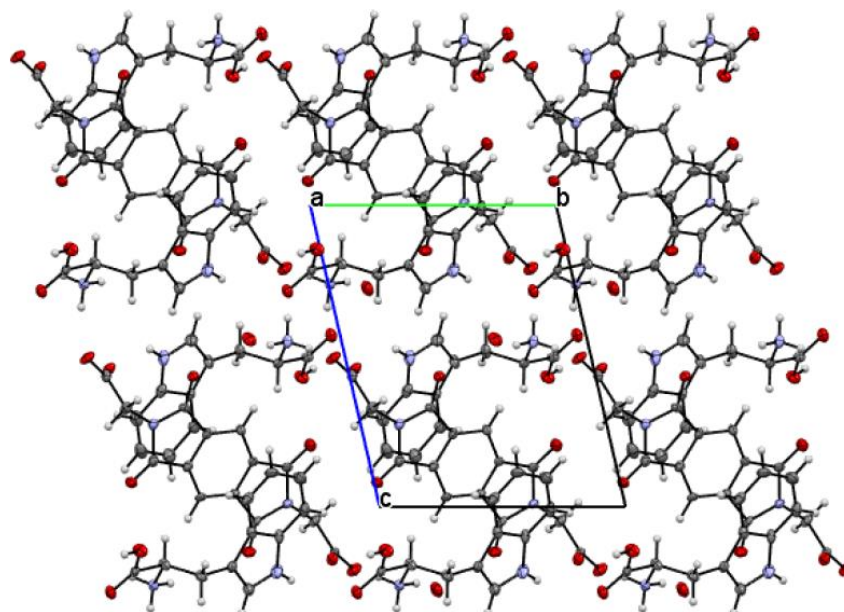

**Figure S42.** *Crystal packing of the complex viewed along the [100] direction of the unit cell.*

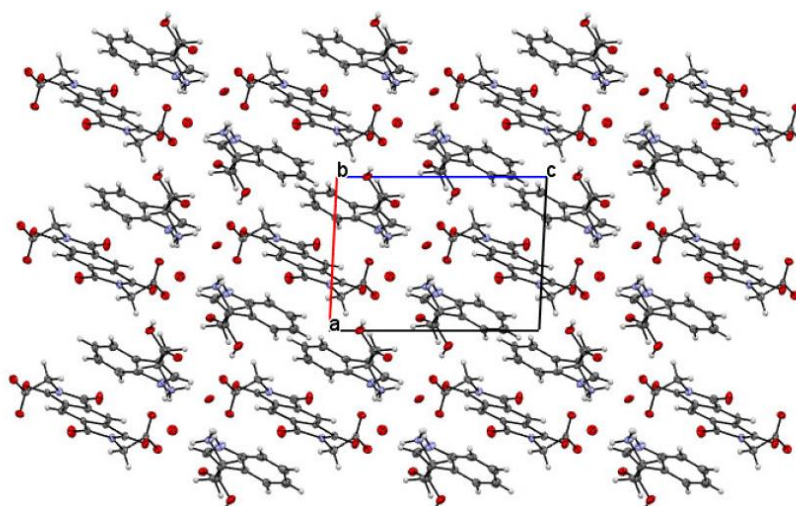

**Figure S43.** *Crystal packing of the complex viewed along the [010] direction of the unit cell.*

## 4. UV-vis studies with tryptophan

### 4.1. Sodium 2,4,6-trinitrobenzene sulfonate (3b)

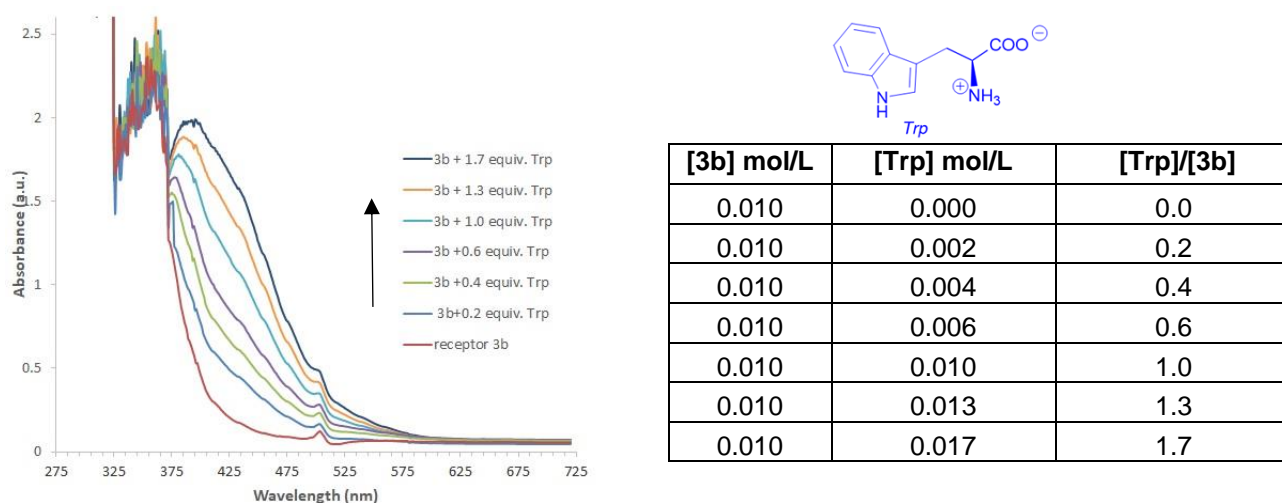

**Figure S44.** UV-vis spectra (250-725 nm) corresponding to the titration of sodium 2,4,6-trinitrobenzenesulfonate (**3b**) with L-Trp.

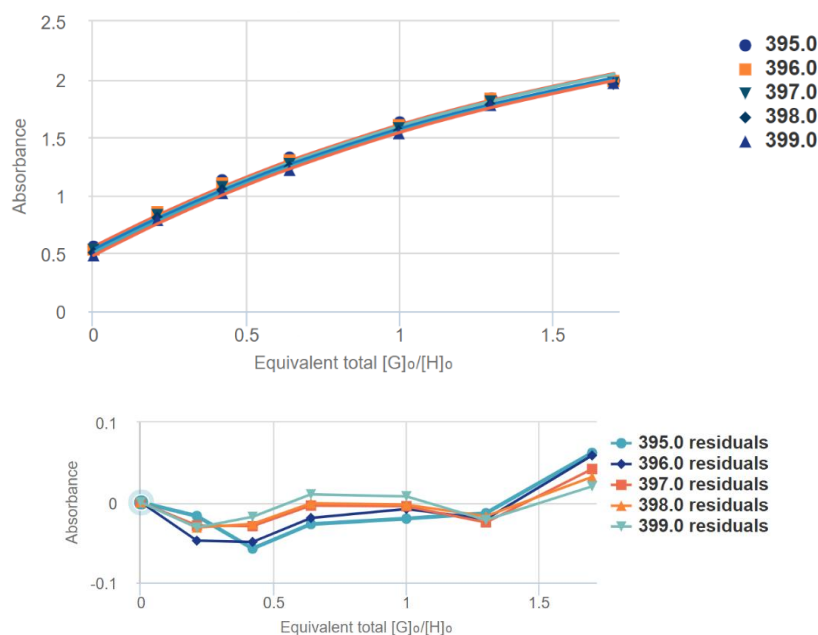

**Figure S45.** Binding isotherm for the 1:1 receptor **3b**:Trp binding and the residual error obtained from fitting using Bindfit

|                                                 |
|-------------------------------------------------|
| UV 1:1 ( $\lambda = 375\text{-}445\text{ nm}$ ) |
| $K_d = 87(\pm 1.2\%) \text{ M}^{-1}$            |
| Covariance = 4.8309e-3                          |

<http://app.supramolecular.org/bindfit/view/9845d3a9-fb69-4025-bb0b-b1050235e3b1>

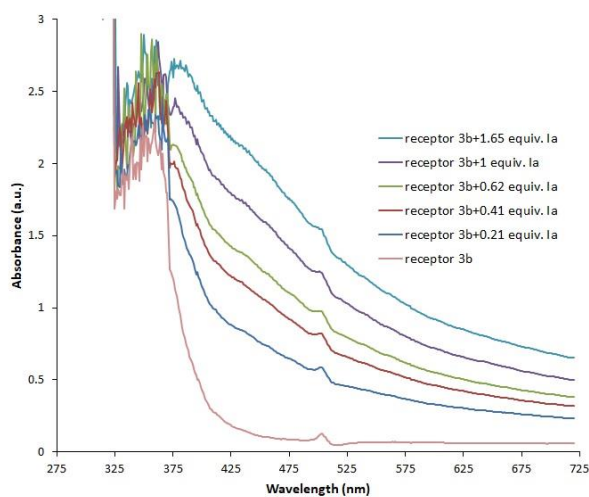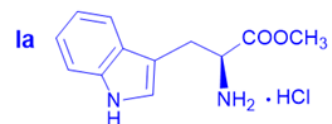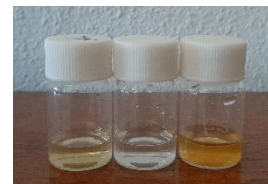

**3b**      **1a**      complex

**Figure S46.** UV-vis spectra (250-725 nm) corresponding to the titration of sodium 2,4,6-trinitrobenzenesulfonate (**3b**, 0.01M) with L-Trp methyl ester hydrochloride (**1a**).

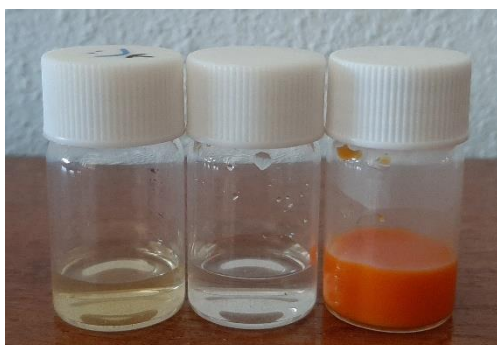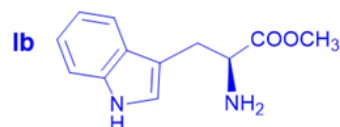

**Figure S47.** Left: solution of receptor **3b** (0.01M) in H<sub>2</sub>O. Middle: solution of tryptophan methyl ester (**1b**, (0.01M)) in H<sub>2</sub>O. Right: complex in H<sub>2</sub>O.

#### 4.2. 3,5- dinitrobenzoic acid (4a)

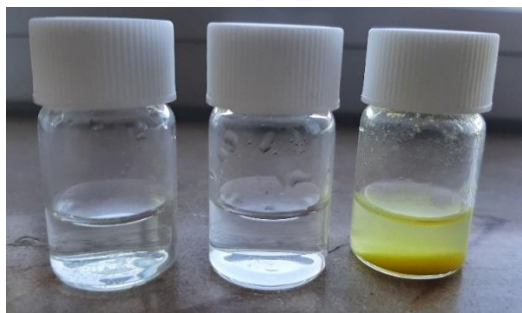

**Figure S48.** Left: solution of receptor **4a** (0.01M) in H<sub>2</sub>O. Middle: solution of L-Trp (0.01M) in H<sub>2</sub>O. Right: solution of complex in H<sub>2</sub>O.

#### 4.3. 2,4,6- trinitrobenzoic acid (5a)

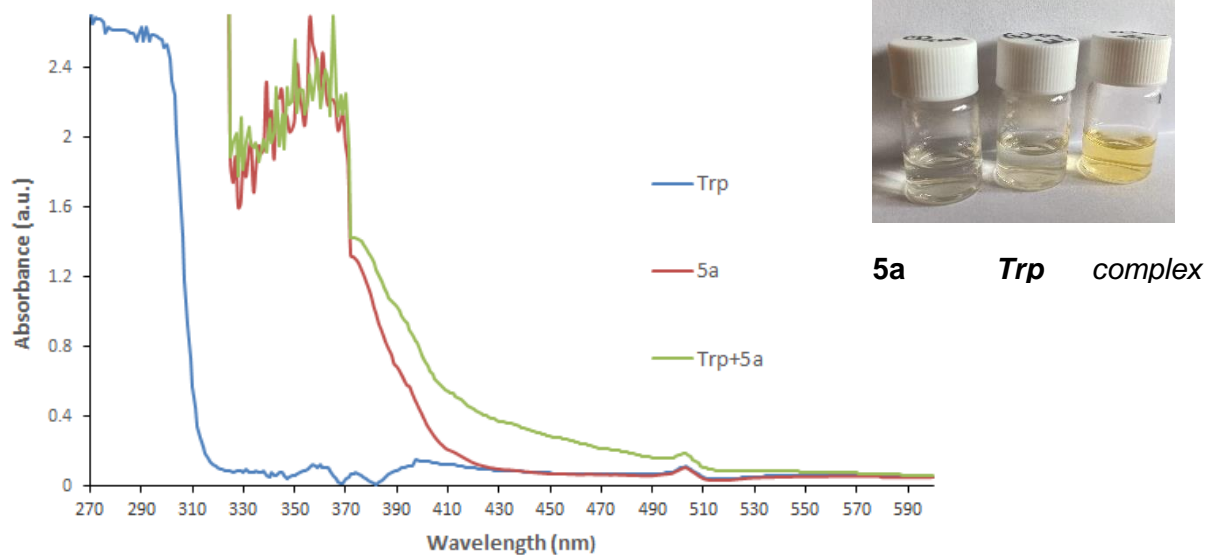

**Figure S49.** UV-Vis spectra (250-600 nm) of 2,4,6-trinitrobenzoic acid (**5a**, 0.01M, red line), L-Trp (0.01M, blue line) and the complex between 2,4,6-trinitrobenzoic acid (**5a**) and L-Trp (green line).



#### 4.4. *N,N'*-bis(glyciny)pyromellitic diimide (**6b**)

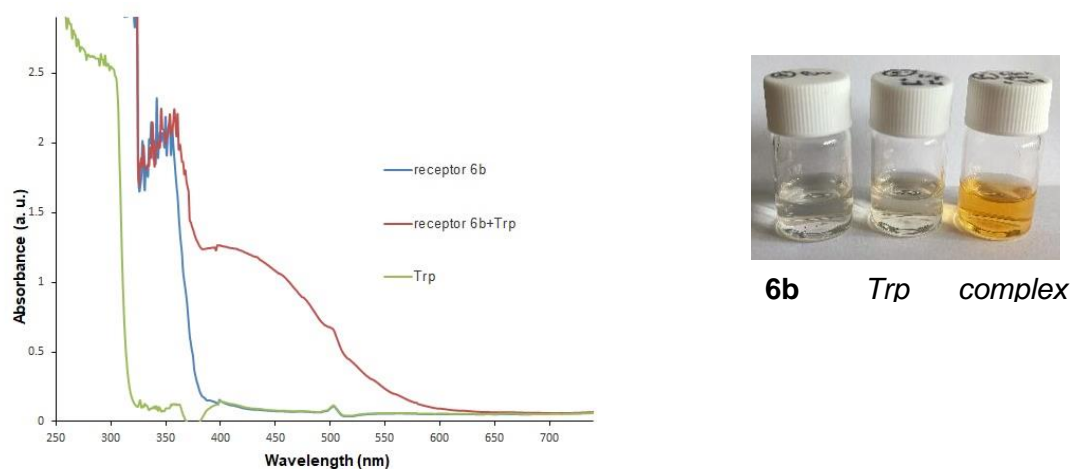

**Figure S50.** UV-Vis spectra (250-700 nm) of diimide **6b**, 0.01M, blue line), L-Trp (0.01M, green line) and the complex between 2,4,6-trinitrobenzoic acid (**5a**) and L-Trp (red line).

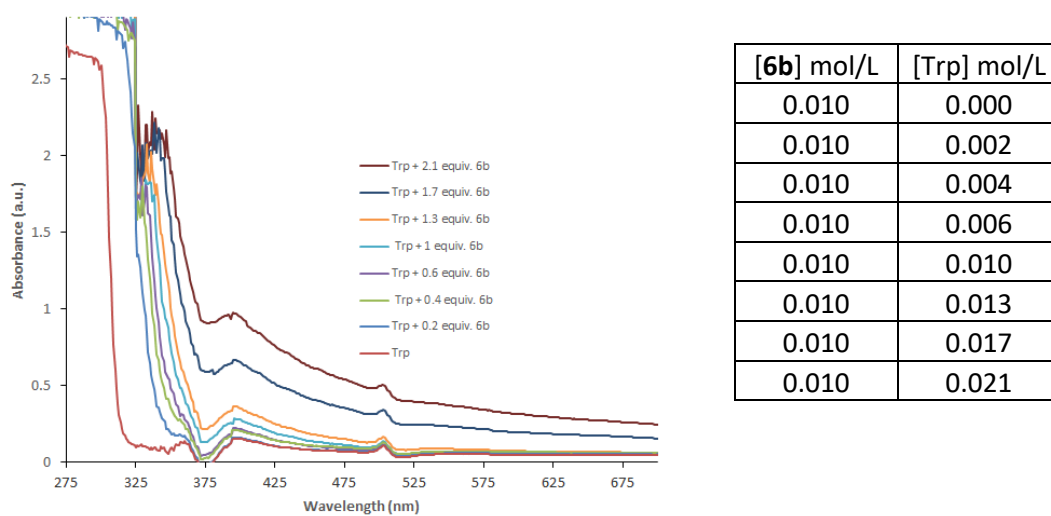

**Figure S51.** UV-vis spectra (250-725 nm) corresponding to the titration of diimide **6b** with L-Trp.

## 5. NMR titrations with tryptophan

### 5.1. Picric acid (1)

$^1\text{H}$  NMR titration between picric acid and L-tryptophan in  $\text{D}_2\text{O}$ . The shift of the proton of the receptor (H-3(5)) was followed.

| [Receptor 1]<br>(M) | [L-Trp]<br>(M) | [G]/[H] | chemical shift<br>( $\delta$ , ppm) |
|---------------------|----------------|---------|-------------------------------------|
| 0.0049              | 0.0000         | 0.00    | 8.7518                              |
| 0.0049              | 0.0016         | 0.33    | 8.7300                              |
| 0.0049              | 0.0031         | 0.63    | 8.7108                              |
| 0.0049              | 0.0044         | 0.90    | 8.6979                              |
| 0.0049              | 0.0057         | 1.16    | 8.6826                              |
| 0.0049              | 0.0069         | 1.41    | 8.6749                              |
| 0.0049              | 0.0090         | 1.84    | 8.6544                              |
| 0.0049              | 0.0109         | 2.22    | 8.6390                              |
| 0.0049              | 0.0126         | 2.57    | 8.6211                              |
| 0.0049              | 0.0172         | 3.51    | 8.5980                              |
| 0.0049              | 0.0196         | 4.00    | 8.5877                              |
| 0.0049              | 0.0217         | 4.43    | 8.5749                              |

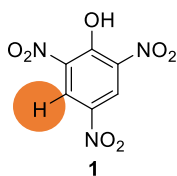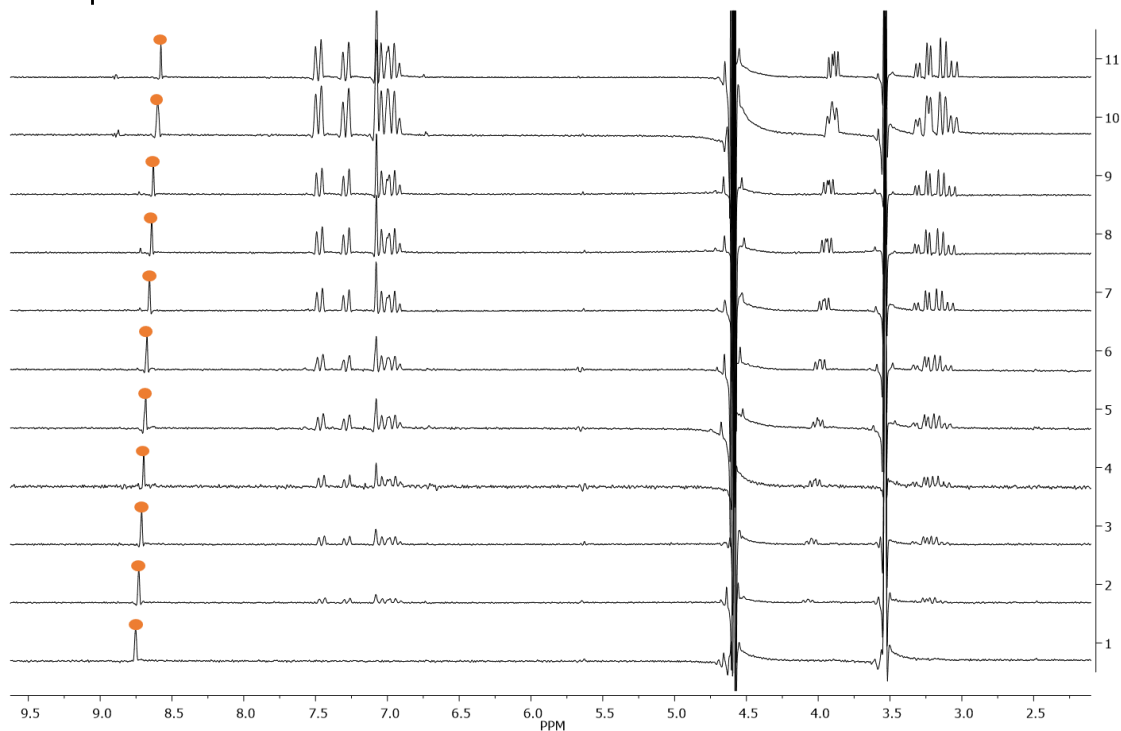

**Figure S52.**  $^1\text{H}$  NMR spectra (2.5-9.5 ppm) corresponding to titration of picric acid (1) and L-Trp.

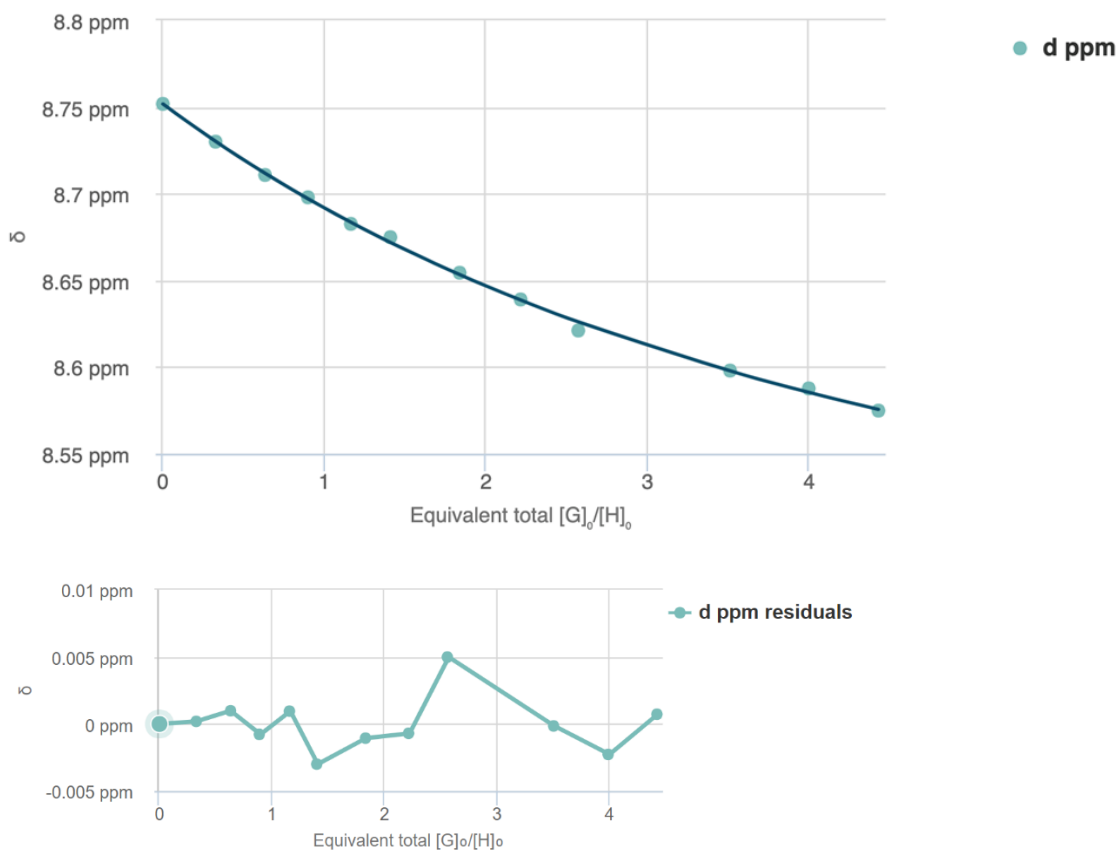

**Figure S53.** Binding isotherm corresponding to titration of picric acid (**1**) and L-Trp (*supramolecular.org*).

|                                      |
|--------------------------------------|
| NMR 1:1                              |
| $K_d=47.7(\pm 2.4\%) \text{ M}^{-1}$ |
| Covariance=1.1982e-3                 |

<http://app.supramolecular.org/bindfit/view/5782103f-30e4-4c3d-aa88-abb087367b6>

## 5.2. Sodium 2,4,6-trinitrobenzenesulfonate (**3b**)

$^1\text{H}$  NMR titration between sodium 2,4,6-trinitrobenzenesulfonate and L-tryptophan in  $\text{D}_2\text{O}$ . The shift of the H-13 proton of the L-Trp was followed.

| [L-Trp] (M) | [Sodium 2,4,6-trinitrobenzenesulfonate] (M) | [G]/[H] | chemical shift ( $\delta$ , ppm) |
|-------------|---------------------------------------------|---------|----------------------------------|
| 0.0049      | 0.0000                                      | 0.00    | 7.5319                           |
| 0.0049      | 0.0016                                      | 0.33    | 7.5242                           |
| 0.0049      | 0.0030                                      | 0.61    | 7.5216                           |
| 0.0049      | 0.0043                                      | 0.88    | 7.5170                           |
| 0.0049      | 0.0068                                      | 1.39    | 7.5098                           |
| 0.0049      | 0.0089                                      | 1.82    | 7.5037                           |
| 0.0049      | 0.0107                                      | 2.18    | 7.5011                           |
| 0.0049      | 0.0124                                      | 2.53    | 7.4960                           |
| 0.0049      | 0.0158                                      | 3.22    | 7.4909                           |
| 0.0049      | 0.0185                                      | 3.78    | 7.4883                           |
| 0.0049      | 0.0207                                      | 4.22    | 7.4857                           |

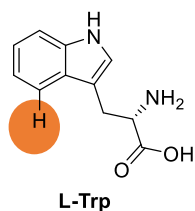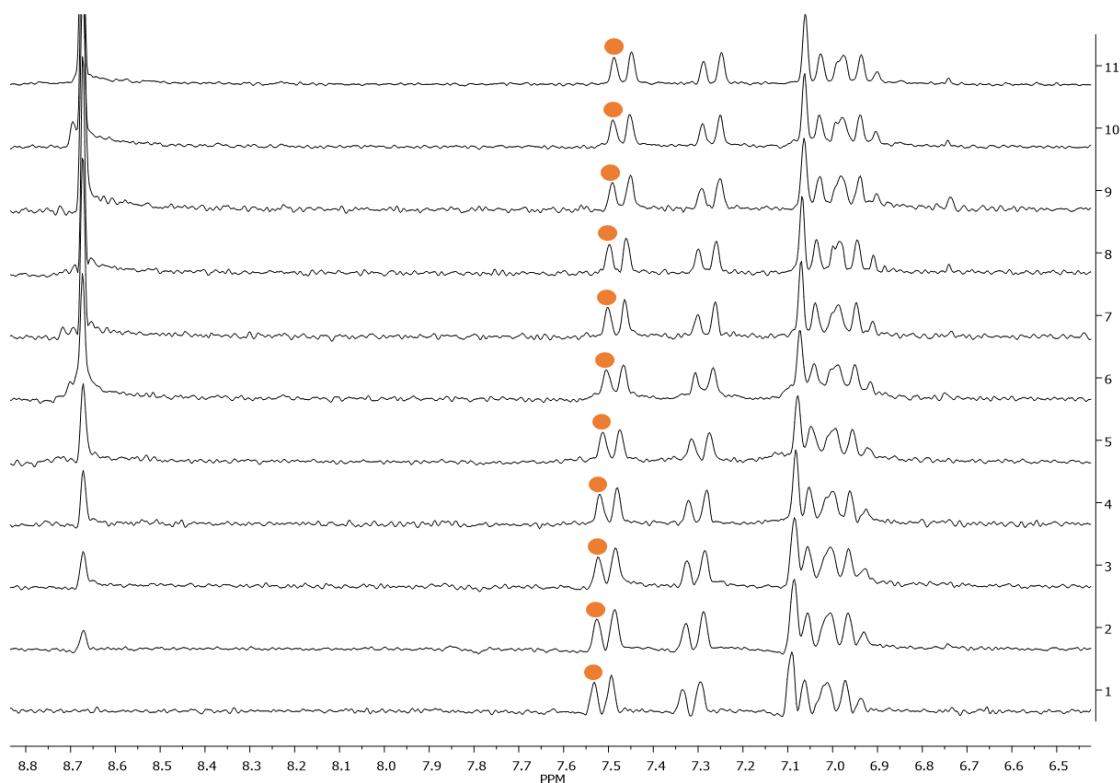

Figure S54.  $^1\text{H}$  NMR spectra (6.4-8.8 ppm) corresponding to titration of **3b** and L-Trp.

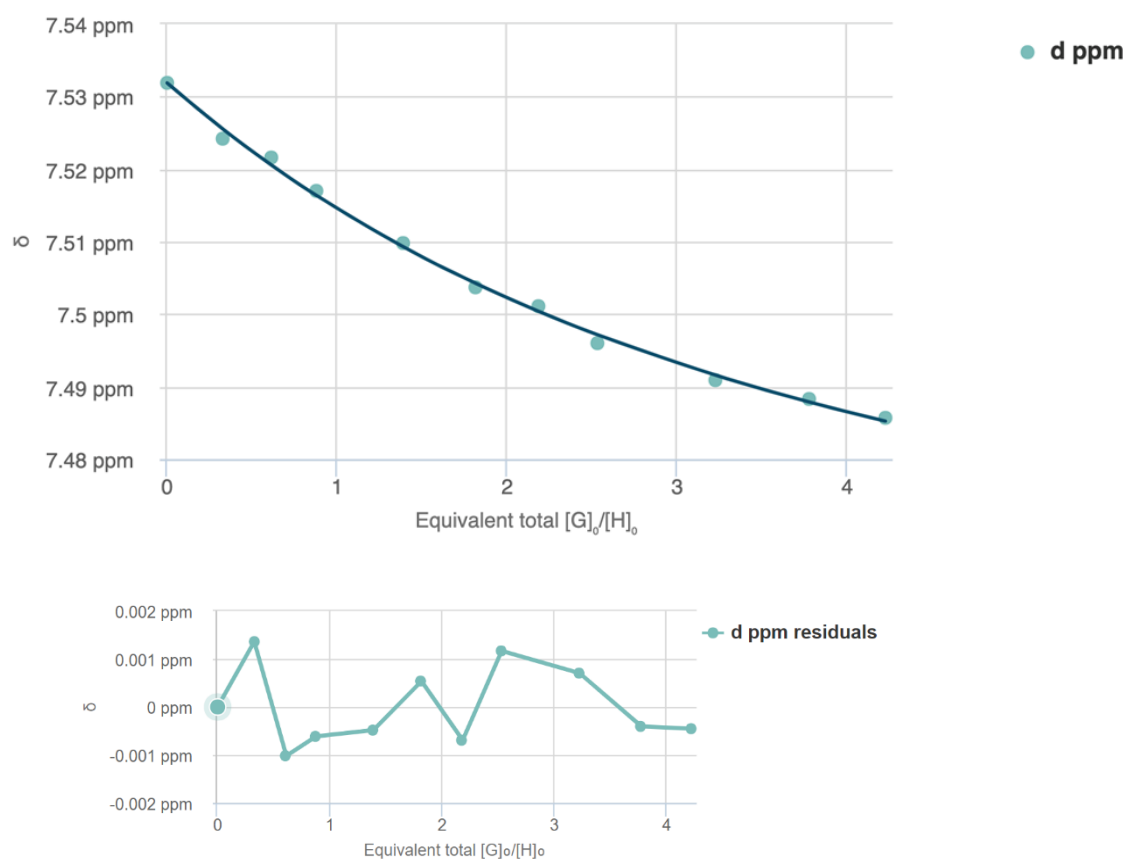

**Figure S55.** Binding isotherm corresponding to titration of *L*-Trp and sodium 2,4,6-trinitrobenzenesulfonate (**3b**) ([supramolecular.org](http://supramolecular.org)).

|                                      |
|--------------------------------------|
| NMR 1:1                              |
| $K_a = 62(\pm 3.9\%) \text{ M}^{-1}$ |
| Covariance = 2.6343e-3               |

<http://app.supramolecular.org/bindfit/view/b94c31e5-2975-4b65-8269-999959445314>

### 5.3. 3,5-dinitrobenzoic acid (4a)

$^1\text{H}$  NMR titration between 3,5-dinitrobenzoic acid and *L*-tryptophan was carried out in  $\text{D}_2\text{O}$ . The shift of the H-2 proton of the receptor was followed.

| [Receptor <b>4a</b> ]<br>(M) | [L-Trp]<br>(M) | [G]/[H] | chemical shift<br>( $\delta$ , ppm) |
|------------------------------|----------------|---------|-------------------------------------|
| 0.0052                       | 0.0000         | 0.00    | 8.8927                              |
| 0.0052                       | 0.0018         | 0.35    | 8.8671                              |
| 0.0052                       | 0.0034         | 0.65    | 8.8440                              |
| 0.0052                       | 0.0049         | 0.94    | 8.8184                              |
| 0.0052                       | 0.0063         | 1.21    | 8.7902                              |
| 0.0052                       | 0.0077         | 1.48    | 8.7723                              |
| 0.0052                       | 0.0100         | 1.92    | 8.7543                              |
| 0.0052                       | 0.0122         | 2.35    | 8.7364                              |
| 0.0052                       | 0.0141         | 2.71    | 8.7287                              |
| 0.0052                       | 0.0180         | 3.46    | 8.7005                              |

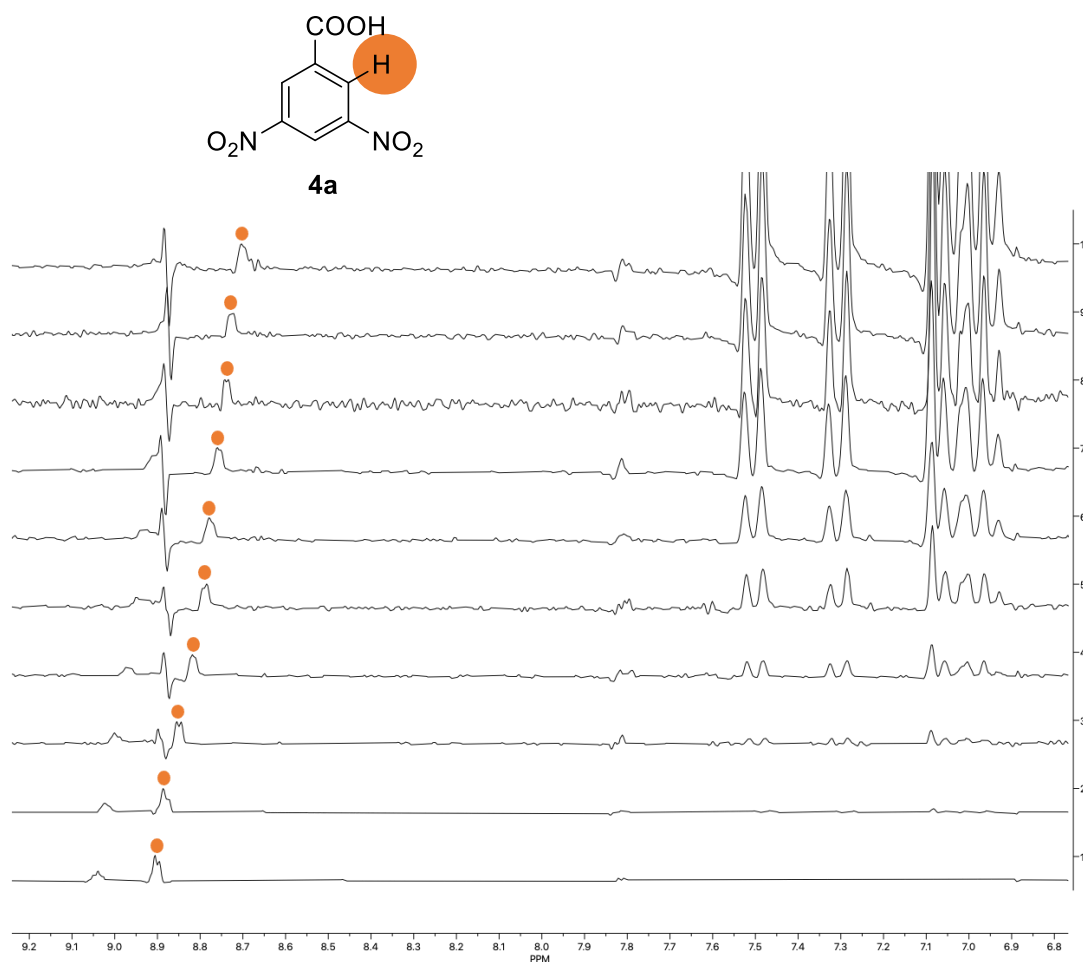

**Figure S56.**  $^1\text{H}$  NMR spectra (6.8-9.2 ppm) corresponding to titration of **4a** and *L*-Trp.

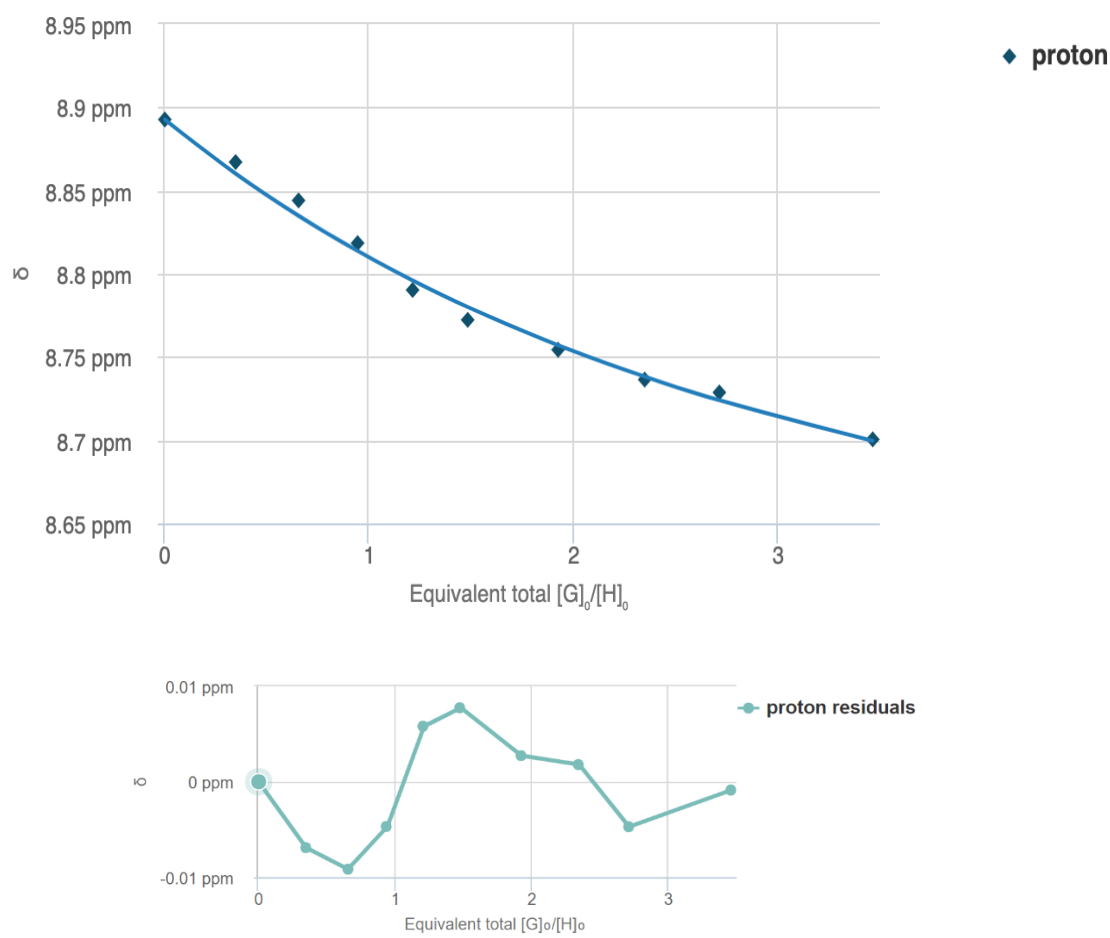

**Figure S57.** Binding isotherm corresponding to titration of 3,5-dinitrobenzoic acid (**4a**) and L-Trp (*supramolecular.org*).

|                                      |
|--------------------------------------|
| NMR 1:1                              |
| $K_a = 72(\pm 7.4\%) \text{ M}^{-1}$ |
| Covariance = 7.5124e-3               |

<http://app.supramolecular.org/bindfit/view/75dac39e-6317-46cd-86db-b244b288e852>

#### 5.4. Lithium 3,5-dinitrobenzoate (4b)

$^1\text{H}$  NMR titration between 3,5-dinitrobenzoate and *L*-tryptophan was carried out in  $\text{D}_2\text{O}$ . The shift of the H-2 proton of the receptor was followed.

| [Receptor 4b] (M) | [L-Trp] (M) | [G]/[H] | chemical shift ( $\delta$ , ppm) |
|-------------------|-------------|---------|----------------------------------|
| 0.0063            | 0.000       | 0.00    | 8.8466                           |
| 0.0063            | 0.0014      | 0.22    | 8.8338                           |
| 0.0063            | 0.0033      | 0.52    | 8.8235                           |
| 0.0063            | 0.0048      | 0.76    | 8.8105                           |
| 0.0063            | 0.0062      | 0.98    | 8.7928                           |
| 0.0063            | 0.0075      | 1.18    | 8.7800                           |
| 0.0063            | 0.0098      | 1.55    | 8.7646                           |
| 0.0063            | 0.0118      | 1.87    | 8.7543                           |
| 0.0063            | 0.0136      | 2.16    | 8.7418                           |
| 0.0063            | 0.0174      | 2.76    | 8.7236                           |
| 0.0063            | 0.0204      | 3.24    | 8.7056                           |

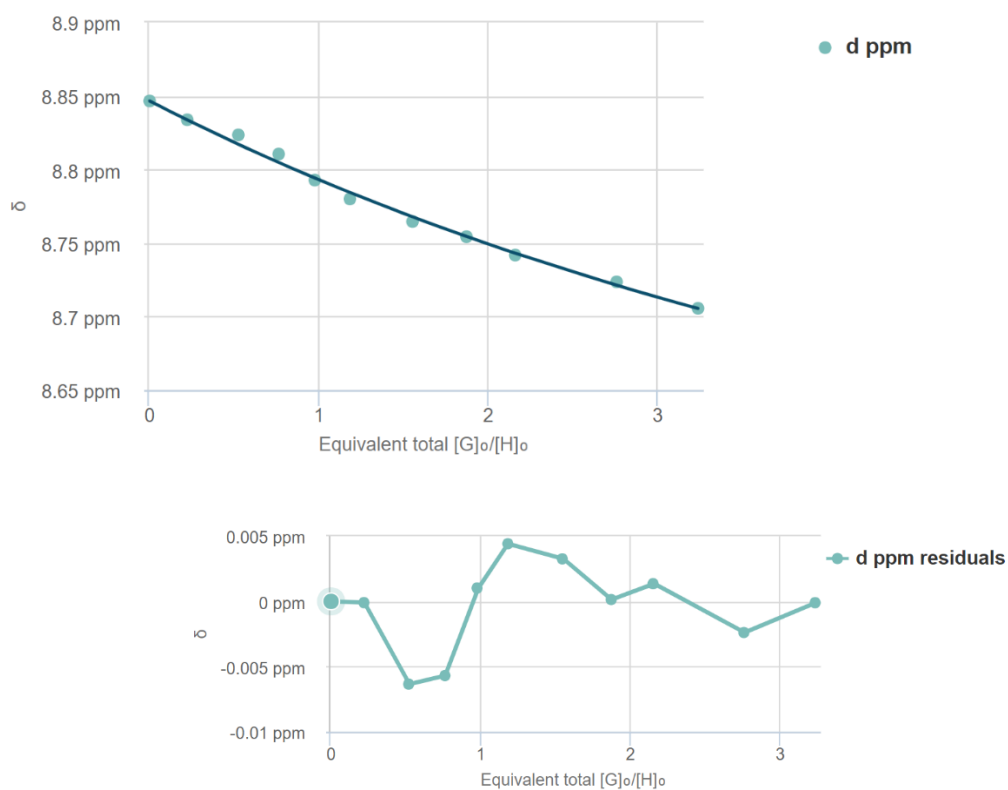

**Figure S58.** Binding isotherm corresponding to titration of 3,5-dinitrobenzoate (4b) and *L*-Trp (supramolecular.org).

|                                         |
|-----------------------------------------|
| NMR 1:1                                 |
| $K_a = 22.4 (\pm 4.4\%) \text{ M}^{-1}$ |
| Covariance = 5.1248e-3                  |

<http://app.supramolecular.org/bindfit/view/e8bd196c-a60b-4695-a1e1-4fc88deee2a8>



### 5.5. 2,4,6-trinitrobenzoic acid (**5a**)

The shift of the proton of 2,4,6-trinitrobenzoic acid in the  $^1\text{H}$  NMR titration with *L*-tryptophan in  $\text{D}_2\text{O}$  was evaluated.

*\*Warning: 2,4,6-trinitrobenzoic acid is a potentially explosive compound.*

| [Receptor <b>5a</b> ]<br>(M) | [ <i>L</i> -Trp]<br>(M) | [G]/[H] | chemical shift<br>( $\delta$ , ppm) |
|------------------------------|-------------------------|---------|-------------------------------------|
| 0.0049                       | 0.0000                  | 0.00    | 9.1131                              |
| 0.0049                       | 0.0030                  | 0.61    | 9.0952                              |
| 0.0049                       | 0.0043                  | 0.88    | 9.0875                              |
| 0.0049                       | 0.0056                  | 1.14    | 9.0834                              |
| 0.0049                       | 0.0078                  | 1.59    | 9.0772                              |
| 0.0049                       | 0.0098                  | 2.00    | 9.0670                              |
| 0.0049                       | 0.0115                  | 2.35    | 9.0619                              |
| 0.0049                       | 0.0138                  | 2.82    | 9.0567                              |
| 0.0049                       | 0.0157                  | 3.20    | 9.0516                              |
| 0.0049                       | 0.0184                  | 3.76    | 9.0491                              |
| 0.0049                       | 0.0205                  | 4.18    | 9.0465                              |

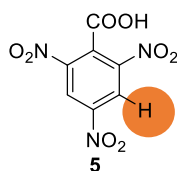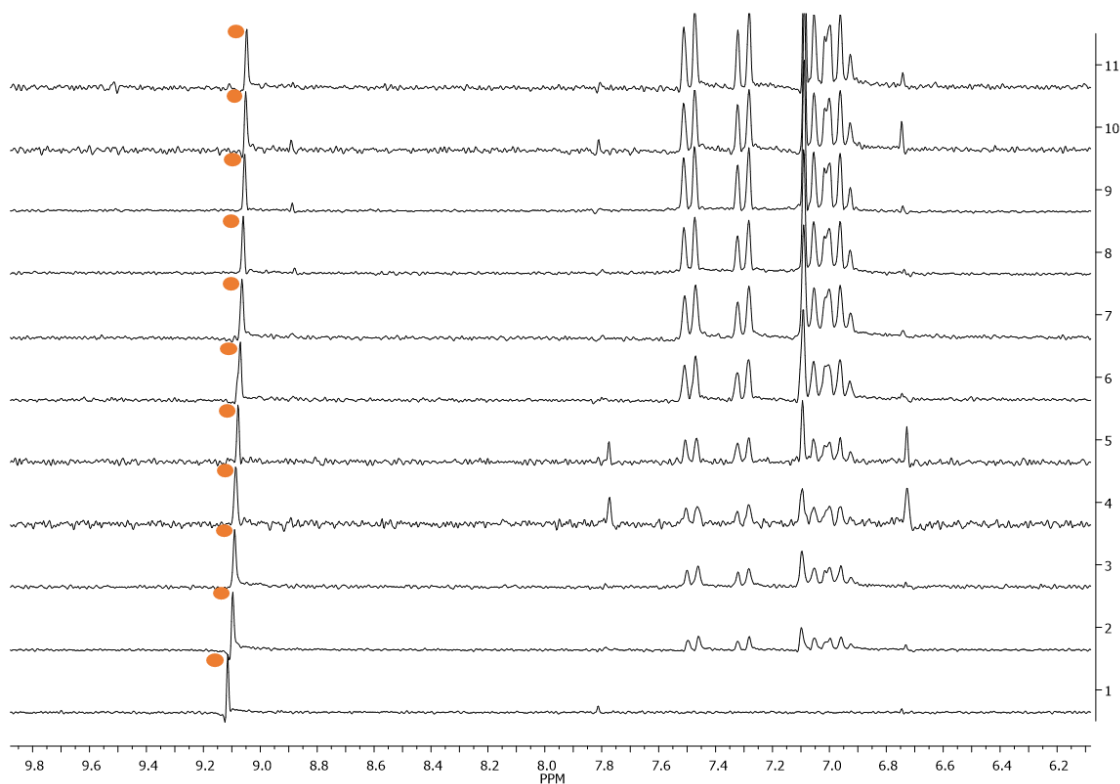

**Figure S59.**  $^1\text{H}$  NMR spectra (6.2-9.8 ppm) corresponding to titration of **5a** and *L*-Trp.

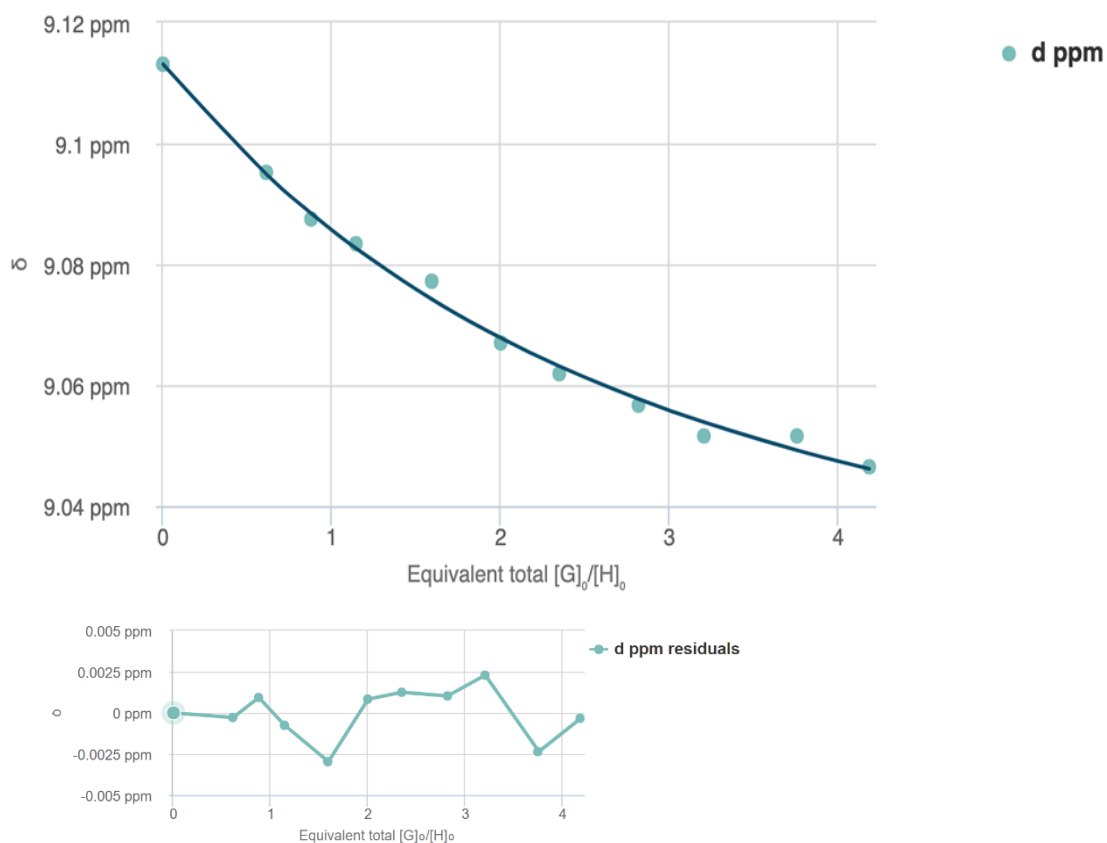

**Figure S60.** Binding isotherm corresponding to titration of 2,4,6-trinitrobenzoic acid (**5a**) and L-Trp (*supramolecular.org*).

NMR 1:1

$K_a = 92.7 (\pm 5.8\%) \text{ M}^{-1}$

Covariance = 5.4835e-3

<http://app.supramolecular.org/bindfit/view/69061afa-c4c4-4113-b879-b876979844c2>

### 5.6. Lithium 2,4,6-trinitrobenzoate (5b)

The shift of the proton of 2,4,6-trinitrobenzoate in the  $^1\text{H}$  NMR titration with *L*-tryptophan in  $\text{D}_2\text{O}$  was evaluated.

\*Warning: 2,4,6-trinitrobenzoic acid is a potentially explosive compound.

| [Receptor 5b] (M) | [L-Trp] (M) | [G]/[H] | chemical shift ( $\delta$ , ppm) |
|-------------------|-------------|---------|----------------------------------|
| 0.0063            | 0.0000      | 0.00    | 9.106                            |
| 0.0063            | 0.0018      | 0.29    | 9.1003                           |
| 0.0063            | 0.0034      | 0.54    | 9.0926                           |
| 0.0063            | 0.0049      | 0.78    | 9.0875                           |
| 0.0063            | 0.0063      | 1.00    | 9.0824                           |
| 0.0063            | 0.0077      | 1.22    | 9.0798                           |
| 0.0063            | 0.0101      | 1.60    | 9.0721                           |
| 0.0063            | 0.0122      | 1.94    | 9.0644                           |
| 0.0063            | 0.0141      | 2.24    | 9.0593                           |
| 0.0063            | 0.018       | 2.86    | 9.0465                           |

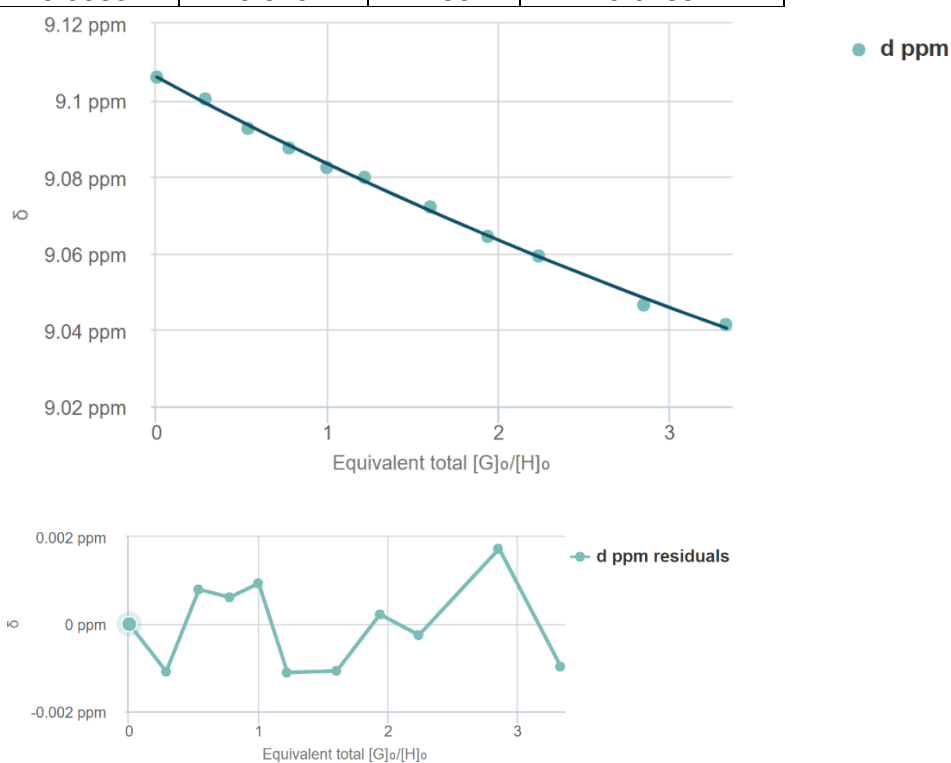

**Figure S61.** Binding isotherm corresponding to titration of 2,4,6-trinitrobenzoate (5b) and *L*-Trp (supramolecular.org).

|                                        |
|----------------------------------------|
| NMR 1:1                                |
| $K_a = 12.7(\pm 2.5\%) \text{ M}^{-1}$ |
| Covariance= 2.1310e-3                  |

<http://app.supramolecular.org/bindfit/view/92415c68-4dc7-442e-8aa6-ed59e8f4f4ca>

### 5.7. *N,N'*-bis(glyciny)pyromellitic diimide (**6b**)

The shift of the aromatic proton of the receptor **6b** was evaluated.

| [Receptor <b>6b</b> ]<br>(M) | [L-Trp]<br>(M) | [G]/[H] | chemical shift<br>( $\delta$ , ppm) |
|------------------------------|----------------|---------|-------------------------------------|
| 0.0054                       | 0.0000         | 0.00    | 8.1495                              |
| 0.0054                       | 0.0016         | 0.27    | 8.1188                              |
| 0.0054                       | 0.0032         | 0.59    | 8.0931                              |
| 0.0054                       | 0.0046         | 0.85    | 8.0701                              |
| 0.0054                       | 0.0059         | 1.09    | 8.0521                              |
| 0.0054                       | 0.0072         | 1.33    | 8.0316                              |
| 0.0054                       | 0.0094         | 1.74    | 8.0009                              |
| 0.0054                       | 0.0110         | 2.04    | 7.9753                              |
| 0.0054                       | 0.0131         | 2.43    | 7.9493                              |
| 0.0054                       | 0.0147         | 2.72    | 7.9317                              |
| 0.0054                       | 0.0180         | 3.33    | 7.9115                              |
| 0.0054                       | 0.0206         | 3.82    | 7.8932                              |

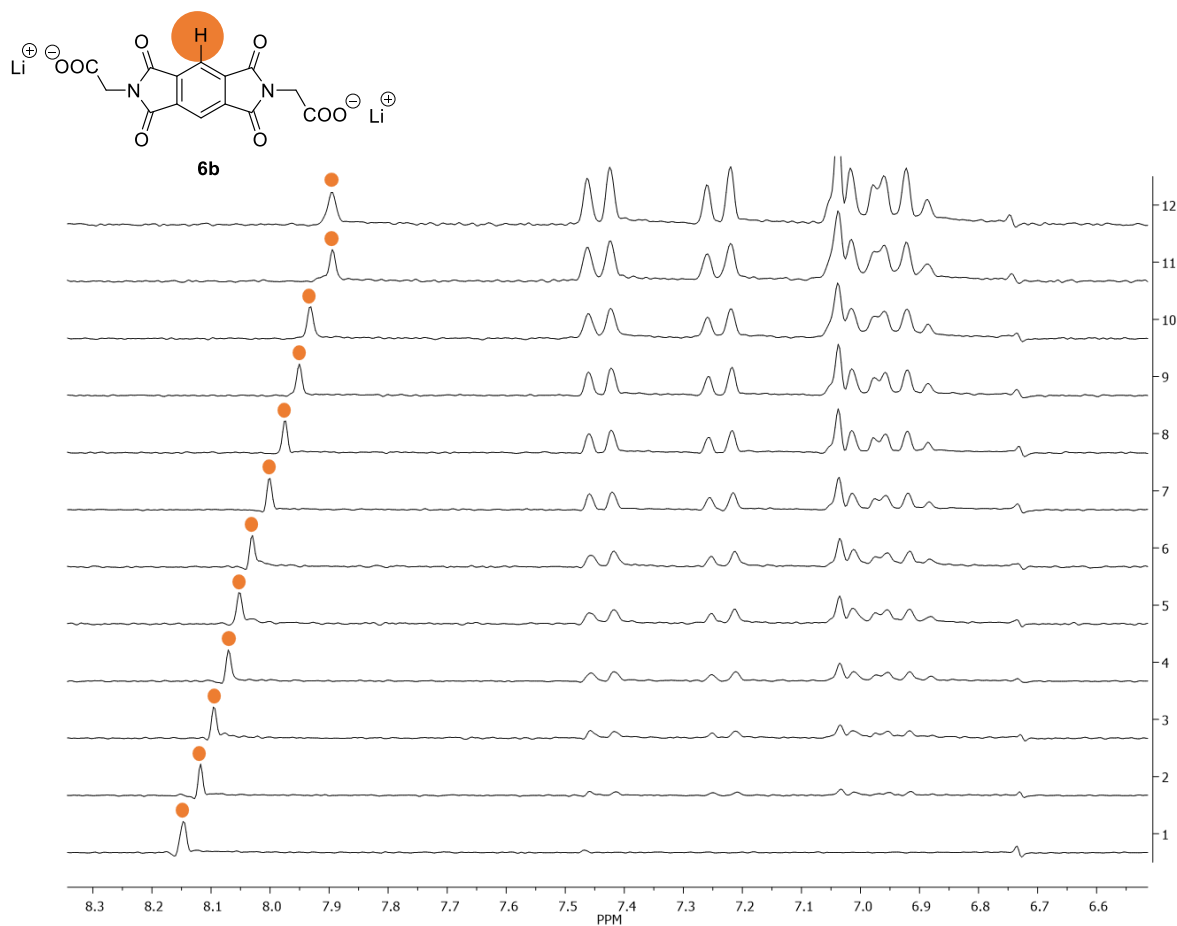

**Figure S62.** <sup>1</sup>H NMR spectra (6.5-8.3 ppm) corresponding to titration of **6b** and L-Trp.

### 1:1 Binding model (1 molecule diimide **6b** + 1 molecule Trp)

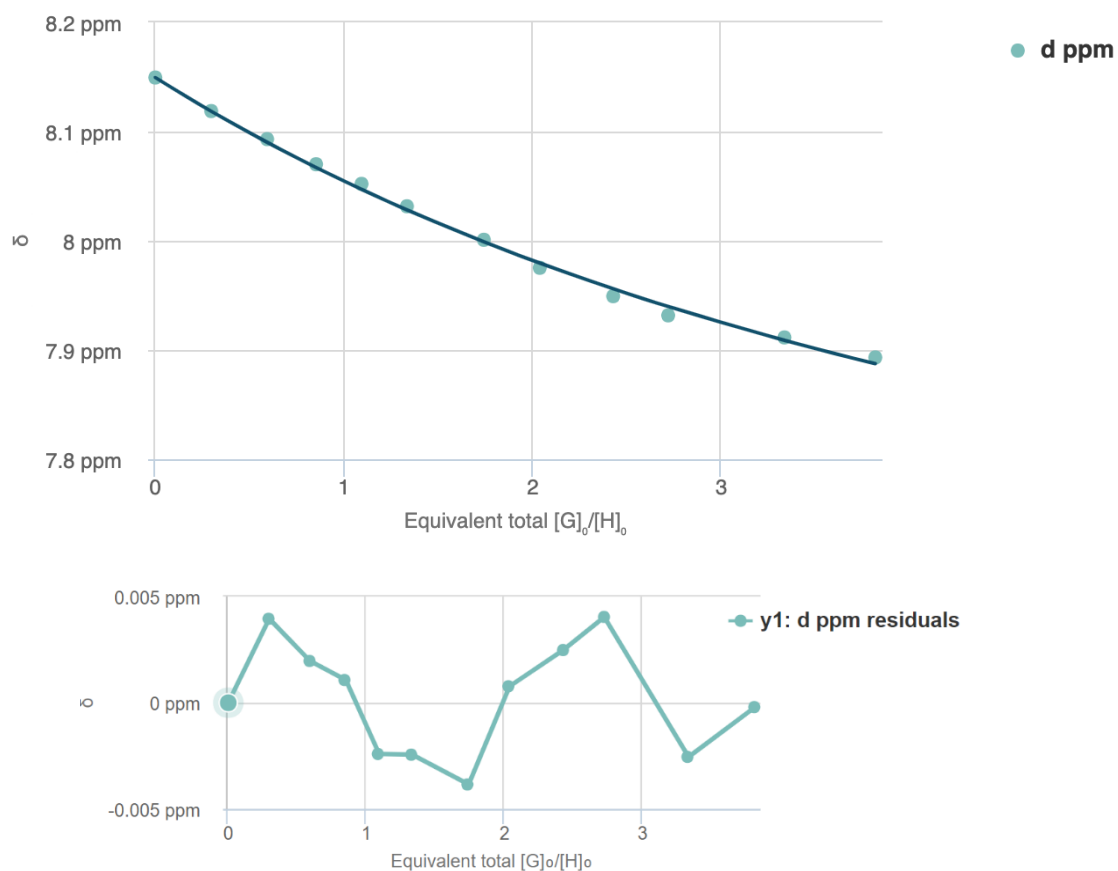

**Figure S63.** Binding isotherm corresponding to titration of receptor **6b** and L-Trp (*supramolecular.org*).

NMR 1:1

$K_a = 38 (\pm 3.3\%) \text{ M}^{-1}$

Covariance = 2.8205e-3

<http://app.supramolecular.org/bindfit/view/09640114-d841-4d40-aedb-b367890a45c0>

## Comparison of the different binding models (online web-applet BindFit[9])

Different binding models were considered:

- 1:1 Binding model (1 molecule diimide **6b** + 1 molecule Trp)
- 1:2 Binding model (1 molecule diimide **6b** + 2 molecules Trp)
- 2:1 Binding model (2 molecules diimide **6b** + 1 molecule Trp)

Association constants are shown in table S5. Models converging on negative values for the association constants have not been included.

**Table S5. Association constants for the binding of diimide 6b with Trp**

| Binding model       | $cov_{fit} (10^{-3})^a$ | $cov_{fit}$ factor | $K_1 (M^{-1})$         | $K_2 (M^{-1})$         |
|---------------------|-------------------------|--------------------|------------------------|------------------------|
| 1:1                 | 2.8205                  | 1                  | 38 ( $\pm 3.3\%$ )     |                        |
| Full 1:2            | 0.97299                 | 2.9                | 137.5 ( $\pm 22.3\%$ ) | 214.3 ( $\pm 25.9\%$ ) |
| Non cooperative 1:2 | 1.0134                  | 2.8                | 471.9 ( $\pm 4\%$ )    | 118 ( $\pm 4\%$ )      |
| Additive 1:2        | 0.97471                 | 2.9                | 188 ( $\pm 22.7\%$ )   | 179 ( $\pm 19.8\%$ )   |
| Non cooperative 2:1 | 1.5765                  | 1.8                | 128 ( $\pm 8.6\%$ )    | 32 ( $\pm 8.6\%$ )     |
| Statistical 2:1     | 2.9417                  | 0.9                | 30 ( $\pm 2.9\%$ )     | 7.5 ( $\pm 2.9\%$ )    |

<sup>a</sup> $cov_{fit}$  factor =  $cov_{fit}$  for the 1:1 model divided by the  $cov_{fit}$  for the binding model under study

Table S6 analyses chemical shifts of the diimide aromatic proton, in the free receptor (H) and in the complexes formed with tryptophan (HG<sub>2</sub> or H<sub>2</sub>G):

**Table S6. Chemical shifts for the binding of diimide 6b with Trp**

| Binding model       | $\delta_H$ | $\delta_{HG}$ | $\delta_{HG_2}$ | $\delta_{H_2G}$ |
|---------------------|------------|---------------|-----------------|-----------------|
| 1:1                 | 8.1495     | 7.5130        |                 |                 |
| Full 1:2            |            | 7.9485        | 7.8169          |                 |
| Non cooperative 1:2 |            | 8.0260        | 7.7730          |                 |
| Additive 1:2        |            | 7.9781        | 7.8066          |                 |
| Non cooperative 2:1 |            | 7.6664        |                 | 8.9210          |
| Statistical 2:1     |            | 7.4766        |                 | 6.8036          |

Models 2:1 are not considered due to the poor quality of fit or illogical chemical shifts. Three 1:2 models allow better fitting than the 1:1 model ( $cov_{fit}$  factor close to 3), with the non cooperative model showing lower errors in the estimation of association constants. The stoichiometry 1:2 also agrees with the one in crystal structure for diimide and Trp.

## 6. Binding to Tripeptide Trp-Gly-Trp (10)

### 6.1. UV-vis titration with diimide 6b

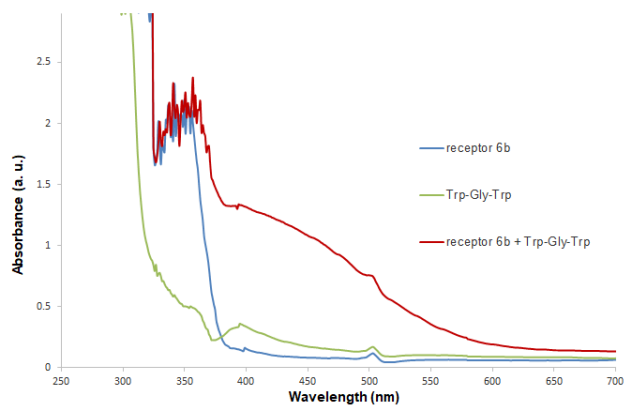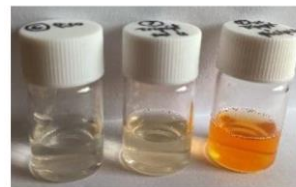

**6b** Trp-Gly-Trp complex

**Figure S64.** UV-Vis spectra (250-700 nm) of diimide **6b**, 0.01M, blue line), Trp-Gly-Trp (0.01M, green line) and the complex between diimide (**6b**) and tripeptide **10**.

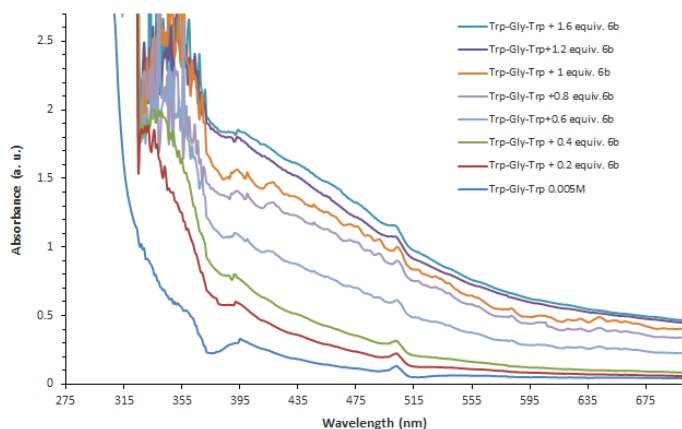

| [6b] mol/L | [10] mol/L | [10]/[6b] |
|------------|------------|-----------|
| 0.005      | 0.000      | 0.0       |
| 0.005      | 0.001      | 0.2       |
| 0.005      | 0.002      | 0.4       |
| 0.005      | 0.003      | 0.6       |
| 0.005      | 0.004      | 0.8       |
| 0.005      | 0.005      | 1.0       |
| 0.005      | 0.006      | 1.2       |
| 0.005      | 0.008      | 1.6       |

**Figure S65.** UV-vis spectra (275-700 nm) corresponding to the titration of diimide **6b** with tripeptide **10**.

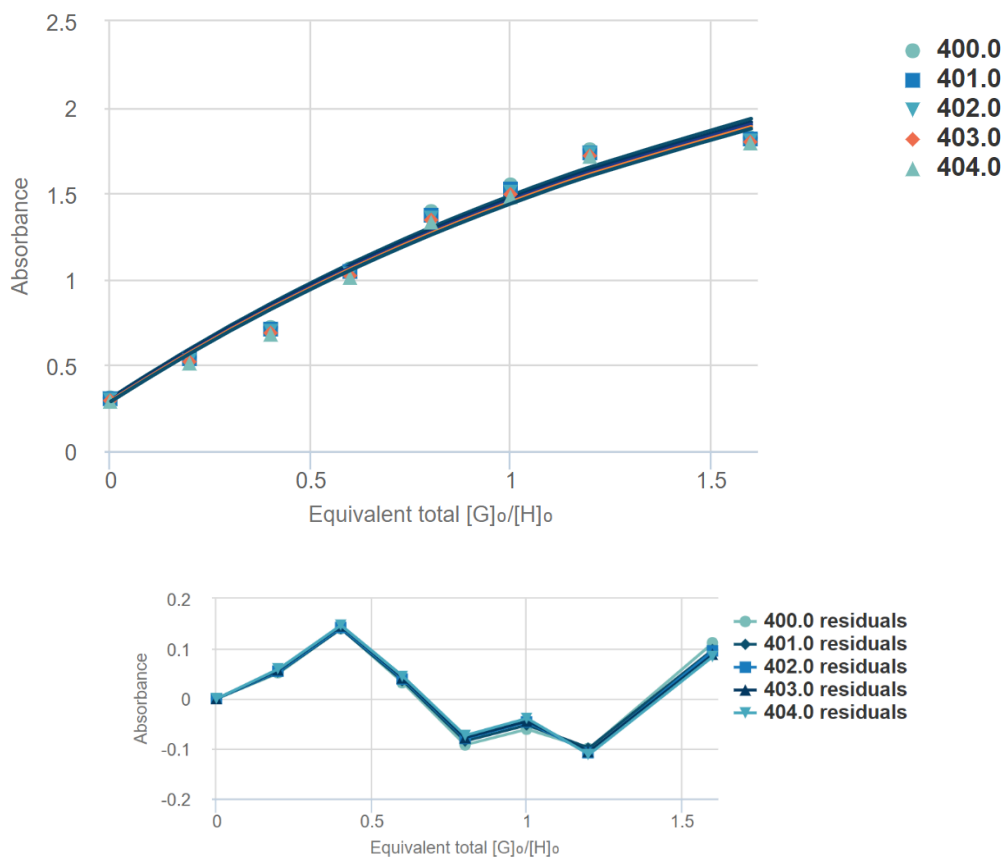

**Figure S66.** Binding isotherm for the 1:1 receptor **6b**:Trp-Gly-Trp (**10**) binding and the residual error obtained from fitting using Bindfit.

UV 1:1 ( $\lambda = 400\text{-}410\text{ nm}$ )

$K_a = 156 (\pm 4.1\%) \text{ M}^{-1}$

Covariance =  $2.3573\text{e-}2$

<http://app.supramolecular.org/bindfit/view/0b368567-2bf6-4d12-91c2-cc2f1311d2ba>



## 6.2. NMR titration in D<sub>2</sub>O with diimide **6b**

The shift of the aromatic proton of the receptor **6b** was evaluated in D<sub>2</sub>O.

| [Receptor <b>6b</b> ]<br>(M) | [Trp-Gly-Trp]<br>(M) | [G]/[H] | chemical shift<br>( $\delta$ , ppm) |
|------------------------------|----------------------|---------|-------------------------------------|
| 0.0048                       | 0.0000               | 0.00    | 8.1469                              |
| 0.0048                       | 0.0011               | 0.23    | 8.1162                              |
| 0.0048                       | 0.0021               | 0.44    | 8.0854                              |
| 0.0048                       | 0.0030               | 0.63    | 8.0598                              |
| 0.0048                       | 0.0039               | 0.81    | 8.0414                              |
| 0.0048                       | 0.0054               | 1.13    | 8.0085                              |
| 0.0048                       | 0.0068               | 1.42    | 7.9804                              |
| 0.0048                       | 0.0080               | 1.67    | 7.9624                              |
| 0.0048                       | 0.0090               | 1.88    | 7.9445                              |
| 0.0048                       | 0.0120               | 2.50    | 7.9137                              |
| 0.0048                       | 0.0150               | 3.13    | 7.8855                              |

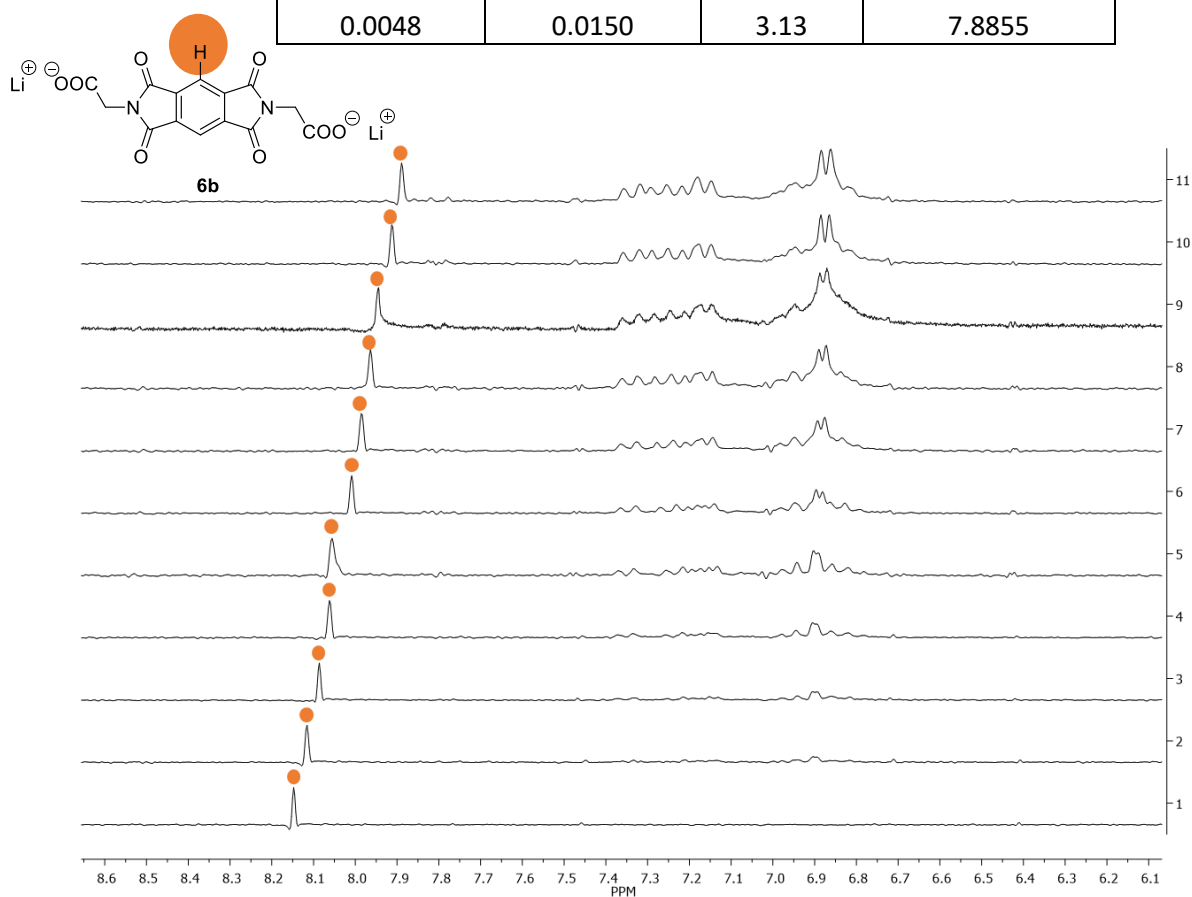

**Figure S67.** <sup>1</sup>H NMR spectra (6.1-8.6 ppm) corresponding to titration of **6b** and Trp-Gly-Trp (**10**).

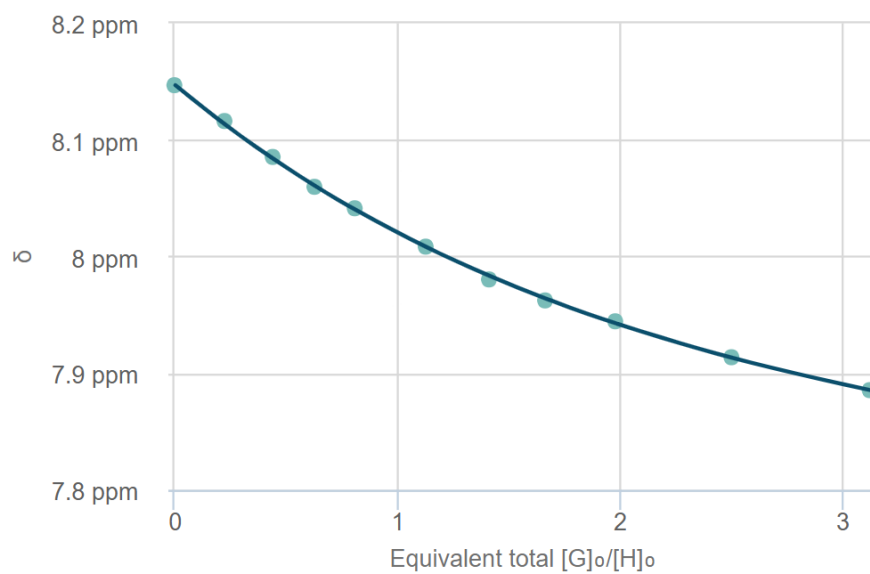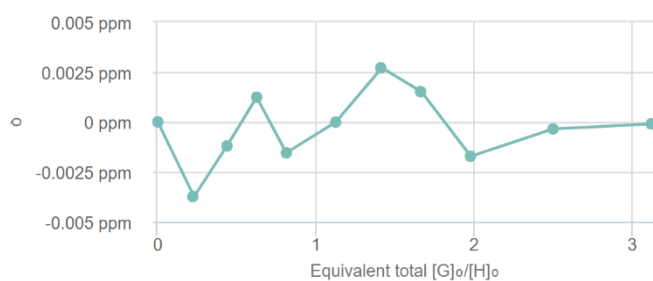

**Figure S68.** Binding isotherm for the 1:1 receptor **6b**:Trp-Gly-Trp binding and the residual error obtained from fitting using Bindfit.

|                                                          |
|----------------------------------------------------------|
| NMR 1:1                                                  |
| <b><math>K_d=112.3 (\pm 1.9\%) \text{ M}^{-1}</math></b> |
| Covariance=4.3630e-4                                     |

<http://app.supramolecular.org/bindfit/view/5888ba20-4d52-4054-8fbf-f584df512711>

## Comparison of the different binding models (online web-applet BindFit[9])

Different binding models were considered:

- 1:1 Binding model (1 molecule diimide **6b** + 1 molecule tripeptide **10**)
- 1:2 Binding model (1 molecule diimide **6b** + 2 molecule tripeptide **10**)
- 2:1 Binding model (2 molecules diimide **6b** + 1 molecule tripeptide **10**)

Association constants are shown in table S7. Models converging on negative values (or not converging) for the association constants have not been included.

**Table S7. Association constants for the binding of diimide 6b with tripeptide 10**

| <i>Binding model</i> | $cov_{fit} (10^{-4})^a$ | $cov_{fit}$<br><i>factor</i> | $K_1 (M^{-1})$        | $K_2 (M^{-1})$        |
|----------------------|-------------------------|------------------------------|-----------------------|-----------------------|
| 1:1                  | 4.3630                  | 1                            | 112.3 ( $\pm 1.9\%$ ) |                       |
| Full 1:2             | 2.6375                  | 1.6                          | 1662 ( $\pm 15\%$ )   | 48 ( $\pm 5.7\%$ )    |
| Non cooperative 1:2  | 4.2224                  | 1.0                          | 82 ( $\pm 1.9\%$ )    | 20.5 ( $\pm 1.9\%$ )  |
| Additive 1:2         | 3.4458                  | 1.2                          | 484.6 ( $\pm 8.4\%$ ) | 63 ( $\pm 10.3\%$ )   |
| Statistical 1:2      | 14.816                  | 0.3                          | 826 ( $\pm 7.2\%$ )   | 206.5 ( $\pm 7.2\%$ ) |
| Non cooperative 2:1  | 3.2135                  | 1.3                          | 190 ( $\pm 3\%$ )     | 47.5 ( $\pm 3\%$ )    |
| Statistical 2:1      | 5.8675                  | 0.7                          | 70 ( $\pm 1.5\%$ )    | 17.5 ( $\pm 1.5\%$ )  |

<sup>a</sup> $cov_{fit}$  factor =  $cov_{fit}$  for the 1:1 model divided by the  $cov_{fit}$  for the binding model under study

Table S8 analyses chemical shifts of the diimide aromatic proton, in the free receptor (H) and in the formed complexes with tripeptide (HG<sub>2</sub> or H<sub>2</sub>G):

**Table S8. Chemical shifts for the binding of diimide 6b with tripeptide 10**

| <i>Binding model</i> | $\delta_H$ | $\delta_{HG}$ | $\delta_{HG_2}$ | $\delta_{H_2G}$ |
|----------------------|------------|---------------|-----------------|-----------------|
| 1:1                  | 8.1469     | 7.6949        |                 |                 |
| Full 1:2             |            | 7.9845        | 7.6181          |                 |
| Non cooperative 1:2  |            | 7.5919        | 7.9926          |                 |
| Additive 1:2         |            | 7.9295        | 7.7122          |                 |
| Statistical 1:2      |            | 7.9754        | 7.8038          |                 |
| Non cooperative 2:1  |            | 7.7089        |                 | 8.3586          |
| Statistical 2:1      |            | 7.6517        |                 | 7.1566          |

Binding models 2:1 are not considered, either nonsense chemical shifts or bad quality of fitting. Among all the 1:2 binding models, full model 1:2 shows the better  $cov_{fit}$  factor,  $cov_{fit}$  factor = 1.6. But as more parameters are involved in fitting, when comparing binding 1:2 to 1:1, the quality of fitting should be significantly improved, which means  $cov_{fit}$  factor >3. This is not the case.

## Job plot analysis

Job plot experiments were carried out to get more information about the stoichiometry of the complex formed between receptor **6b** and Trp-Gly-Trp (**10**).

| $X_{\text{Receptor 6b}}$ | [Receptor <b>6b</b> ] | [Trp-Gly-Trp, <b>10</b> ] | chemical shift ( $\delta$ , ppm) | $\Delta\delta$ | $\Delta\delta$ [Receptor <b>6b</b> ] |
|--------------------------|-----------------------|---------------------------|----------------------------------|----------------|--------------------------------------|
| 1.0                      | 0.0048                | 0.0000                    | 8.3289                           | 0.0000         | 0.000000                             |
| 0.9                      | 0.0043                | 0.0005                    | 8.3084                           | 0.0205         | 0.000089                             |
| 0.8                      | 0.0038                | 0.0011                    | 8.2725                           | 0.0564         | 0.000217                             |
| 0.7                      | 0.0034                | 0.0016                    | 8.2264                           | 0.1025         | 0.000344                             |
| 0.6                      | 0.0029                | 0.0021                    | 8.1802                           | 0.1487         | 0.000428                             |
| 0.5                      | 0.0024                | 0.0027                    | 8.1290                           | 0.1999         | 0.000480                             |
| 0.4                      | 0.0019                | 0.0032                    | 8.0983                           | 0.2306         | 0.000443                             |
| 0.3                      | 0.0014                | 0.0037                    | 8.0880                           | 0.2409         | 0.000347                             |
| 0.2                      | 0.0010                | 0.0042                    | 8.0957                           | 0.2332         | 0.000224                             |
| 0.1                      | 0.0005                | 0.0048                    | 8.1008                           | 0.2281         | 0.000109                             |

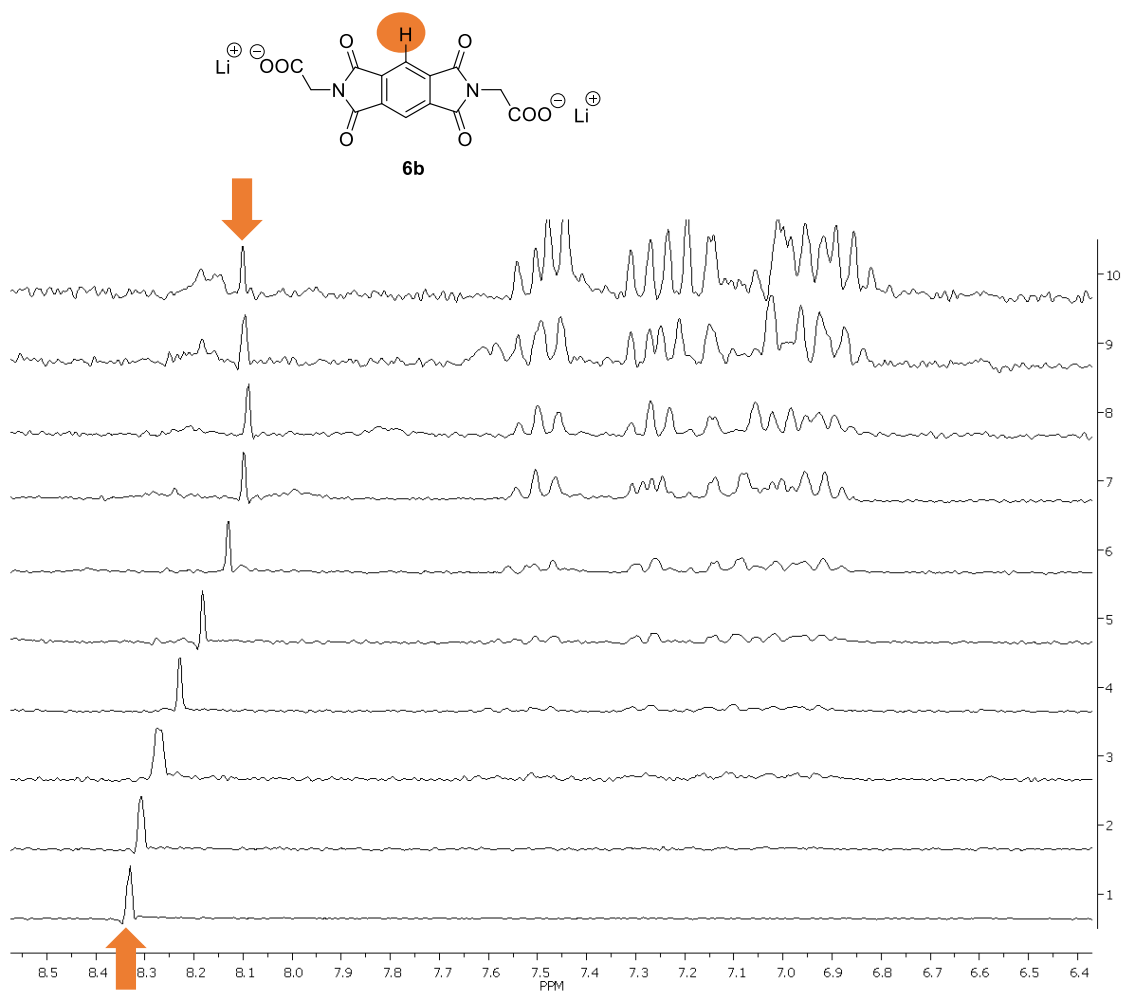

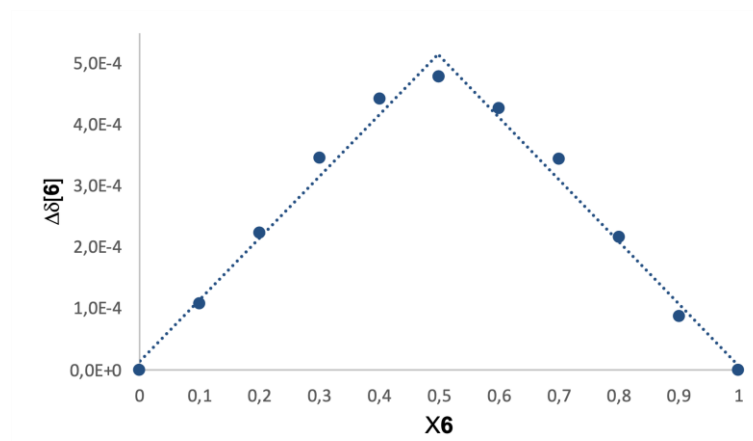

**Figure S69.** Job plot showing a 1:1 binding stoichiometry for a  $(\mathbf{6b})_1(\text{Trp-Gly-Trp})_1$  complex.

### Dilution experiments

Dilution experiments with decreasing concentrations of Trp-Gly-Trp (**10**) in D<sub>2</sub>O were carried out proving Trp-Gly-Trp fragments self-association does not exist in the concentration range for titrations.

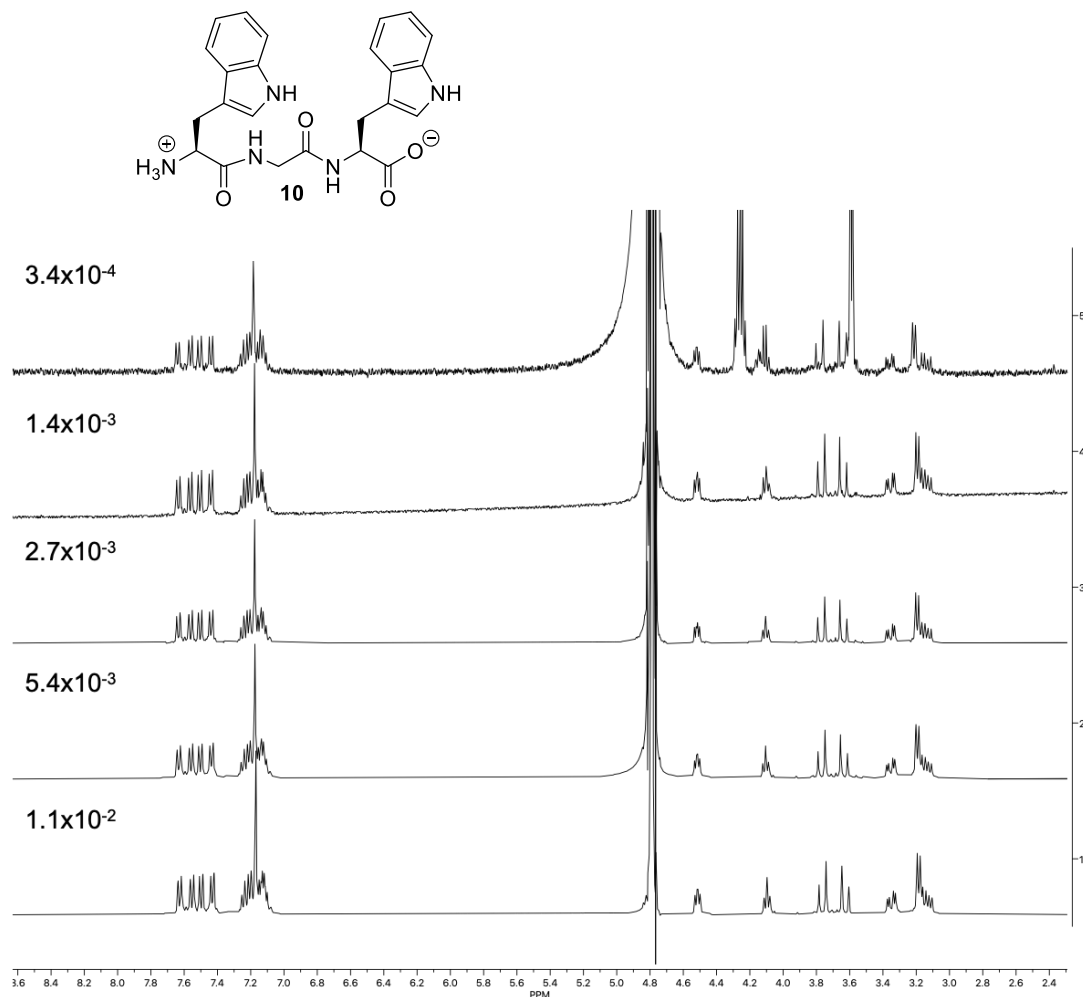

**Figure S70.** <sup>1</sup>H NMR spectra of Trp-Gly-Trp (**10**) in D<sub>2</sub>O at different concentrations.

### 6.3. 2D NMR studies of the complexes (6b:10) formed in D<sub>2</sub>O

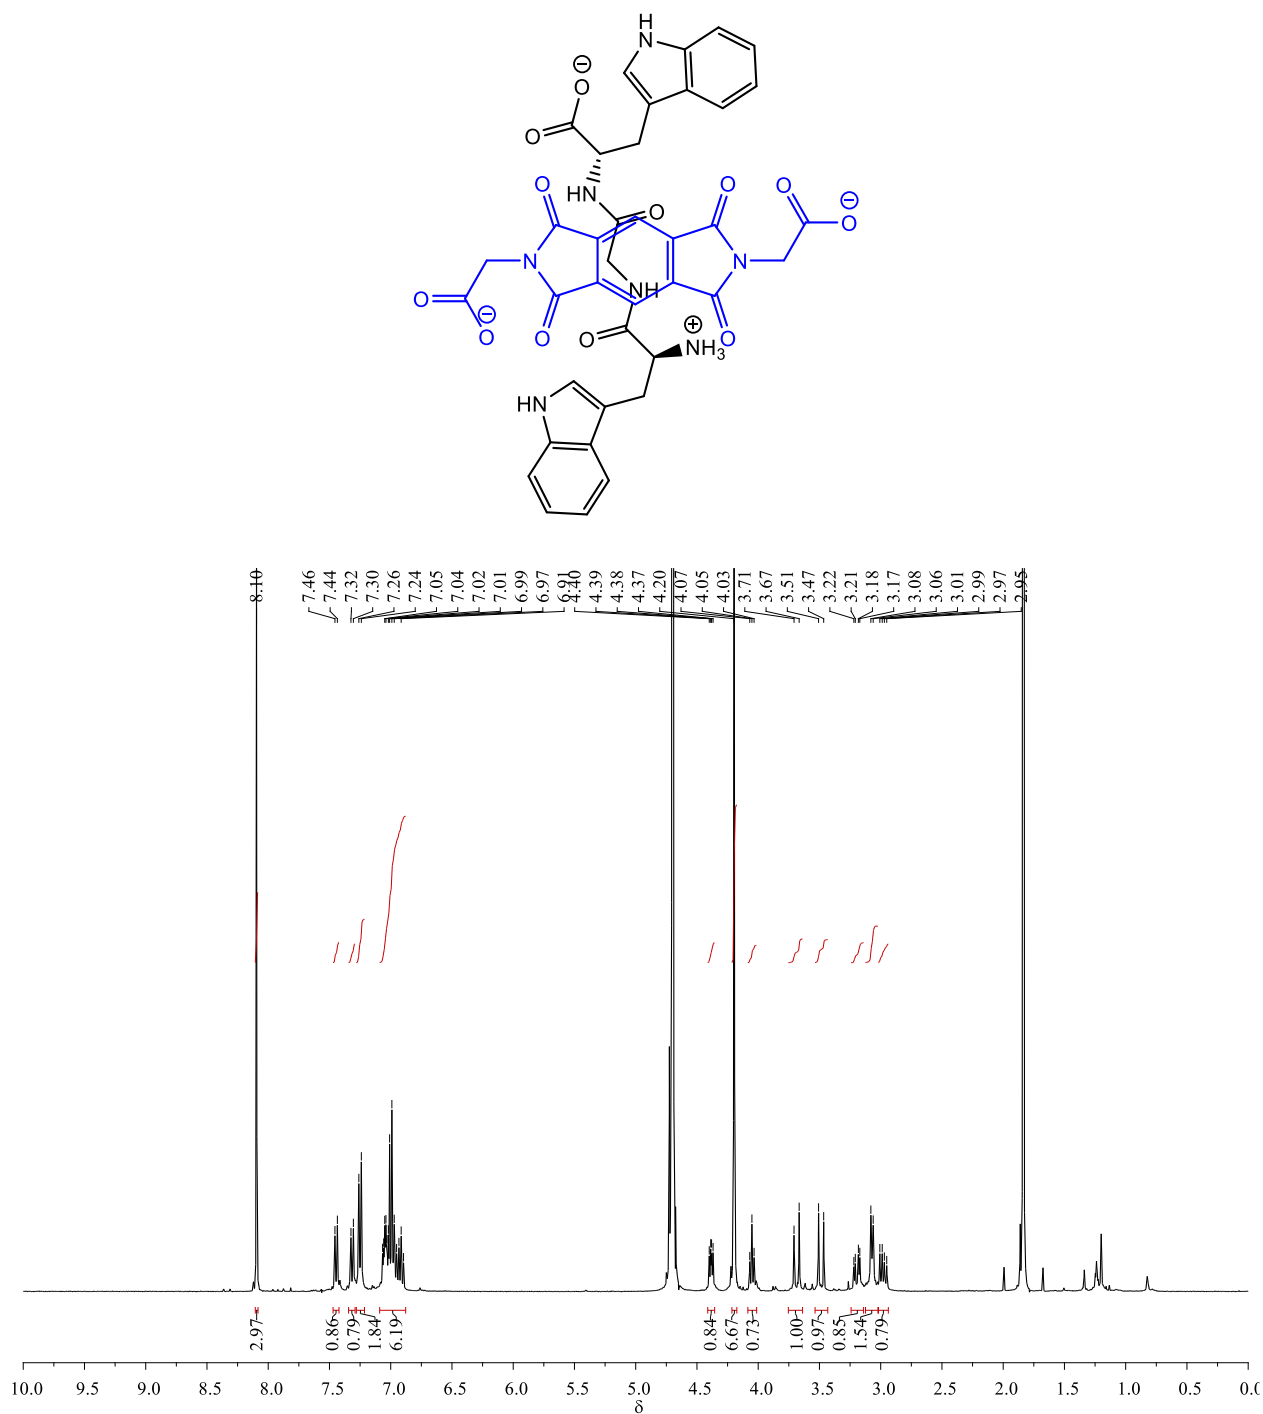

**Figure S71.** <sup>1</sup>H NMR spectrum of associate between receptor **6b** and Trp-Gly-Trp **10** in D<sub>2</sub>O.

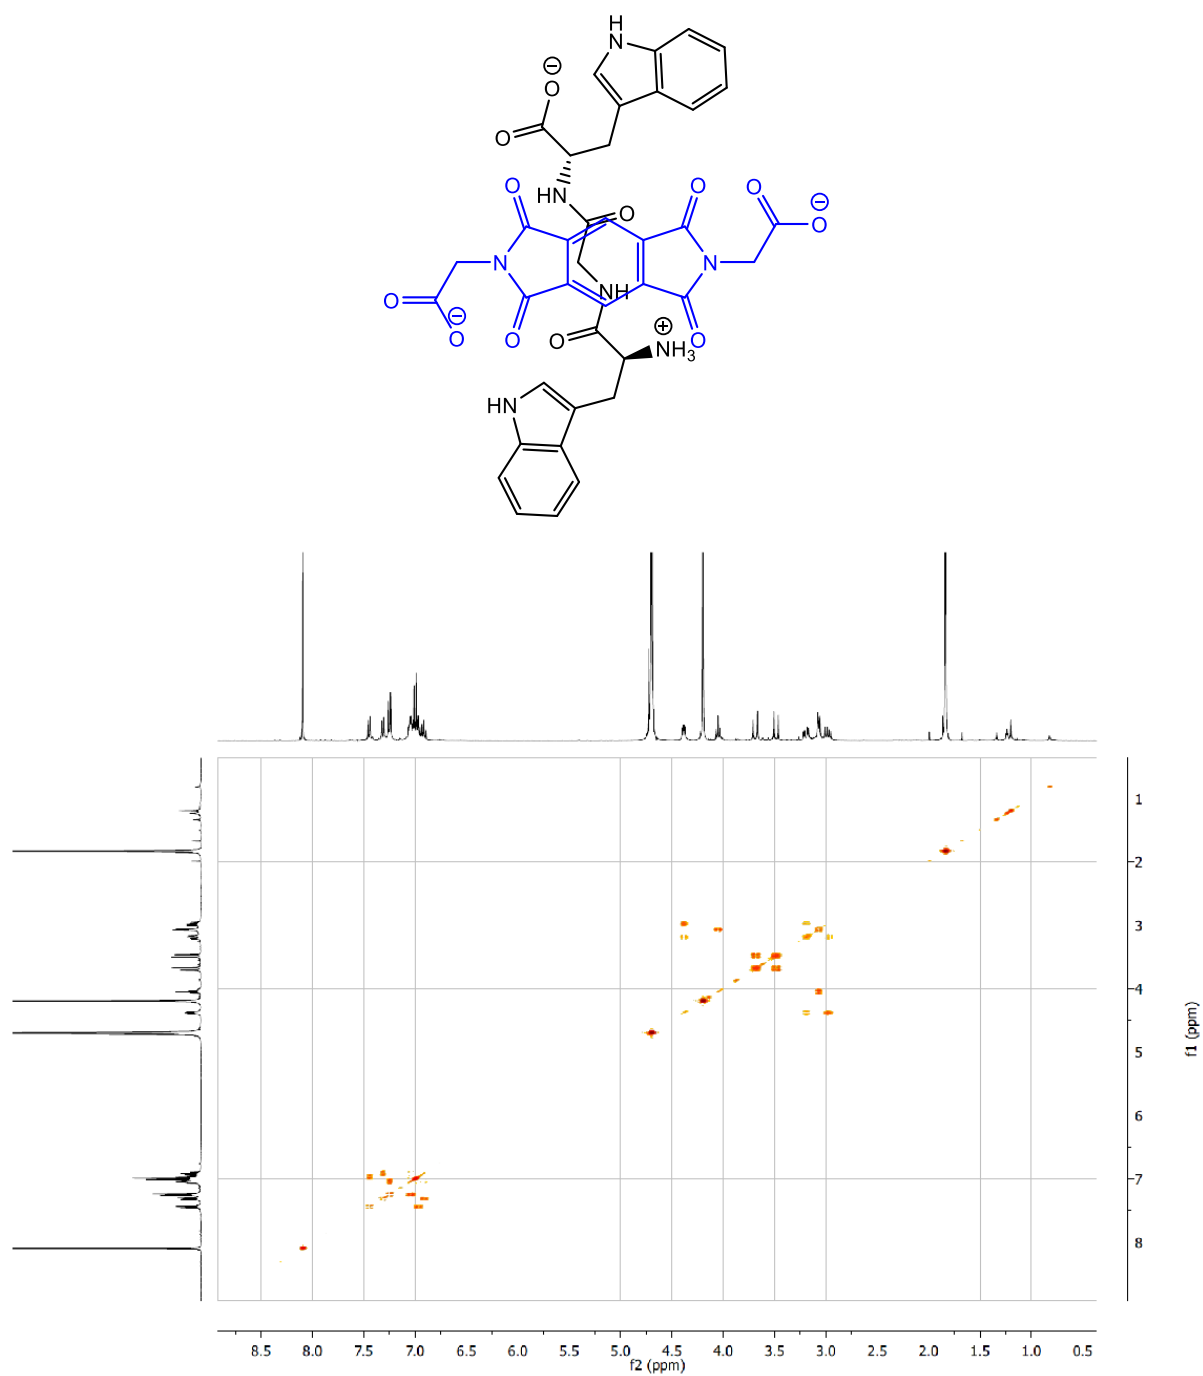

**Figure S72.** COSY spectrum of associate between receptor **6b** and Trp-Gly-Trp **10** in  $\text{D}_2\text{O}$ .



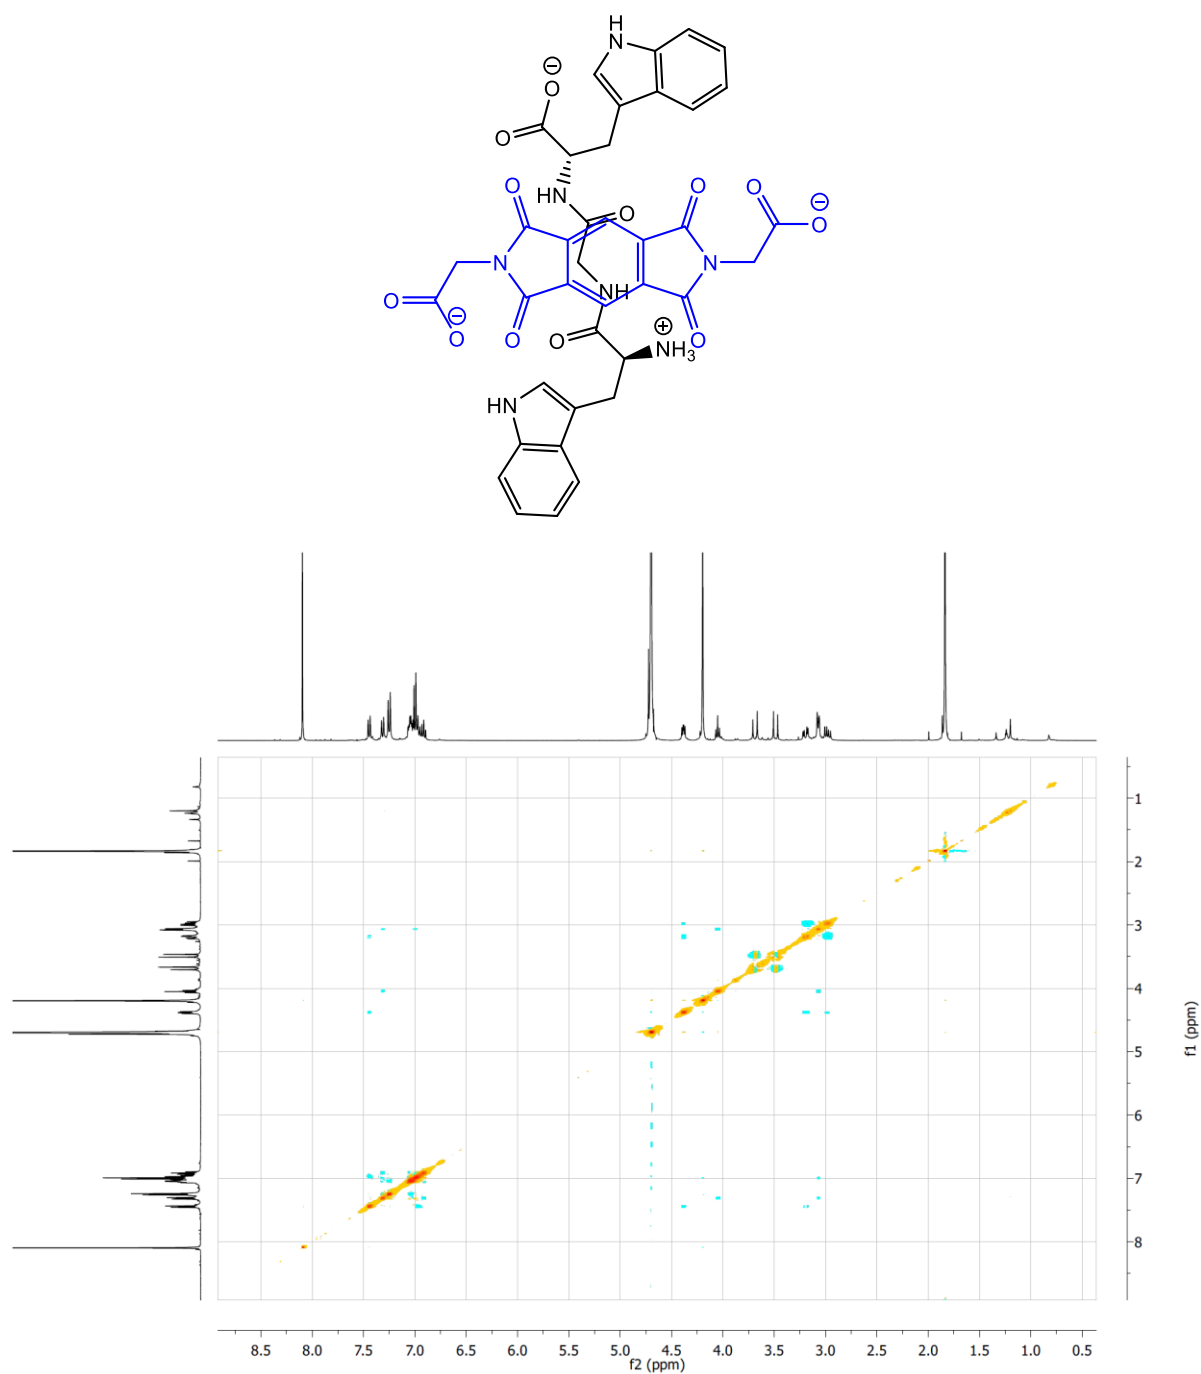

**Figure S73.** ROESY spectrum of associate between receptor **6b** and Trp-Gly-Trp **10** in  $D_2O$ .

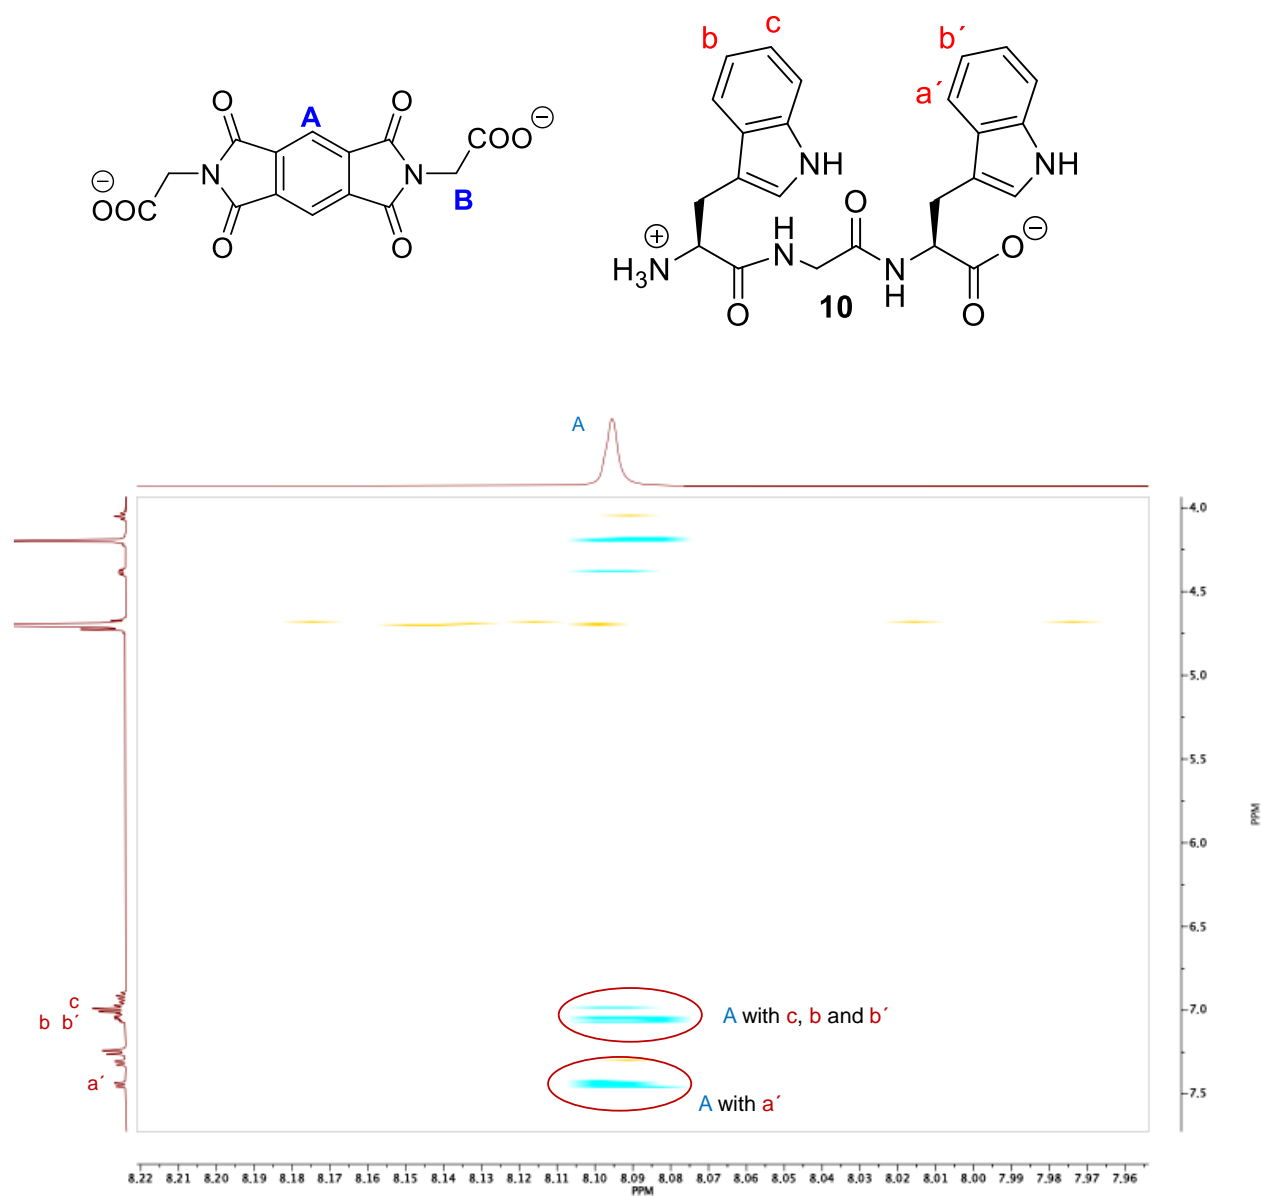

**Figure S74.** ROESY spectrum (aromatic region) of associate between receptor **6b** and Trp-Gly-Trp **10** in  $D_2O$ .

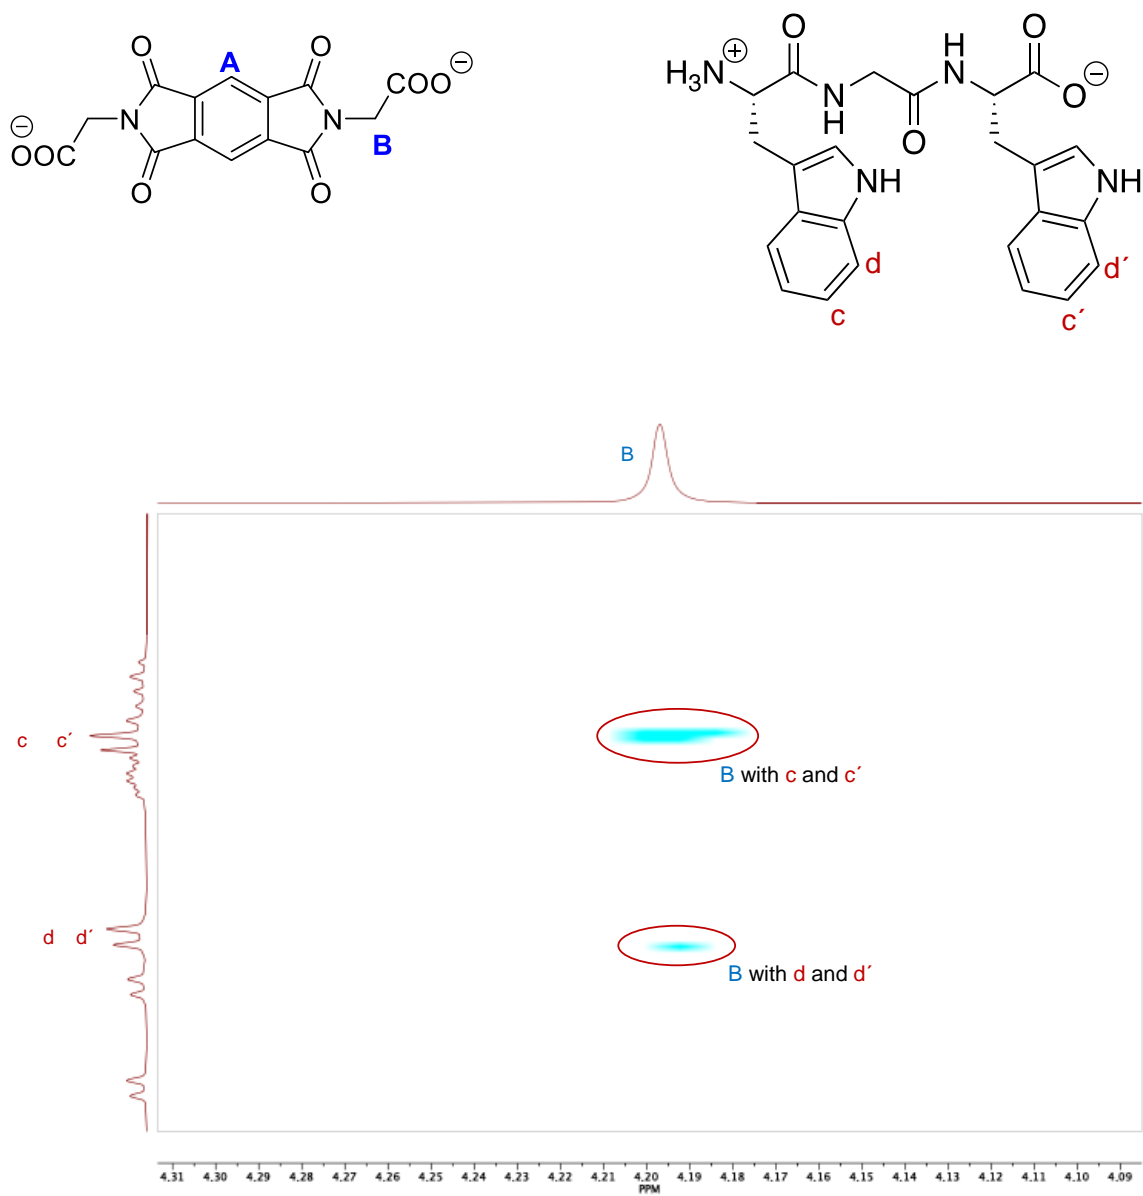

**Figure S75.** ROESY spectrum (4.10-4.30 ppm) of associate between receptor **6b** and Trp-Gly-Trp **10** in  $D_2O$ .

#### 6.4. NMR titration in DMSO ( $d_6$ ) with diimide **6a**

The shift of the aromatic protons of receptor **6a** was evaluated.

| [Receptor <b>6a</b> ]<br>(M) | [Trp-Gly-Trp, <b>10</b> ]<br>(M) | [G]/[H] | chemical shift<br>( $\delta$ , ppm) |
|------------------------------|----------------------------------|---------|-------------------------------------|
| 0.0051                       | 0.0000                           | 0.00    | 8.3263                              |
| 0.0051                       | 0.0012                           | 0.24    | 8.2636                              |
| 0.0051                       | 0.0023                           | 0.45    | 8.2085                              |
| 0.0051                       | 0.0033                           | 0.65    | 8.1597                              |
| 0.0051                       | 0.0043                           | 0.84    | 8.1322                              |
| 0.0051                       | 0.0052                           | 1.02    | 8.1103                              |
| 0.0051                       | 0.0068                           | 1.33    | 8.0751                              |
| 0.0051                       | 0.0082                           | 1.61    | 8.0598                              |
| 0.0051                       | 0.0095                           | 1.86    | 8.0522                              |
| 0.0051                       | 0.0120                           | 2.35    | 8.0521                              |

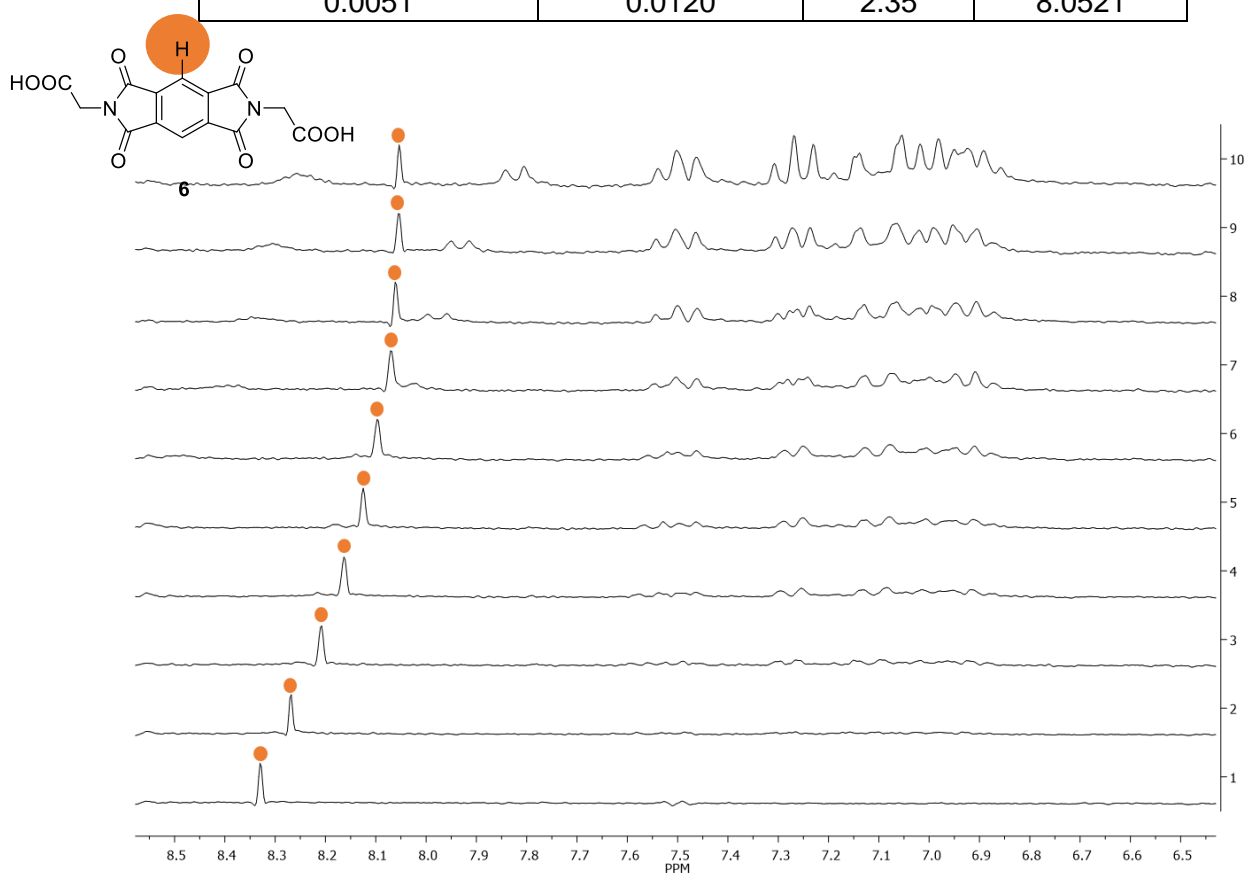

**Figure S76.**  $^1\text{H}$  NMR spectra (6.4-8.6 ppm) corresponding to titration of **6a** and Trp-Gly-Trp (**10**).

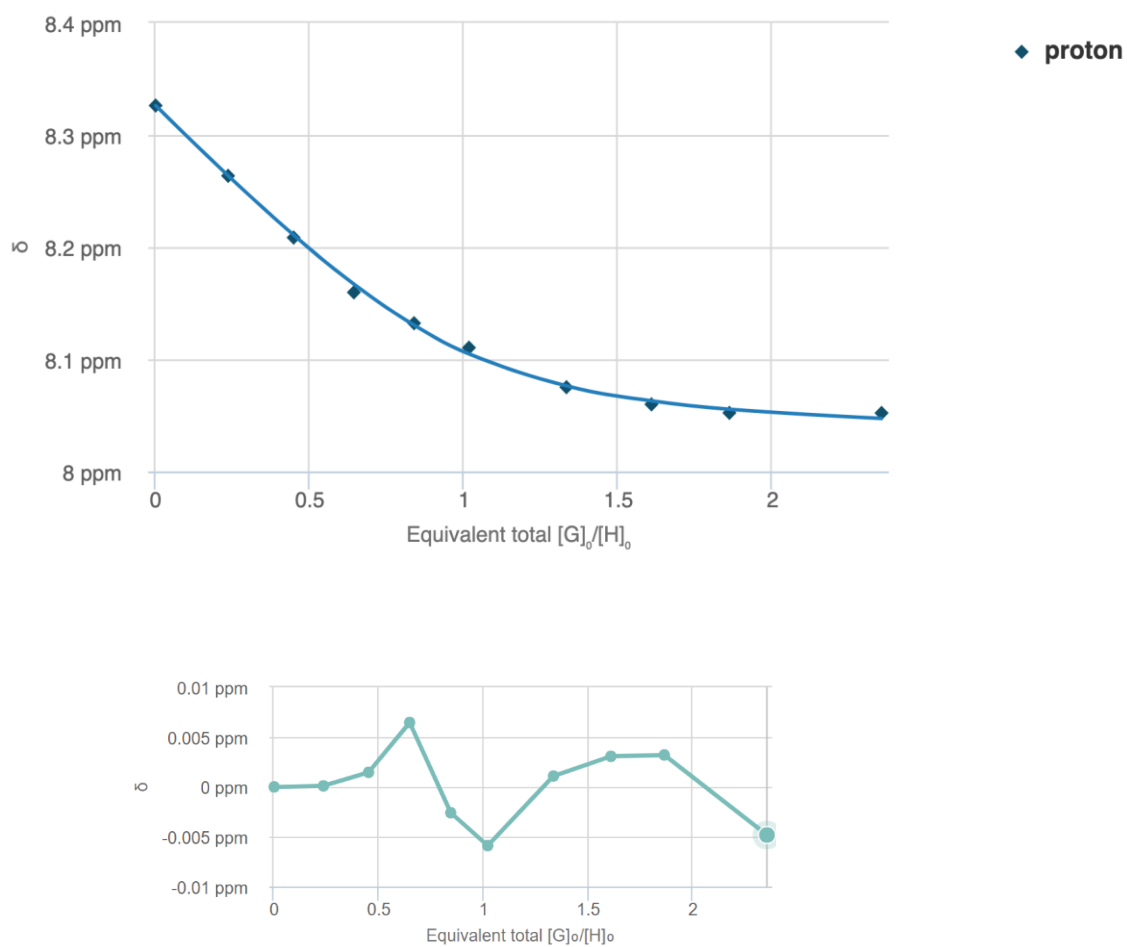

**Figure S77.** Binding isotherm corresponding to titration of receptor **6a** and Trp-Gly-Trp (**10**).

|                                        |
|----------------------------------------|
| NMR 1:1                                |
| $K_a=2108 (\pm 13.8\%) \text{ M}^{-1}$ |
| Covariance=1.5744e-3                   |

<http://app.supramolecular.org/bindfit/view/e648dd2e-6d83-4fd9-baa8-b72a56055c17>

## Comparison of the different binding models (*online web-applet BindFit[9]*)

Different binding models were considered:

- 1:1 Binding model (1 molecule diimide **6a** + 1 molecule tripeptide **10**)
- 1:2 Binding model (1 molecule diimide **6a** + 2 molecule tripeptide **10**)
- 2:1 Binding model (2 molecules diimide **6a** + 1 molecule tripeptide **10**)

Association constants are shown in table S9. Models converging on negative values (or not converging) for the association constants have not been included.

**Table S9. Association constants for the binding of diimide 6a with tripeptide 10**

| <i>Binding model</i> | $cov_{fit} (10^{-3})^a$ | $cov_{fit}$<br>factor | $K_1 (M^{-1})$          | $K_2 (M^{-1})$       |
|----------------------|-------------------------|-----------------------|-------------------------|----------------------|
| 1:1                  | 1.5744                  | 1                     | 2108 ( $\pm 13.8\%$ )   |                      |
| Non cooperative 1:2  | 0.8806                  | 1.8                   | 6430.13( $\pm 52.2\%$ ) | 1671( $\pm 52.2\%$ ) |
| Statistical 1:2      | 113.3                   | 0.01                  | 886 ( $\pm 61\%$ )      | 221 ( $\pm 61\%$ )   |
| Non cooperative 2:1  | 2.5589                  | 0.6                   | 4430 ( $\pm 69\%$ )     | 1107.5( $\pm 69\%$ ) |
| Additive 2:1         | 1.4787                  | 1                     | 1894( $\pm 26.7\%$ )    | 2.5 ( $\pm 360\%$ )  |
| Statistical 2:1      | 8.0149                  | 0.2                   | 241 ( $\pm 7\%$ )       | 60.2 ( $\pm 7\%$ )   |

<sup>a</sup> $cov_{fit}$  factor =  $cov_{fit}$  for the 1:1 model divided by the  $cov_{fit}$  for the binding model under study

Table S10 analyses chemical shifts of the diimide aromatic proton, in the free receptor (H) and in the formed complexes with tripeptide (HG<sub>2</sub> or H<sub>2</sub>G):

**Table S10. Chemical shifts for the binding of diimide 6a with tripeptide 10**

| <i>Binding model</i> | $\delta_H$ | $\delta_{HG}$ | $\delta_{HG_2}$ | $\delta_{H_2G}$ |
|----------------------|------------|---------------|-----------------|-----------------|
| 1:1                  | 8.3263     | 8.0289        |                 |                 |
| Non cooperative 1:2  |            | 8.0123        | 8.0570          |                 |
| Statistical 1:2      |            | 8.0822        | 7.9926          |                 |
| Non cooperative 2:1  |            | 7.9924        |                 | 8.2043          |
| Additive 1:2         |            | 8.0274        |                 | 7.7284          |
| Statistical 2:1      |            | 7.9736        |                 | 7.6208          |

None of the 1:2 or 2:1 binding models show better quality of fitting than the 1:1 model.

## 6.5. 2D NMR studies complexes 6a:10 in DMSO(*d*<sub>6</sub>)

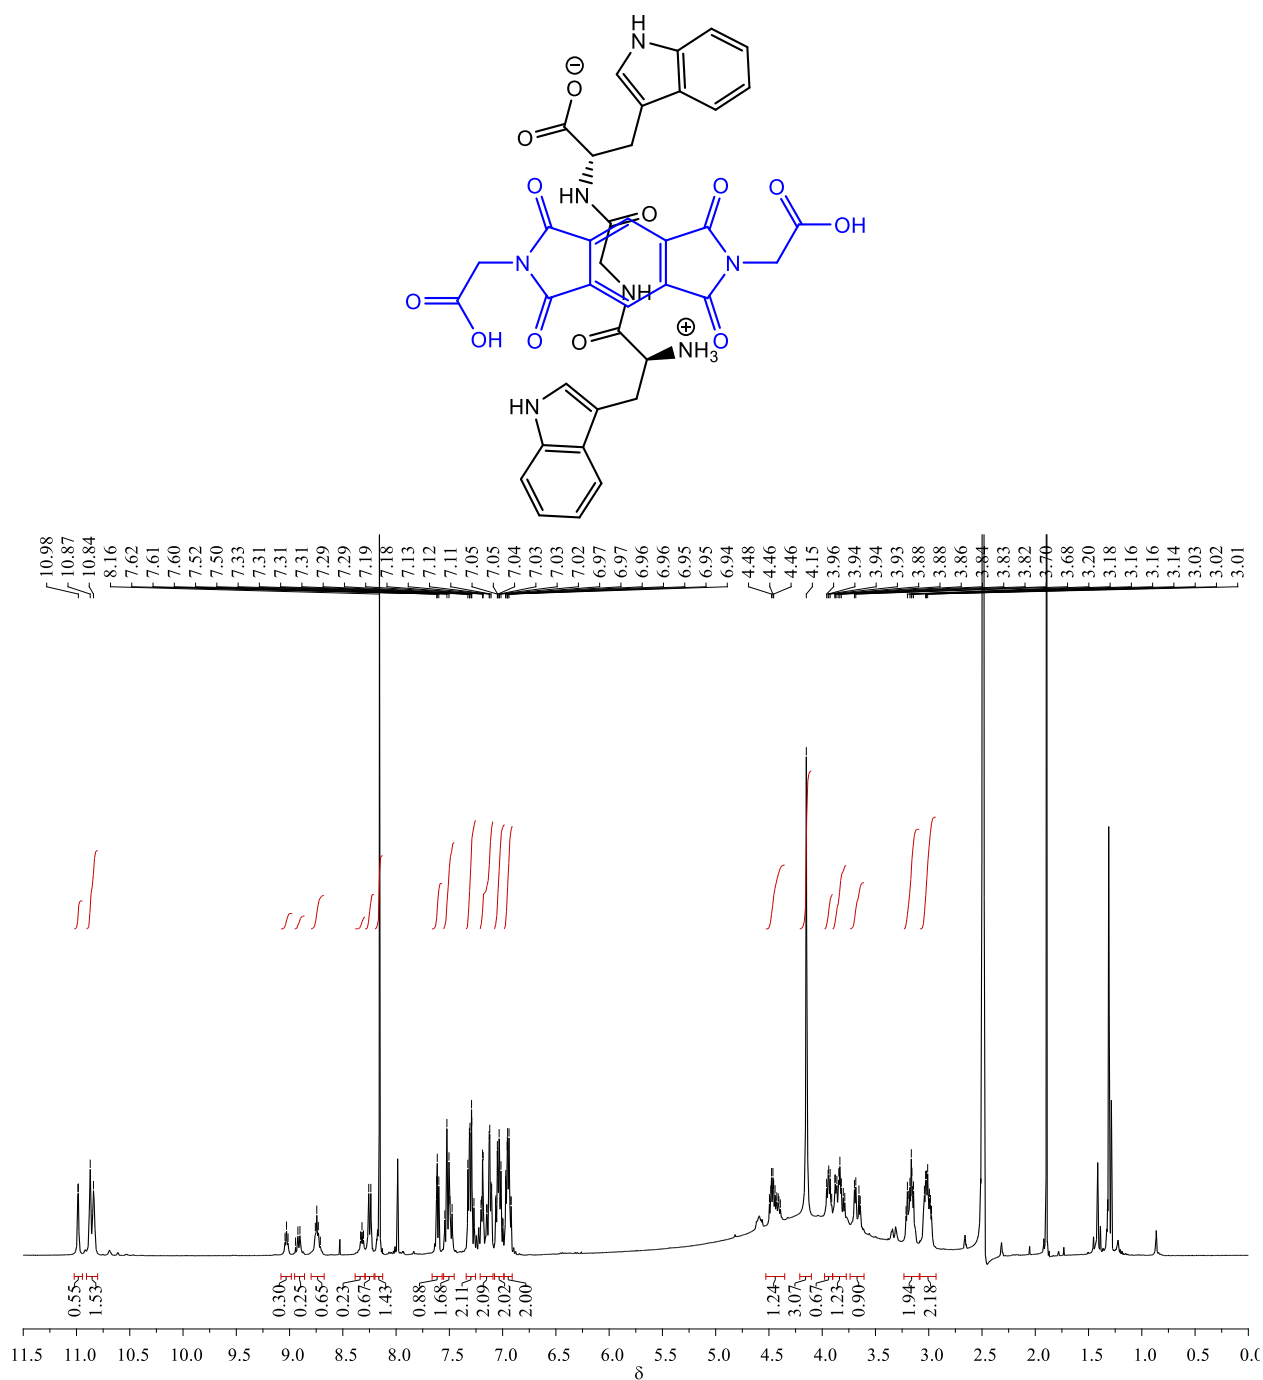

**Figure S78.** <sup>1</sup>H NMR spectrum of associate between receptor **6a** and Trp-Gly-Trp **10** in DMSO-*d*<sub>6</sub>.





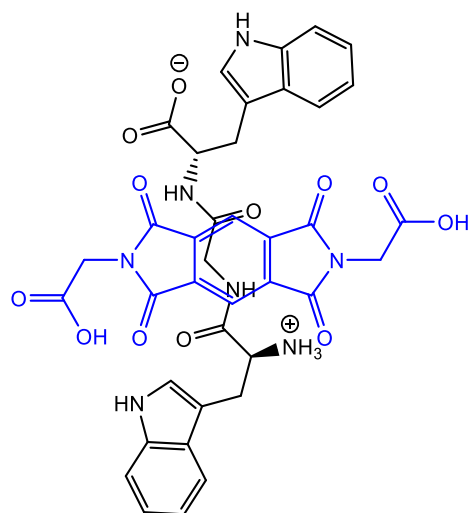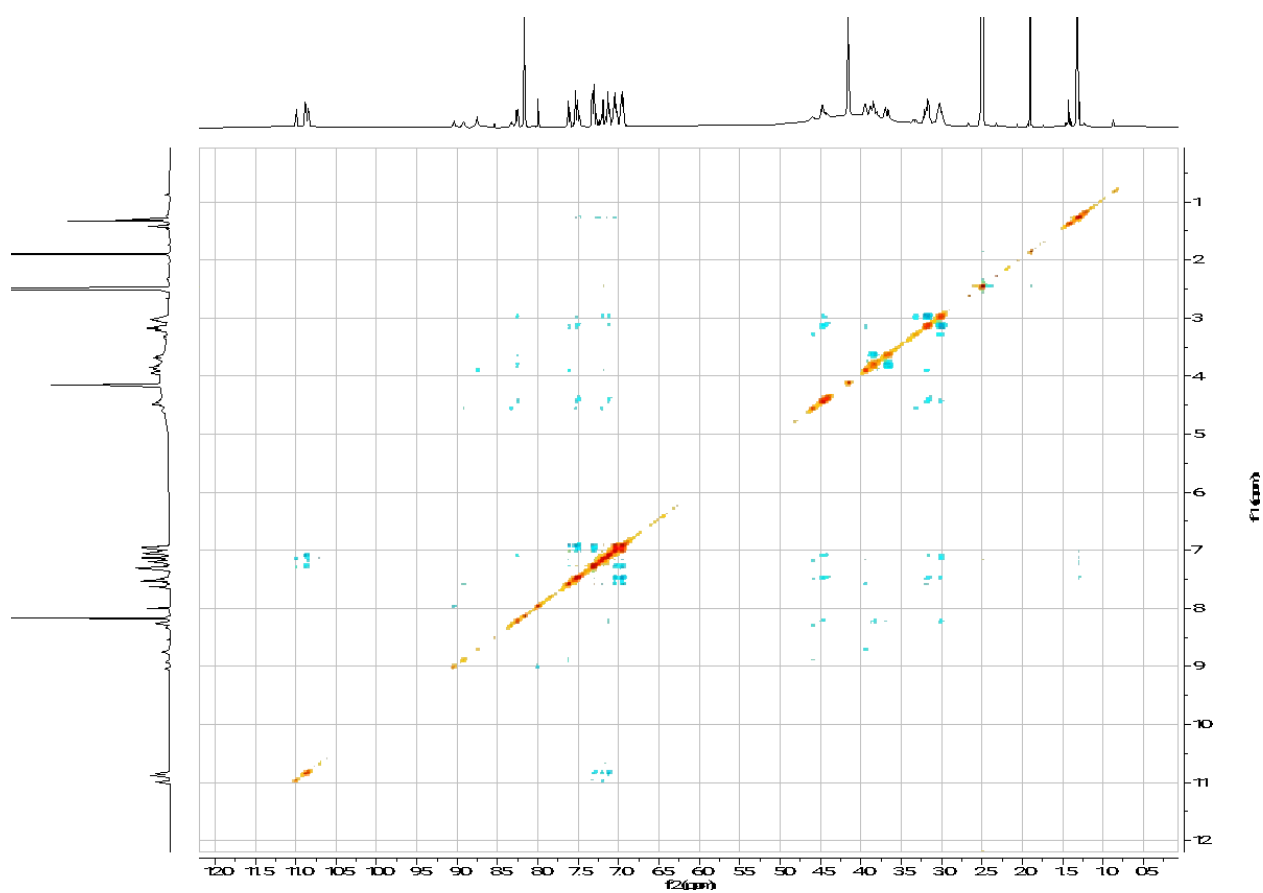

**Figure S80.** ROESY spectrum of associate between receptor 6a and Trp-Gly-Trp 10 in DMSO-d<sub>6</sub>.

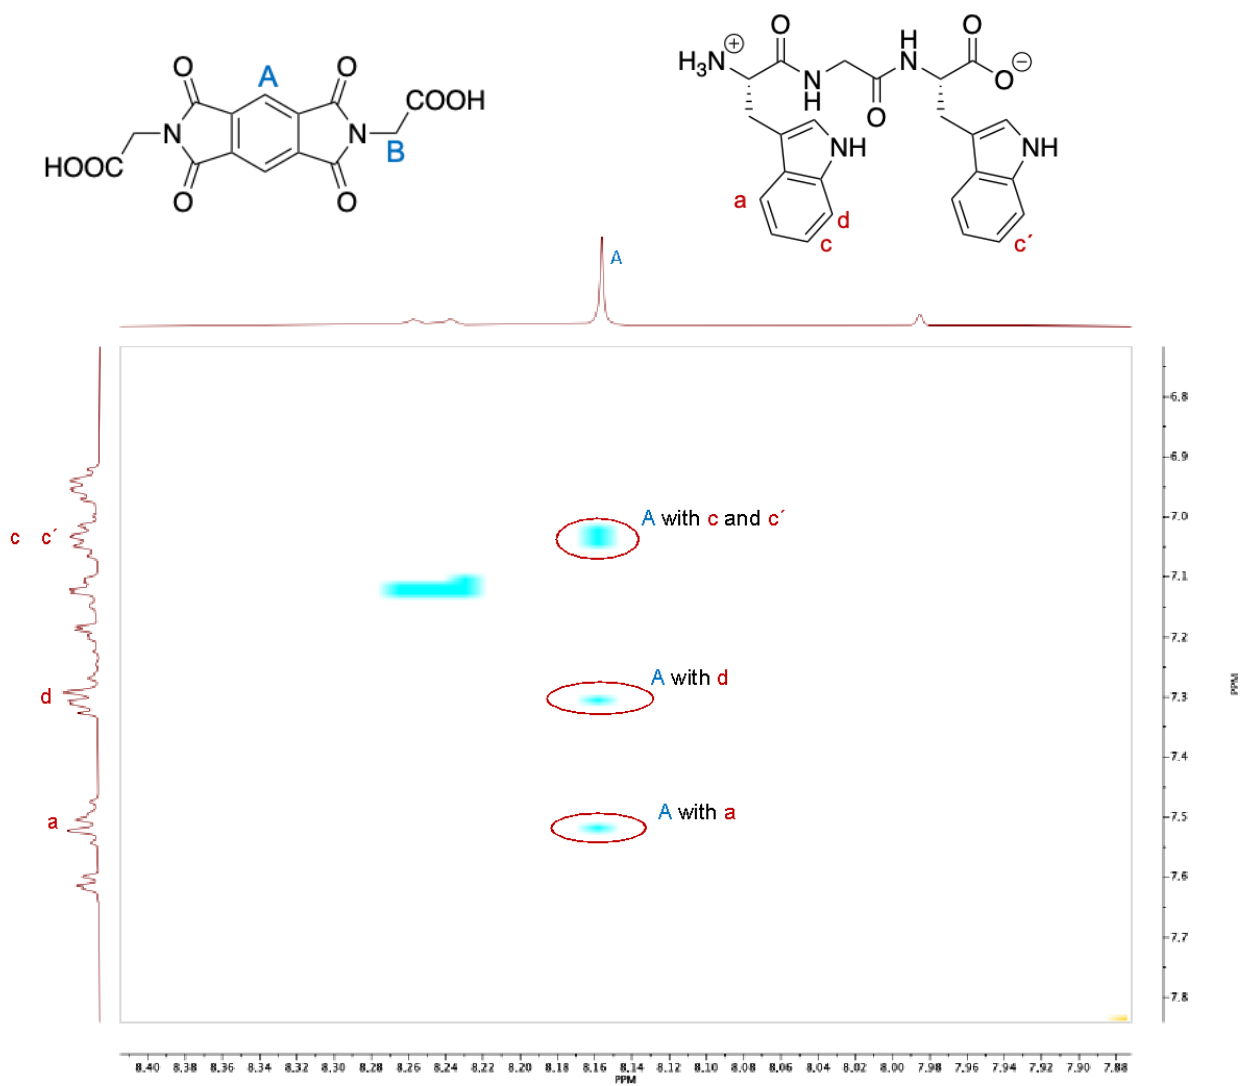

**Figure S81.** ROESY spectrum (7.80-8.40 ppm) of associate between receptor **6a** and Trp-Gly-Trp **10** in DMSO- $d_6$ .

## 7. Modelling studies

**Table S11. Coordinates for the model of the associate of receptor 6 with tripeptide Trp-Gly-Trp (10).**

| Atom  | X      | Y      | Z      | Atom  | X      | Y      | Z      |
|-------|--------|--------|--------|-------|--------|--------|--------|
| N(1)  | 3.042  | -1.686 | -1.250 | H(46) | 8.846  | 0.193  | 5.852  |
| C(2)  | 2.011  | -0.680 | -1.012 | H(47) | 7.804  | 1.938  | 4.476  |
| C(3)  | 1.400  | -0.844 | 0.372  | H(48) | 5.031  | -3.259 | -1.617 |
| N(4)  | 2.284  | -1.079 | 1.372  | H(49) | 3.266  | -3.583 | -3.937 |
| C(5)  | 1.835  | -1.233 | 2.739  | H(50) | 3.993  | -4.797 | -3.072 |
| C(6)  | 1.049  | -0.027 | 3.196  | H(51) | 5.475  | -2.081 | -4.374 |
| O(7)  | 1.060  | 1.089  | 2.752  | H(52) | 6.208  | -3.594 | -3.876 |
| O(8)  | 0.326  | -0.371 | 4.289  | H(53) | 8.662  | 0.708  | -2.044 |
| C(9)  | 3.032  | -1.450 | 3.699  | H(54) | 6.575  | 0.203  | -3.361 |
| O(10) | 0.205  | -0.740 | 0.575  | H(55) | 7.728  | -4.562 | -1.917 |
| C(11) | 4.084  | -0.366 | 3.668  | H(56) | 9.708  | -4.916 | -0.509 |
| C(12) | 5.359  | -0.443 | 4.365  | H(57) | 11.169 | -3.045 | 0.087  |
| C(13) | 6.034  | 0.767  | 4.132  | H(58) | 10.662 | -0.763 | -0.665 |
| N(14) | 5.224  | 1.541  | 3.333  | C(59) | 8.399  | 3.672  | 0.269  |
| C(15) | 4.055  | 0.843  | 3.064  | H(60) | 6.853  | -6.013 | 2.178  |
| C(16) | 5.968  | -1.429 | 5.140  | H(61) | 4.498  | -6.815 | 4.574  |
| C(17) | 7.217  | -1.185 | 5.668  | O(62) | 4.985  | -6.717 | 3.741  |
| C(18) | 7.875  | 0.027  | 5.428  | H(63) | 5.321  | -5.742 | 1.346  |
| C(19) | 7.297  | 1.010  | 4.657  | O(64) | 4.904  | -4.498 | 4.109  |
| C(20) | 3.895  | -1.595 | -2.301 | C(65) | 5.241  | -5.431 | 3.430  |
| O(21) | 3.993  | -0.596 | -2.996 | C(66) | 5.984  | -5.376 | 2.119  |
| C(22) | 4.674  | -2.885 | -2.562 | C(67) | 7.541  | -2.052 | 1.751  |
| N(23) | 3.668  | -3.846 | -3.056 | C(68) | 6.314  | -1.846 | 1.152  |
| C(24) | 5.845  | -2.634 | -3.521 | C(69) | 5.938  | -0.638 | 0.616  |
| C(25) | 6.973  | -1.881 | -2.873 | C(70) | 6.879  | 0.355  | 0.724  |
| C(26) | 8.050  | -2.445 | -2.082 | C(71) | 8.108  | 0.153  | 1.317  |
| C(27) | 8.884  | -1.377 | -1.706 | C(72) | 8.484  | -1.059 | 1.849  |
| N(28) | 8.336  | -0.221 | -2.211 | C(73) | 7.613  | -3.473 | 2.195  |
| C(29) | 7.178  | -0.545 | -2.902 | N(74) | 6.382  | -4.028 | 1.819  |
| C(30) | 8.353  | -3.734 | -1.643 | C(75) | 5.549  | -3.118 | 1.212  |
| C(31) | 9.468  | -3.933 | -0.862 | C(76) | 6.793  | 1.770  | 0.277  |
| C(32) | 10.305 | -2.862 | -0.521 | N(77) | 8.030  | 2.327  | 0.601  |
| C(33) | 10.026 | -1.581 | -0.938 | C(78) | 8.887  | 1.418  | 1.218  |
| H(34) | 2.937  | -2.586 | -0.830 | O(79) | 8.496  | -4.072 | 2.744  |
| H(35) | 2.456  | 0.302  | -1.089 | O(80) | 4.418  | -3.352 | 0.845  |
| H(36) | 1.202  | -0.751 | -1.727 | O(81) | 10.014 | 1.660  | 1.568  |
| H(37) | 3.213  | -1.363 | 1.157  | O(82) | 5.885  | 2.366  | -0.238 |
| H(38) | 1.165  | -2.076 | 2.837  | H(83) | 4.995  | -0.481 | 0.140  |
| H(39) | -0.186 | 0.374  | 4.638  | H(84) | 9.436  | -1.214 | 2.310  |
| H(40) | 2.622  | -1.529 | 4.699  | C(85) | 9.059  | 3.823  | -1.083 |
| H(41) | 3.486  | -2.405 | 3.464  | H(86) | 9.090  | 4.054  | 1.006  |

|       |       |        |       |       |       |       |        |
|-------|-------|--------|-------|-------|-------|-------|--------|
| H(42) | 5.406 | 2.473  | 3.041 | H(87) | 7.513 | 4.293 | 0.263  |
| H(43) | 3.280 | 1.286  | 2.485 | O(88) | 9.469 | 4.867 | -1.507 |
| H(44) | 5.486 | -2.374 | 5.297 | H(89) | 9.581 | 2.832 | -2.655 |
| H(45) | 7.699 | -1.931 | 6.268 | O(90) | 9.154 | 2.670 | -1.799 |

## 8. References

- [1] W. L. F. Armarego and D. D. Perrin, *Purification of Laboratory Chemicals*; 3th ed.; Pergamon Press: Oxford, 1988.
- [2] H. E. Gottlieb, V. Kotlyar and A. Nudelman, *J. Org. Chem.*, 1997, **62**, 7512-7515.
- [3] SAINT-NT Version 6.0, Madison, Wisconsin, USA: Bruker-AXS, 2001.
- [4] SADABS 2008/1, L. Krause, R. Herbst-Irmer, G. M. Sheldrick and D. Stalke. *J. Appl. Crystallogr.*, 2015, **48**, 3-10.
- [5] SHELXL 2014/4, G. M. Sheldrick, *Acta Cryst. A*, 2015, **71**, 3-8.
- [6] SHELXL 2014/7, G. M. Sheldrick, *Acta Cryst. A*, 2015, **71**, 3-8.
- [7] U. Shmueli, ed. *International Tables for Crystallography*; Springer: New York, 2006.
- [8] C. F. Macrae, P. R. Edgington, P. McCabe, E. Pidcock, G. P. Shields, R. Taylor, M. Towler and J. J. Van de Streek, *J. Appl. Cryst.*, 2006, **39**, 453-457.
- [9] (a) <http://supramolecular.org>; (b) D. B. Hibbert and P. Thordarson, *Chem. Commun.*, 2016, **52**, 12792-12805.
- [10] G. M. J. Barca, C. Bertoni, L. Carrington, D. Datta, N. De Silva, J. E. Deustua, D. G. Fedorov, J. R. Gour, A. O. Gunina, E. Guidez, T. Harville, S. Irle, J. Ivanic, K. Kowalski, S. S. Leang, H. Li, W. Li, J. J. Lutz, I. Magoulas, J. Mato, V. Mironov, H. Nakata, B. Q. Pham, P. Piecuch, D. Poole, S. R. Pruitt, A. P. Rendell, L. B. Roskop, K. Ruedenberg, T. Sattasathuchana, M. W. Schmidt, J. Shen, L. Slipchenko, M. Sosonkina, V. Sundriyal, A. Tiwari, J. L. Galvez Vallejo, B. Westheimer, M. Włoch, P. Xu, F. Zahariev, M. S. Gordon, *J. Chem. Phys.*, 2020, **152**, 154102.
- [11] (a) T. Okuyama and K. Satake, *J. Biochem.*, 1960, **47**, 454-466; (b) K. Satake, T. Okuyama, M. Ohashi and T. Shinoda, *J. Biochem.*, 1960, **47**, 654-660; (c) J. J. Arrotti and J.E. Garvin, *Biochim. Biophys. Acta*, 1972, **255**, 79-90.
- [12] L. V. Mikhalchenko, V. N. Leibzon, M. Yu. Leonova and V. P. Gulytai, *Russ. Chem. Bull., Int. Ed.*, 2016, **65**, 2216-2219.
- [13] N. Barooah, R. J. Sarma and J. B. Baruah, *Cryst. Eng. Comm*, 2006, **8**, 608-615.

## 9. UV/Vis data

**Table S12. UV-vis absorption spectroscopic titration of 3b with tryptophan**

| Wavelength (nm) | Absorbance (a.u.) receptor <b>3b</b> 10mM | Absorbance (a.u.) receptor <b>3b</b> 10mM/Trp 2.1 mM | Absorbance (a.u.) receptor <b>3b</b> 10mM/Trp 4.2 mM | Absorbance (a.u.) receptor <b>3b</b> 10mM/Trp 6.4 mM | Absorbance (a.u.) receptor <b>3b</b> 10mM/Trp 10mM | Absorbance (a.u.) receptor <b>3b</b> 10mM/Trp 13mM | Absorbance (a.u.) receptor <b>3b</b> 10mM/Trp 17mM |
|-----------------|-------------------------------------------|------------------------------------------------------|------------------------------------------------------|------------------------------------------------------|----------------------------------------------------|----------------------------------------------------|----------------------------------------------------|
| 375             | 1.20271169                                | 1.49695875                                           | 1.55027483                                           | 1.62811974                                           | 1.70507108                                         | 1.7581548                                          | 1.80423868                                         |
| 376             | 1.16950116                                | 1.48457658                                           | 1.53902702                                           | 1.63406298                                           | 1.71892117                                         | 1.78206882                                         | 1.81695804                                         |
| 377             | 1.12773879                                | 1.47246031                                           | 1.53615178                                           | 1.64189374                                           | 1.74936047                                         | 1.79945041                                         | 1.85010379                                         |
| 378             | 1.08812892                                | 1.45863298                                           | 1.5200362                                            | 1.63863109                                           | 1.74867821                                         | 1.81721456                                         | 1.87202103                                         |
| 379             | 1.04834684                                | 1.4404644                                            | 1.50562276                                           | 1.63887682                                           | 1.76457257                                         | 1.84236195                                         | 1.88625715                                         |
| 380             | 1.00756137                                | 1.42066237                                           | 1.48247424                                           | 1.62064008                                           | 1.76621727                                         | 1.84378411                                         | 1.90917783                                         |
| 381             | 0.95567588                                | 1.38413408                                           | 1.44957594                                           | 1.60225113                                           | 1.77642619                                         | 1.86270921                                         | 1.92558586                                         |
| 382             | 0.91416021                                | 1.35621186                                           | 1.42445423                                           | 1.58146671                                           | 1.75995025                                         | 1.87270078                                         | 1.93081309                                         |
| 383             | 0.87142306                                | 1.32181863                                           | 1.38836163                                           | 1.55648667                                           | 1.76472412                                         | 1.8703101                                          | 1.95565625                                         |
| 384             | 0.83999092                                | 1.29675163                                           | 1.36520041                                           | 1.5416795                                            | 1.75266517                                         | 1.87968936                                         | 1.9491178                                          |
| 385             | 0.80654427                                | 1.26578444                                           | 1.33652523                                           | 1.51279091                                           | 1.74550024                                         | 1.88472242                                         | 1.97835598                                         |
| 386             | 0.77529608                                | 1.23423461                                           | 1.30695052                                           | 1.49442951                                           | 1.73118809                                         | 1.8790972                                          | 1.95876527                                         |
| 387             | 0.75262336                                | 1.21036994                                           | 1.28585473                                           | 1.46871272                                           | 1.72611944                                         | 1.87351144                                         | 1.97699459                                         |
| 388             | 0.72624892                                | 1.18625224                                           | 1.26480045                                           | 1.44988175                                           | 1.70745598                                         | 1.87530018                                         | 1.96094299                                         |
| 389             | 0.67942794                                | 1.16726762                                           | 1.24178475                                           | 1.43122352                                           | 1.7048509                                          | 1.86366001                                         | 1.97835598                                         |
| 390             | 0.66823268                                | 1.15598284                                           | 1.23098475                                           | 1.42102862                                           | 1.69169174                                         | 1.86305759                                         | 1.9772006                                          |
| 391             | 0.64829642                                | 1.13503826                                           | 1.2105039                                            | 1.40637064                                           | 1.6818949                                          | 1.85936627                                         | 1.97526811                                         |
| 392             | 0.62882313                                | 1.11269786                                           | 1.18960619                                           | 1.38282137                                           | 1.66643184                                         | 1.85001155                                         | 1.98560549                                         |
| 393             | 0.60476973                                | 1.09024611                                           | 1.14178775                                           | 1.33849967                                           | 1.64835828                                         | 1.84178832                                         | 1.9730992                                          |
| 394             | 0.58351095                                | 1.06425602                                           | 1.15806521                                           | 1.35003265                                           | 1.60957717                                         | 1.8127896                                          | 1.94657581                                         |
| 395             | 0.557047                                  | 1.01246778                                           | 1.12986543                                           | 1.32484514                                           | 1.6294314                                          | 1.83508233                                         | 1.98957281                                         |
| 396             | 0.53163643                                | 1.02307715                                           | 1.10276894                                           | 1.30128197                                           | 1.60544326                                         | 1.83321479                                         | 1.98640448                                         |
| 397             | 0.53232089                                | 0.99390638                                           | 1.0721576                                            | 1.26990441                                           | 1.57895577                                         | 1.80958427                                         | 1.97049446                                         |
| 398             | 0.50590667                                | 0.96684977                                           | 1.04535718                                           | 1.24401849                                           | 1.5556741                                          | 1.78138575                                         | 1.96106208                                         |
| 399             | 0.48136898                                | 0.94200697                                           | 1.01891568                                           | 1.21833797                                           | 1.53485517                                         | 1.77871622                                         | 1.9683896                                          |
| 400             | 0.45861797                                | 0.91750188                                           | 0.99473793                                           | 1.1931013                                            | 1.51156211                                         | 1.76300954                                         | 1.94877028                                         |
| 401             | 0.43869105                                | 0.89109687                                           | 0.968737                                             | 1.16965516                                           | 1.48711557                                         | 1.73617464                                         | 1.92922355                                         |
| 402             | 0.41585089                                | 0.84952292                                           | 0.94163853                                           | 1.13877035                                           | 1.46450335                                         | 1.72195558                                         | 1.91346221                                         |
| 403             | 0.3985876                                 | 0.82868026                                           | 0.92204736                                           | 1.11982113                                           | 1.44071597                                         | 1.70193329                                         | 1.90745479                                         |
| 404             | 0.37659978                                | 0.80879777                                           | 0.88413996                                           | 1.09960008                                           | 1.41996504                                         | 1.67927229                                         | 1.8993538                                          |
| 405             | 0.36079251                                | 0.78931235                                           | 0.86656324                                           | 1.07599484                                           | 1.40049901                                         | 1.67021578                                         | 1.87634432                                         |
| 406             | 0.34771399                                | 0.77349031                                           | 0.85052531                                           | 1.06009157                                           | 1.3830836                                          | 1.64737375                                         | 1.87279797                                         |
| 407             | 0.33478873                                | 0.75667173                                           | 0.83418908                                           | 1.04369227                                           | 1.36413441                                         | 1.6359934                                          | 1.85176764                                         |
| 408             | 0.3231921                                 | 0.74446219                                           | 0.82149498                                           | 1.03046295                                           | 1.34999378                                         | 1.61962592                                         | 1.84847694                                         |
| 409             | 0.31297875                                | 0.73093792                                           | 0.80825564                                           | 1.01580134                                           | 1.33619547                                         | 1.60705695                                         | 1.82988504                                         |
| 410             | 0.30465055                                | 0.72135156                                           | 0.79763154                                           | 1.0036547                                            | 1.32626047                                         | 1.59954836                                         | 1.82725116                                         |
| 411             | 0.30067054                                | 0.71506419                                           | 0.79274272                                           | 0.99927967                                           | 1.3157293                                          | 1.58752265                                         | 1.81950137                                         |
| 412             | 0.2963347                                 | 0.71073889                                           | 0.7855907                                            | 0.97750977                                           | 1.31280111                                         | 1.58685117                                         | 1.81996019                                         |
| 413             | 0.28835471                                | 0.69975025                                           | 0.77605264                                           | 0.96824019                                           | 1.30046578                                         | 1.57136315                                         | 1.80068374                                         |
| 414             | 0.28227375                                | 0.69106869                                           | 0.76758841                                           | 0.95621344                                           | 1.28934963                                         | 1.5615526                                          | 1.79822063                                         |
| 415             | 0.27438562                                | 0.68266179                                           | 0.75755049                                           | 0.94818014                                           | 1.27875839                                         | 1.55321437                                         | 1.78122823                                         |
| 416             | 0.26769875                                | 0.67287412                                           | 0.74814772                                           | 0.93841559                                           | 1.26564829                                         | 1.53979398                                         | 1.77863793                                         |
| 417             | 0.25854661                                | 0.66128061                                           | 0.73779341                                           | 0.92561147                                           | 1.25282912                                         | 1.5300455                                          | 1.76117637                                         |
| 418             | 0.24981572                                | 0.65099657                                           | 0.72709372                                           | 0.91409964                                           | 1.2409822                                          | 1.51355536                                         | 1.75202674                                         |
| 419             | 0.24373903                                | 0.64242532                                           | 0.71835542                                           | 0.90494578                                           | 1.22695263                                         | 1.50452502                                         | 1.73743027                                         |

|     |            |             |            |            |            |            |            |
|-----|------------|-------------|------------|------------|------------|------------|------------|
| 420 | 0.23565943 | 0.63244657  | 0.7070111  | 0.8930446  | 1.21670399 | 1.48969633 | 1.72778696 |
| 421 | 0.22970408 | 0.62305277  | 0.6988962  | 0.88395043 | 1.20276712 | 1.47655271 | 1.71356597 |
| 422 | 0.22207391 | 0.61402751  | 0.68916018 | 0.87272667 | 1.19130298 | 1.46701643 | 1.70427898 |
| 423 | 0.21731743 | 0.60669511  | 0.68007404 | 0.86475604 | 1.18082471 | 1.45268077 | 1.69117955 |
| 424 | 0.21066397 | 0.59356882  | 0.6719447  | 0.85311573 | 1.1679959  | 1.43783805 | 1.6750594  |
| 425 | 0.20641356 | 0.58620084  | 0.66303219 | 0.8454817  | 1.158334   | 1.42903696 | 1.66665349 |
| 426 | 0.20084493 | 0.577711485 | 0.65468706 | 0.83447969 | 1.14336169 | 1.41375034 | 1.64853225 |
| 427 | 0.1951269  | 0.57056107  | 0.644673   | 0.82685164 | 1.12300899 | 1.40264491 | 1.64118982 |
| 428 | 0.19138667 | 0.56263953  | 0.63668891 | 0.81807073 | 1.11454267 | 1.39206268 | 1.6242267  |
| 429 | 0.18635299 | 0.55588179  | 0.62867534 | 0.8071511  | 1.10056256 | 1.37824229 | 1.61207655 |
| 430 | 0.18340543 | 0.54967851  | 0.62315852 | 0.80205817 | 1.09313182 | 1.36792755 | 1.60143506 |
| 431 | 0.17865682 | 0.54270865  | 0.61561432 | 0.7918866  | 1.08192249 | 1.35392972 | 1.58913846 |
| 432 | 0.1779091  | 0.53843845  | 0.61089776 | 0.78705636 | 1.0755553  | 1.3469709  | 1.57477562 |
| 433 | 0.1759497  | 0.53668942  | 0.60946582 | 0.78424351 | 1.07176808 | 1.34355679 | 1.57857708 |
| 434 | 0.17460571 | 0.53198813  | 0.60390359 | 0.77757489 | 1.06310442 | 1.33322938 | 1.56258241 |
| 435 | 0.1703798  | 0.52539769  | 0.59709927 | 0.76899454 | 1.05330216 | 1.32370887 | 1.55229944 |
| 436 | 0.16710867 | 0.51792861  | 0.58926158 | 0.76098849 | 1.041962   | 1.3085295  | 1.53564459 |
| 437 | 0.16343981 | 0.51224955  | 0.58314486 | 0.75304864 | 1.0323023  | 1.29519768 | 1.52651302 |
| 438 | 0.15974959 | 0.50345224  | 0.5747316  | 0.74343858 | 1.01817235 | 1.28156474 | 1.50645831 |
| 439 | 0.15539115 | 0.4956175   | 0.56573777 | 0.72867194 | 1.00622    | 1.26383464 | 1.49012572 |
| 440 | 0.15171478 | 0.48653067  | 0.55647258 | 0.71669877 | 0.98861989 | 1.24648589 | 1.46924976 |
| 441 | 0.14796796 | 0.47838338  | 0.54723864 | 0.70683861 | 0.97523118 | 1.21898464 | 1.44908711 |
| 442 | 0.14483111 | 0.47018481  | 0.53893988 | 0.69580037 | 0.96034007 | 1.2028225  | 1.42810494 |
| 443 | 0.14052904 | 0.46053999  | 0.5284443  | 0.6829191  | 0.94420896 | 1.1828182  | 1.40635954 |
| 444 | 0.13656768 | 0.4516499   | 0.51946989 | 0.67086665 | 0.92803335 | 1.16248732 | 1.38432344 |
| 445 | 0.13378655 | 0.44263236  | 0.51006119 | 0.6600817  | 0.91412458 | 1.14554213 | 1.36375288 |

**Table S13. UV-vis absorption spectroscopic titration of 3b with tryptophan methyl ester hydrochloride**

| Wavelength (nm) | Absorbance (a.u.) receptor <b>3b</b> 10mM | Absorbance (a.u.) <b>3b</b> 10mM + <b>1a</b> 2.2 mM | Absorbance (a.u.) receptor <b>3b</b> 10mM + <b>1a</b> 4.1 mM | Absorbance (a.u.) receptor <b>3b</b> 10mM + <b>1a</b> 6.2 mM | Absorbance (a.u.) receptor <b>3b</b> 10mM + <b>1a</b> 10mM | Absorbance (a.u.) receptor <b>3b</b> 10mM+ <b>1a</b> 16.5 mM |
|-----------------|-------------------------------------------|-----------------------------------------------------|--------------------------------------------------------------|--------------------------------------------------------------|------------------------------------------------------------|--------------------------------------------------------------|
| 375             | 1.19887769                                | 1.73652964                                          | 1.99430483                                                   | 2.12848544                                                   | 2.391795                                                   | 2.59550838                                                   |
| 376             | 1.16574466                                | 1.72556501                                          | 2.01193181                                                   | 2.12563415                                                   | 2.39728908                                                 | 2.72216167                                                   |
| 377             | 1.12355701                                | 1.70867557                                          | 1.979473                                                     | 2.12691201                                                   | 2.45456918                                                 | 2.65521486                                                   |
| 378             | 1.08243675                                | 1.68598522                                          | 1.96577272                                                   | 2.12096149                                                   | 2.39394127                                                 | 2.68193666                                                   |
| 379             | 1.04089657                                | 1.65728131                                          | 1.96433017                                                   | 2.10835105                                                   | 2.39566591                                                 | 2.67243676                                                   |
| 380             | 0.9991496                                 | 1.63891465                                          | 1.93930216                                                   | 2.091247                                                     | 2.39115318                                                 | 2.65777477                                                   |
| 381             | 0.94677936                                | 1.58762345                                          | 1.89408126                                                   | 2.07150174                                                   | 2.33847128                                                 | 2.71354352                                                   |
| 382             | 0.90296146                                | 1.56224944                                          | 1.88988188                                                   | 2.05888625                                                   | 2.35085994                                                 | 2.6595559                                                    |
| 383             | 0.85636387                                | 1.52134693                                          | 1.84639852                                                   | 2.01313874                                                   | 2.34765695                                                 | 2.66474275                                                   |
| 384             | 0.82467956                                | 1.49238696                                          | 1.82576569                                                   | 2.01161945                                                   | 2.3183066                                                  | 2.66514432                                                   |
| 385             | 0.79160972                                | 1.46620252                                          | 1.80531919                                                   | 1.9696027                                                    | 2.32102664                                                 | 2.64073384                                                   |
| 386             | 0.75686763                                | 1.44021302                                          | 1.77327125                                                   | 1.96814736                                                   | 2.30918395                                                 | 2.67860874                                                   |
| 387             | 0.73375653                                | 1.41337894                                          | 1.7490192                                                    | 1.94469812                                                   | 2.27474194                                                 | 2.65975426                                                   |
| 388             | 0.706401                                  | 1.39228771                                          | 1.72367609                                                   | 1.92350519                                                   | 2.29047563                                                 | 2.60067247                                                   |
| 389             | 0.65856151                                | 1.37420411                                          | 1.71192972                                                   | 1.90685858                                                   | 2.2798407                                                  | 2.6178028                                                    |
| 390             | 0.64647998                                | 1.36369269                                          | 1.69656633                                                   | 1.90069927                                                   | 2.25080495                                                 | 2.6147513                                                    |
| 391             | 0.62570634                                | 1.34202677                                          | 1.68202021                                                   | 1.88071112                                                   | 2.2478747                                                  | 2.59277909                                                   |
| 392             | 0.60278499                                | 1.32456997                                          | 1.66717792                                                   | 1.8715361                                                    | 2.21438548                                                 | 2.56304265                                                   |
| 393             | 0.58014666                                | 1.30079553                                          | 1.64435696                                                   | 1.83612334                                                   | 2.18862609                                                 | 2.55940573                                                   |
| 394             | 0.55746064                                | 1.27466837                                          | 1.61939084                                                   | 1.83537952                                                   | 2.19178902                                                 | 2.51970555                                                   |
| 395             | 0.53027809                                | 1.22947198                                          | 1.57191382                                                   | 1.77905552                                                   | 2.13324021                                                 | 2.50445565                                                   |
| 396             | 0.50277032                                | 1.24482668                                          | 1.58073837                                                   | 1.79083366                                                   | 2.16889844                                                 | 2.53670439                                                   |
| 397             | 0.50357409                                | 1.2175417                                           | 1.55770841                                                   | 1.76212964                                                   | 2.13035767                                                 | 2.48161769                                                   |
| 398             | 0.47608714                                | 1.19270178                                          | 1.53745228                                                   | 1.73608                                                      | 2.10463271                                                 | 2.49498577                                                   |
| 399             | 0.45083607                                | 1.16937282                                          | 1.50949373                                                   | 1.7224137                                                    | 2.08144546                                                 | 2.46699099                                                   |
| 400             | 0.4311989                                 | 1.1504086                                           | 1.48940135                                                   | 1.69842748                                                   | 2.07283502                                                 | 2.4285241                                                    |
| 401             | 0.40982717                                | 1.12674335                                          | 1.46485784                                                   | 1.67489502                                                   | 2.05789271                                                 | 2.44141141                                                   |
| 402             | 0.38543075                                | 1.10422395                                          | 1.44006944                                                   | 1.65686725                                                   | 2.02849223                                                 | 2.39793999                                                   |
| 403             | 0.364469                                  | 1.08617556                                          | 1.42402743                                                   | 1.6341939                                                    | 2.01732181                                                 | 2.37716454                                                   |
| 404             | 0.34612498                                | 1.06699382                                          | 1.40656991                                                   | 1.61557489                                                   | 1.99216692                                                 | 2.38310456                                                   |
| 405             | 0.33187978                                | 1.05043925                                          | 1.38939308                                                   | 1.60310354                                                   | 1.96948125                                                 | 2.35369432                                                   |
| 406             | 0.31871984                                | 1.03885901                                          | 1.37454351                                                   | 1.5845592                                                    | 1.94973629                                                 | 2.35723878                                                   |
| 407             | 0.30521321                                | 1.02491301                                          | 1.36224015                                                   | 1.57471038                                                   | 1.95557785                                                 | 2.32771738                                                   |
| 408             | 0.29562037                                | 1.01325514                                          | 1.34901292                                                   | 1.56594233                                                   | 1.92959267                                                 | 2.32697909                                                   |
| 409             | 0.28465278                                | 1.003392                                            | 1.33779009                                                   | 1.54645234                                                   | 1.91257353                                                 | 2.32651832                                                   |
| 410             | 0.27601843                                | 0.9951844                                           | 1.32778204                                                   | 1.54193654                                                   | 1.9181848                                                  | 2.29277057                                                   |
| 411             | 0.27258806                                | 0.98998852                                          | 1.32305047                                                   | 1.53713802                                                   | 1.90689364                                                 | 2.29370906                                                   |
| 412             | 0.26873526                                | 0.98612255                                          | 1.31959195                                                   | 1.53323614                                                   | 1.89575195                                                 | 2.30338155                                                   |
| 413             | 0.26082256                                | 0.97211653                                          | 1.31223924                                                   | 1.52065508                                                   | 1.8905902                                                  | 2.27010658                                                   |
| 414             | 0.2539959                                 | 0.95681462                                          | 1.30325056                                                   | 1.51426438                                                   | 1.89255258                                                 | 2.27711939                                                   |
| 415             | 0.24684989                                | 0.94853105                                          | 1.29429875                                                   | 1.50260036                                                   | 1.87729275                                                 | 2.25696086                                                   |
| 416             | 0.23968536                                | 0.94242518                                          | 1.28843741                                                   | 1.49833836                                                   | 1.86883061                                                 | 2.26568033                                                   |
| 417             | 0.23207719                                | 0.93245676                                          | 1.27597822                                                   | 1.48695563                                                   | 1.85319003                                                 | 2.23777173                                                   |
| 418             | 0.22373113                                | 0.9261204                                           | 1.26883044                                                   | 1.47474781                                                   | 1.85118149                                                 | 2.24169383                                                   |
| 419             | 0.21838249                                | 0.91829991                                          | 1.26019039                                                   | 1.46988998                                                   | 1.84055313                                                 | 2.21331956                                                   |
| 420             | 0.21122515                                | 0.91101388                                          | 1.25249498                                                   | 1.45963296                                                   | 1.82988504                                                 | 2.22592119                                                   |



|     |            |            |            |            |            |            |
|-----|------------|------------|------------|------------|------------|------------|
| 421 | 0.20547359 | 0.90386545 | 1.24408705 | 1.45386466 | 1.81981675 | 2.19907682 |
| 422 | 0.19947811 | 0.8975869  | 1.23668434 | 1.44268533 | 1.81157778 | 2.20391158 |
| 423 | 0.19426676 | 0.89167183 | 1.23160612 | 1.43867198 | 1.80294009 | 2.18098281 |
| 424 | 0.18972511 | 0.88603327 | 1.22386567 | 1.42904865 | 1.79792057 | 2.19158646 |
| 425 | 0.18531565 | 0.88038452 | 1.21843849 | 1.4271981  | 1.78871924 | 2.16310649 |
| 426 | 0.17920301 | 0.87458056 | 1.21082839 | 1.41573664 | 1.78196369 | 2.17659097 |
| 427 | 0.17541215 | 0.87060017 | 1.20756628 | 1.41077669 | 1.77634831 | 2.15045776 |
| 428 | 0.17206689 | 0.86579102 | 1.20132174 | 1.40635954 | 1.77029258 | 2.15745315 |
| 429 | 0.16761246 | 0.85989439 | 1.19637902 | 1.40119856 | 1.76187861 | 2.13774932 |
| 430 | 0.16436649 | 0.85745723 | 1.1907636  | 1.39792914 | 1.75451202 | 2.1412824  |
| 431 | 0.16066153 | 0.8514868  | 1.18654578 | 1.39072583 | 1.75151179 | 2.13996161 |
| 432 | 0.15889842 | 0.85044527 | 1.18504691 | 1.38857411 | 1.75131578 | 2.1170772  |
| 433 | 0.15761358 | 0.84832988 | 1.18234209 | 1.38537696 | 1.74119518 | 2.12790202 |
| 434 | 0.15566513 | 0.84517449 | 1.18072594 | 1.3813976  | 1.74620178 | 2.12813529 |
| 435 | 0.15219605 | 0.84095344 | 1.1739122  | 1.3792603  | 1.73463964 | 2.11855828 |
| 436 | 0.14968344 | 0.8372385  | 1.16110684 | 1.37261367 | 1.72450435 | 2.10160394 |
| 437 | 0.14682944 | 0.83242274 | 1.15764667 | 1.36689529 | 1.72799586 | 2.10835105 |
| 438 | 0.14305854 | 0.8281946  | 1.15104768 | 1.35961796 | 1.71853483 | 2.0871936  |
| 439 | 0.14003175 | 0.82167641 | 1.14518403 | 1.35606396 | 1.70546763 | 2.07826151 |
| 440 | 0.13668667 | 0.8171661  | 1.13727244 | 1.34707713 | 1.70219575 | 2.08539244 |
| 441 | 0.13327858 | 0.81128521 | 1.13326381 | 1.33996028 | 1.6890519  | 2.0627831  |
| 442 | 0.13070958 | 0.80697007 | 1.12666776 | 1.33300494 | 1.68085229 | 2.05675285 |
| 443 | 0.12670381 | 0.79975431 | 1.11784562 | 1.32648148 | 1.67786342 | 2.05983226 |
| 444 | 0.12447862 | 0.79442214 | 1.11162952 | 1.31869543 | 1.66316019 | 2.03692082 |
| 445 | 0.12136332 | 0.78857507 | 1.10568946 | 1.30939642 | 1.66092637 | 2.02728818 |

**Table S14. UV-vis absorption spectroscopic titration of tryptophan with 6b**

| Wavelength (nm) | Absorbance (a.u.) Trp 10mM | Absorbance (a.u.) Trp 10mM+ 6b 2.1mM | Absorbance (a.u.) Trp 10mM+ 6b 4.2 mM | Absorbance (a.u.) Trp 10mM+ 6b 6.4mM | Absorbance (a.u.) Trp 10mM+ 6b 10mM | Absorbance (a.u.) Trp 10mM+ 6b 13mM | Absorbance (a.u.) Trp 10mM+ 6b 17mM | Absorbance (a.u.) Trp 10mM+ 6b 21mM |
|-----------------|----------------------------|--------------------------------------|---------------------------------------|--------------------------------------|-------------------------------------|-------------------------------------|-------------------------------------|-------------------------------------|
| 375             | -0.0484837                 | -0.0414748                           | 0.0261008                             | 0.04462449                           | 0.12794169                          | 0.21663603                          | 0.58901875                          | 0.90918842                          |
| 376             | -0.0411265                 | -0.0340145                           | 0.03043872                            | 0.0502388                            | 0.13055704                          | 0.21738549                          | 0.58639346                          | 0.90423804                          |
| 377             | -0.0330046                 | -0.0282934                           | 0.02682456                            | 0.05459741                           | 0.13688185                          | 0.21944005                          | 0.58723547                          | 0.9038933                           |
| 378             | -0.0238087                 | -0.0169891                           | 0.03504964                            | 0.06194284                           | 0.14110925                          | 0.22569476                          | 0.58887715                          | 0.90431119                          |
| 379             | -0.0116119                 | -0.0068086                           | 0.0447299                             | 0.06256387                           | 0.1506574                           | 0.2331843                           | 0.59364381                          | 0.90860389                          |
| 380             | -0.0037715                 | 0.00164431                           | 0.05433648                            | 0.06991533                           | 0.157082                            | 0.2383232                           | 0.60356876                          | 0.90963614                          |
| 381             | 0.00480328                 | 0.0109486                            | 0.06206909                            | 0.07829376                           | 0.16307361                          | 0.24345363                          | 0.57137774                          | 0.90975255                          |
| 382             | 0.01589999                 | 0.02024909                           | 0.07063984                            | 0.08703702                           | 0.17054764                          | 0.25013466                          | 0.57649854                          | 0.91385739                          |
| 383             | 0.02836099                 | 0.03394653                           | 0.0848905                             | 0.09848063                           | 0.1818236                           | 0.26253782                          | 0.5847845                           | 0.91862388                          |
| 384             | 0.03959107                 | 0.04569138                           | 0.09677814                            | 0.11139766                           | 0.19157631                          | 0.27190441                          | 0.5910244                           | 0.92531151                          |
| 385             | 0.0535492                  | 0.05953681                           | 0.10792211                            | 0.12410683                           | 0.20357349                          | 0.28170183                          | 0.60165713                          | 0.93204062                          |
| 386             | 0.06701565                 | 0.07300967                           | 0.12146442                            | 0.13542959                           | 0.21479052                          | 0.29401578                          | 0.61010599                          | 0.93795982                          |
| 387             | 0.07765346                 | 0.08359027                           | 0.13258616                            | 0.14716269                           | 0.22461824                          | 0.30260064                          | 0.61856724                          | 0.94510365                          |
| 388             | 0.0869065                  | 0.09273112                           | 0.14159695                            | 0.1536895                            | 0.23243972                          | 0.30915207                          | 0.62361651                          | 0.94892084                          |
| 389             | 0.09274938                 | 0.0989898                            | 0.14795268                            | 0.16148523                           | 0.23819918                          | 0.31597285                          | 0.62912806                          | 0.95263166                          |
| 390             | 0.09721521                 | 0.10313717                           | 0.15161993                            | 0.16633662                           | 0.24226851                          | 0.32005089                          | 0.63106262                          | 0.95496273                          |
| 391             | 0.10200806                 | 0.10954543                           | 0.15825461                            | 0.17171464                           | 0.24688056                          | 0.32460208                          | 0.63368725                          | 0.95784996                          |
| 392             | 0.10874752                 | 0.11539832                           | 0.16352524                            | 0.17649444                           | 0.25098916                          | 0.32982559                          | 0.63840436                          | 0.95755052                          |
| 393             | 0.12421553                 | 0.12092825                           | 0.16822618                            | 0.18209698                           | 0.25582284                          | 0.33306382                          | 0.64096936                          | 0.93430455                          |
| 394             | 0.14589082                 | 0.15729654                           | 0.20543806                            | 0.18645371                           | 0.24940755                          | 0.33595349                          | 0.64174717                          | 0.96077233                          |
| 395             | 0.15047126                 | 0.15675224                           | 0.20424019                            | 0.22102289                           | 0.2525835                           | 0.36591288                          | 0.66411704                          | 0.97422731                          |
| 396             | 0.15284948                 | 0.15946675                           | 0.2065896                             | 0.21903929                           | 0.2855688                           | 0.36212217                          | 0.66762821                          | 0.96978899                          |
| 397             | 0.15279641                 | 0.16069484                           | 0.20762163                            | 0.2188775                            | 0.27993002                          | 0.36204223                          | 0.66477283                          | 0.96747793                          |
| 398             | 0.15391166                 | 0.15997424                           | 0.20626128                            | 0.21793247                           | 0.2800335                           | 0.35974321                          | 0.66138814                          | 0.96174157                          |
| 399             | 0.15305023                 | 0.15993534                           | 0.206033                              | 0.21725442                           | 0.27827097                          | 0.35743854                          | 0.65634332                          | 0.95677139                          |
| 400             | 0.15214919                 | 0.15723604                           | 0.20353879                            | 0.21500634                           | 0.27483844                          | 0.34970122                          | 0.65277148                          | 0.94840762                          |
| 401             | 0.1508061                  | 0.15649064                           | 0.20063464                            | 0.21265645                           | 0.27183053                          | 0.34691102                          | 0.64608954                          | 0.94117176                          |
| 402             | 0.14802474                 | 0.15416554                           | 0.1992245                             | 0.20879304                           | 0.26628283                          | 0.34145348                          | 0.64014934                          | 0.93140975                          |
| 403             | 0.14591451                 | 0.15124757                           | 0.19544897                            | 0.20591437                           | 0.26391841                          | 0.33739418                          | 0.63201082                          | 0.92283567                          |
| 404             | 0.14324876                 | 0.1487343                            | 0.19378064                            | 0.20207216                           | 0.26020146                          | 0.33246302                          | 0.62745988                          | 0.91758808                          |
| 405             | 0.14051344                 | 0.14615702                           | 0.18981387                            | 0.19831923                           | 0.25581425                          | 0.3268786                           | 0.62056939                          | 0.89118139                          |
| 406             | 0.1386568                  | 0.14409698                           | 0.18804246                            | 0.19582853                           | 0.25155536                          | 0.32264857                          | 0.61491951                          | 0.88321964                          |
| 407             | 0.13663727                 | 0.14166015                           | 0.18496977                            | 0.19399986                           | 0.24827527                          | 0.31799128                          | 0.60940045                          | 0.87703093                          |
| 408             | 0.13454186                 | 0.13959254                           | 0.18164474                            | 0.19093816                           | 0.24600276                          | 0.3150317                           | 0.6039123                           | 0.87009431                          |
| 409             | 0.13221561                 | 0.13703663                           | 0.17938021                            | 0.18644437                           | 0.24178624                          | 0.3100495                           | 0.59785043                          | 0.86335867                          |
| 410             | 0.13133439                 | 0.13469641                           | 0.17738018                            | 0.18458695                           | 0.23809773                          | 0.30742802                          | 0.59333042                          | 0.85742908                          |
| 411             | 0.13032309                 | 0.13478527                           | 0.17606822                            | 0.18286781                           | 0.23595766                          | 0.30505452                          | 0.59008209                          | 0.85424127                          |
| 412             | 0.12930354                 | 0.13395735                           | 0.17495059                            | 0.18207119                           | 0.23526358                          | 0.30344005                          | 0.58825236                          | 0.849947                            |
| 413             | 0.12686141                 | 0.13246653                           | 0.1721934                             | 0.18070423                           | 0.23196085                          | 0.29870752                          | 0.58244194                          | 0.84466702                          |
| 414             | 0.12525563                 | 0.12971847                           | 0.17062999                            | 0.17714241                           | 0.22924959                          | 0.29545402                          | 0.57845859                          | 0.83947144                          |
| 415             | 0.12364186                 | 0.127821                             | 0.16858393                            | 0.17456349                           | 0.22557504                          | 0.29139811                          | 0.57239381                          | 0.83248478                          |
| 416             | 0.12107399                 | 0.12540165                           | 0.16583624                            | 0.17170107                           | 0.22307738                          | 0.28867201                          | 0.56700507                          | 0.82536752                          |
| 417             | 0.11742196                 | 0.12106307                           | 0.16235666                            | 0.16805027                           | 0.21809963                          | 0.28353838                          | 0.55970503                          | 0.81765671                          |
| 418             | 0.11602247                 | 0.11873347                           | 0.16015069                            | 0.16383165                           | 0.21387351                          | 0.27790679                          | 0.55417167                          | 0.80874465                          |
| 419             | 0.11305151                 | 0.11702603                           | 0.15642028                            | 0.16223486                           | 0.21104298                          | 0.27377011                          | 0.54488701                          | 0.80102693                          |
| 420             | 0.1118475                  | 0.11402284                           | 0.15343837                            | 0.15876195                           | 0.20721131                          | 0.27009528                          | 0.53770084                          | 0.79274003                          |
| 421             | 0.10926609                 | 0.11216788                           | 0.15005325                            | 0.15432908                           | 0.20329945                          | 0.26471334                          | 0.53229572                          | 0.78615037                          |

|     |            |            |            |            |            |            |            |            |
|-----|------------|------------|------------|------------|------------|------------|------------|------------|
| 422 | 0.10772448 | 0.11020095 | 0.14763712 | 0.15182936 | 0.19990527 | 0.26084078 | 0.52633058 | 0.77759572 |
| 423 | 0.10649347 | 0.10816548 | 0.14593273 | 0.14921045 | 0.19678673 | 0.25771803 | 0.52071845 | 0.77141742 |
| 424 | 0.10370091 | 0.10576148 | 0.14308269 | 0.1461838  | 0.19311287 | 0.25261226 | 0.51449008 | 0.7634174  |
| 425 | 0.1021937  | 0.10413067 | 0.14108339 | 0.14323246 | 0.18937638 | 0.24920473 | 0.50971838 | 0.75678331 |
| 426 | 0.10040984 | 0.10211018 | 0.13837601 | 0.14105634 | 0.18592629 | 0.24407715 | 0.50396061 | 0.74882671 |
| 427 | 0.0998241  | 0.10165883 | 0.13703961 | 0.13920638 | 0.18293467 | 0.24208722 | 0.49927926 | 0.74298175 |
| 428 | 0.09831939 | 0.09914095 | 0.1349784  | 0.13687944 | 0.18094588 | 0.23954585 | 0.4950876  | 0.73787891 |
| 429 | 0.09728966 | 0.0977327  | 0.13301834 | 0.13501397 | 0.17809427 | 0.23519791 | 0.4899727  | 0.73159055 |
| 430 | 0.09569081 | 0.09688341 | 0.13143195 | 0.1339958  | 0.17601938 | 0.23207794 | 0.48702623 | 0.72608939 |
| 431 | 0.09492711 | 0.09588087 | 0.13011033 | 0.13164126 | 0.17371394 | 0.22865948 | 0.48222631 | 0.7211961  |
| 432 | 0.09420572 | 0.09555928 | 0.12994508 | 0.13060631 | 0.17261779 | 0.22701708 | 0.48072343 | 0.71778585 |
| 433 | 0.09432388 | 0.09535475 | 0.12989882 | 0.13078234 | 0.17234323 | 0.22731311 | 0.47919956 | 0.71603426 |
| 434 | 0.09367517 | 0.0951325  | 0.12901702 | 0.12921583 | 0.17017027 | 0.22492941 | 0.47588963 | 0.71200802 |
| 435 | 0.09266552 | 0.09419061 | 0.12732114 | 0.12788803 | 0.16823194 | 0.22269499 | 0.47281621 | 0.70787246 |
| 436 | 0.09216476 | 0.09322605 | 0.12631383 | 0.12633707 | 0.16631114 | 0.2206893  | 0.46877407 | 0.6992133  |
| 437 | 0.09136167 | 0.09251555 | 0.12478821 | 0.12507658 | 0.16448764 | 0.21838031 | 0.46605518 | 0.6942339  |
| 438 | 0.09006437 | 0.09083082 | 0.12301244 | 0.12291211 | 0.16245576 | 0.21550036 | 0.46125166 | 0.68760471 |
| 439 | 0.08902894 | 0.08935797 | 0.12216062 | 0.12166953 | 0.15879449 | 0.21238936 | 0.45777354 | 0.68273291 |
| 440 | 0.08765517 | 0.08860907 | 0.1203159  | 0.11936016 | 0.15733521 | 0.20888787 | 0.45221791 | 0.67534102 |
| 441 | 0.08678396 | 0.08743255 | 0.11884482 | 0.11806441 | 0.15513967 | 0.2066113  | 0.44840361 | 0.66965524 |
| 442 | 0.08545268 | 0.0863228  | 0.11797548 | 0.11607468 | 0.15292115 | 0.20357763 | 0.44437842 | 0.664813   |
| 443 | 0.08415661 | 0.08535594 | 0.11549973 | 0.11414311 | 0.15024474 | 0.20054089 | 0.43925549 | 0.65866442 |
| 444 | 0.08326188 | 0.08400849 | 0.11473208 | 0.11294222 | 0.14789773 | 0.19803476 | 0.43610854 | 0.65308399 |
| 445 | 0.08229917 | 0.08328452 | 0.11315916 | 0.11107785 | 0.14604276 | 0.19504658 | 0.4321576  | 0.64738148 |

**Table S15. UV-vis absorption spectroscopic titration of Trp-Gly-Trp with 6b**

| Wavelength (nm) | Trp-Gly-Trp 5mM | Trp-Gly-Trp 5mM + 6b 1mM | Trp-Gly-Trp 5mM + 6b 2mM | Trp-Gly-Trp 5mM + 6b 3mM | Trp-Gly-Trp 5mM + 6b 4mM | Trp-Gly-Trp 5mM + 6b 5mM | Trp-Gly-Trp 5mM + 6b 6mM | Trp-Gly-Trp 5mM + 6b 10mM |
|-----------------|-----------------|--------------------------|--------------------------|--------------------------|--------------------------|--------------------------|--------------------------|---------------------------|
| 375             | 0.22917521      | 0.65375268               | 0.87271697               | 1.17313321               | 1.42671796               | 1.63531769               | 1.86053021               | 1.90861444                |
| 376             | 0.22979401      | 0.64327257               | 0.8585283                | 1.15073713               | 1.43244674               | 1.6016259                | 1.86512195               | 1.90066471                |
| 377             | 0.23042404      | 0.63520333               | 0.84682563               | 1.13853286               | 1.42195259               | 1.58723714               | 1.85449282               | 1.88917468                |
| 378             | 0.23324373      | 0.62985714               | 0.83388675               | 1.12756194               | 1.40567854               | 1.57672135               | 1.83884171               | 1.87703091                |
| 379             | 0.23999015      | 0.62495674               | 0.82637675               | 1.11947136               | 1.40465246               | 1.56693456               | 1.83929143               | 1.87195632                |
| 380             | 0.24104346      | 0.59077045               | 0.81669314               | 1.10944123               | 1.39267858               | 1.5551748                | 1.82628938               | 1.85589304                |
| 381             | 0.24310993      | 0.58379733               | 0.80515556               | 1.09605614               | 1.38690094               | 1.53809647               | 1.82070679               | 1.84939705                |
| 382             | 0.24907834      | 0.58139713               | 0.79864111               | 1.08438648               | 1.3815369                | 1.51966242               | 1.8112121                | 1.84233173                |
| 383             | 0.25571251      | 0.577576                 | 0.79310669               | 1.07243869               | 1.38253035               | 1.49965375               | 1.80857694               | 1.83959149                |
| 384             | 0.26322913      | 0.57804421               | 0.79193233               | 1.07064794               | 1.38168743               | 1.49699965               | 1.8072932                | 1.84212034                |
| 385             | 0.27169168      | 0.5788075                | 0.79050108               | 1.07340761               | 1.3728293                | 1.50433079               | 1.79986117               | 1.83797356                |
| 386             | 0.28029759      | 0.57899859               | 0.78762857               | 1.07428864               | 1.37154926               | 1.50908685               | 1.80238869               | 1.83962152                |
| 387             | 0.28746391      | 0.58054984               | 0.78983672               | 1.0783616                | 1.36402763               | 1.51558626               | 1.80156289               | 1.84317838                |
| 388             | 0.29166327      | 0.57949138               | 0.78634679               | 1.07053228               | 1.35210415               | 1.50233795               | 1.80443241               | 1.83908151                |
| 389             | 0.29486786      | 0.57816414               | 0.76169539               | 1.08030923               | 1.39310228               | 1.54789142               | 1.80010774               | 1.83812312                |
| 390             | 0.29752549      | 0.57928859               | 0.76183842               | 1.07804405               | 1.38861512               | 1.54290569               | 1.79263497               | 1.83902153                |
| 391             | 0.30078513      | 0.5776499                | 0.79818245               | 1.10120636               | 1.40047219               | 1.55608021               | 1.76850493               | 1.83262359                |
| 392             | 0.30296605      | 0.60365244               | 0.79579045               | 1.10394671               | 1.40789771               | 1.56433079               | 1.77944738               | 1.82024718                |
| 393             | 0.3045831       | 0.59741709               | 0.77467004               | 1.09655606               | 1.41268569               | 1.56965077               | 1.80606883               | 1.84402665                |
| 394             | 0.30639965      | 0.59330144               | 0.7708457                | 1.09118666               | 1.40579632               | 1.56199591               | 1.79772972               | 1.85726648                |
| 395             | 0.33474931      | 0.58702568               | 0.7634073                | 1.08147612               | 1.39380676               | 1.54867418               | 1.79650474               | 1.84402665                |
| 396             | 0.32855223      | 0.58065564               | 0.75448733               | 1.07371408               | 1.38689978               | 1.54099975               | 1.77926447               | 1.84049298                |
| 397             | 0.32501676      | 0.57249764               | 0.74607106               | 1.06419282               | 1.37615451               | 1.52906056               | 1.77549285               | 1.83929143                |
| 398             | 0.31787749      | 0.56519169               | 0.73811885               | 1.04980971               | 1.35563689               | 1.50626321               | 1.77065098               | 1.83812312                |
| 399             | 0.31432185      | 0.55483188               | 0.72737876               | 1.04404442               | 1.35420994               | 1.50467771               | 1.75639154               | 1.8305019                 |
| 400             | 0.30953367      | 0.5467826                | 0.71897348               | 1.06052699               | 1.39348889               | 1.54832099               | 1.75291093               | 1.82182911                |
| 401             | 0.30455596      | 0.53741933               | 0.7090821                | 1.04461002               | 1.37176523               | 1.52418359               | 1.73478109               | 1.8155073                 |
| 402             | 0.29733429      | 0.52754489               | 0.69713465               | 1.03060676               | 1.35557418               | 1.50619353               | 1.73167948               | 1.80429404                |
| 403             | 0.29355789      | 0.51932775               | 0.68711419               | 1.02001158               | 1.34420636               | 1.49356262               | 1.71749118               | 1.79783875                |
| 404             | 0.28869818      | 0.51118286               | 0.67875173               | 1.00941968               | 1.33135265               | 1.47928073               | 1.71372323               | 1.79169302                |
| 405             | 0.28400001      | 0.50338995               | 0.66911364               | 0.99872877               | 1.3194565                | 1.46606277               | 1.70304978               | 1.78502378                |
| 406             | 0.27914802      | 0.49595754               | 0.6622114                | 0.98885519               | 1.30667071               | 1.45185635               | 1.69695523               | 1.78375491                |
| 407             | 0.27390637      | 0.48727558               | 0.65468901               | 0.98356763               | 1.30326705               | 1.4480745                | 1.68621713               | 1.77528571                |
| 408             | 0.27102562      | 0.47826973               | 0.64732364               | 0.97513961               | 1.29367948               | 1.43742165               | 1.68327502               | 1.76664846                |
| 409             | 0.2667666       | 0.47206478               | 0.63919651               | 0.97062748               | 1.2923121                | 1.43590234               | 1.67670666               | 1.7544133                 |
| 410             | 0.26201902      | 0.46702152               | 0.63349485               | 0.96430241               | 1.28527349               | 1.42808165               | 1.66302024               | 1.75195312                |
| 411             | 0.26127728      | 0.46496426               | 0.63041681               | 0.96391598               | 1.2873002                | 1.43033355               | 1.6647628                | 1.75187956                |
| 412             | 0.25938153      | 0.46154694               | 0.62720395               | 0.9672079                | 1.29652577               | 1.44058419               | 1.66562669               | 1.74960441                |
| 413             | 0.25572422      | 0.457248                 | 0.62157122               | 0.97214718               | 1.31109891               | 1.45677656               | 1.65327548               | 1.74227345                |
| 414             | 0.25189112      | 0.45145338               | 0.61545662               | 0.97306117               | 1.31836068               | 1.4648452                | 1.646103                 | 1.73511139                |
| 415             | 0.24899819      | 0.44749602               | 0.60968145               | 0.97246797               | 1.32241694               | 1.46935216               | 1.64677641               | 1.7310478                 |
| 416             | 0.24511908      | 0.44170675               | 0.60347113               | 0.97090241               | 1.32499394               | 1.47221549               | 1.63292376               | 1.72264296                |
| 417             | 0.23994715      | 0.4345028                | 0.59548787               | 0.96841943               | 1.32740134               | 1.47489038               | 1.62718002               | 1.71213113                |
| 418             | 0.23645448      | 0.42919444               | 0.58943701               | 0.96623283               | 1.32863987               | 1.47626653               | 1.62267555               | 1.70665953                |
| 419             | 0.23101651      | 0.42311641               | 0.57902161               | 0.95665954               | 1.31959373               | 1.46621525               | 1.61177443               | 1.69568183                |
| 420             | 0.2279924       | 0.41744806               | 0.57184737               | 0.94536067               | 1.30431032               | 1.44923369               | 1.60479596               | 1.6904763                 |
| 421             | 0.22363374      | 0.41194801               | 0.56500502               | 0.93954804               | 1.29928433               | 1.44364925               | 1.59328954               | 1.67914777                |
| 422             | 0.21965175      | 0.40629311               | 0.55876532               | 0.9323915                | 1.29113014               | 1.43458904               | 1.58611375               | 1.66985014                |
| 423             | 0.21620927      | 0.40090547               | 0.55432731               | 0.92195295               | 1.27503949               | 1.41671054               | 1.58292709               | 1.66641169                |

|     |            |            |            |            |            |            |            |            |
|-----|------------|------------|------------|------------|------------|------------|------------|------------|
| 424 | 0.21248072 | 0.39607978 | 0.54760934 | 0.91248315 | 1.26286477 | 1.40318307 | 1.57118513 | 1.66011149 |
| 425 | 0.20951494 | 0.39168367 | 0.5422997  | 0.90475793 | 1.25277931 | 1.39197701 | 1.5630903  | 1.64831962 |
| 426 | 0.20600787 | 0.38683178 | 0.53645339 | 0.89972707 | 1.24836108 | 1.38706786 | 1.56223358 | 1.64600689 |
| 427 | 0.20158074 | 0.38258233 | 0.53185065 | 0.89828862 | 1.24973583 | 1.38859537 | 1.55470723 | 1.63812113 |
| 428 | 0.19973323 | 0.37867516 | 0.52775858 | 0.89556103 | 1.24817051 | 1.38685613 | 1.54313314 | 1.63513022 |
| 429 | 0.19668289 | 0.37559411 | 0.52372062 | 0.88913902 | 1.23944806 | 1.37716451 | 1.54243599 | 1.62937588 |
| 430 | 0.19407727 | 0.37222566 | 0.51964517 | 0.88608857 | 1.23724658 | 1.37471842 | 1.53742233 | 1.62517836 |
| 431 | 0.19209239 | 0.36951113 | 0.51485658 | 0.88335345 | 1.23629366 | 1.37365962 | 1.52840029 | 1.61995165 |
| 432 | 0.19157498 | 0.3670156  | 0.51343494 | 0.8829624  | 1.23682072 | 1.37424525 | 1.52537585 | 1.61648983 |
| 433 | 0.19061877 | 0.3660591  | 0.51160442 | 0.8815827  | 1.23581348 | 1.37312609 | 1.52303801 | 1.61825335 |
| 434 | 0.18856104 | 0.36397271 | 0.50925094 | 0.87777082 | 1.23059716 | 1.36733018 | 1.51931771 | 1.61214764 |
| 435 | 0.18643502 | 0.3601053  | 0.50563807 | 0.87413555 | 1.2268541  | 1.36317122 | 1.51578559 | 1.6079893  |
| 436 | 0.18482352 | 0.35786704 | 0.50182593 | 0.86848914 | 1.21942075 | 1.35491194 | 1.50606817 | 1.60188629 |
| 437 | 0.18316568 | 0.3542742  | 0.49879692 | 0.86507221 | 1.21557233 | 1.35063592 | 1.50302884 | 1.59698248 |
| 438 | 0.18020479 | 0.35090183 | 0.4935031  | 0.85852893 | 1.20774681 | 1.3419409  | 1.49165887 | 1.5879765  |
| 439 | 0.17740176 | 0.34680194 | 0.48845486 | 0.85088874 | 1.1975897  | 1.33065522 | 1.48714225 | 1.58603004 |
| 440 | 0.17523851 | 0.34280357 | 0.48387067 | 0.84222149 | 1.18503877 | 1.31670974 | 1.47627956 | 1.57613182 |
| 441 | 0.17260292 | 0.33770881 | 0.47921134 | 0.83830986 | 1.18170578 | 1.31300642 | 1.4705825  | 1.56770431 |
| 442 | 0.17020302 | 0.33366737 | 0.47477634 | 0.8341041  | 1.17760497 | 1.30844997 | 1.46007123 | 1.56629415 |
| 443 | 0.16705064 | 0.32904392 | 0.46884565 | 0.82853081 | 1.17221898 | 1.30246554 | 1.45497758 | 1.55511244 |
| 444 | 0.16472554 | 0.32524631 | 0.4631664  | 0.82699842 | 1.17438184 | 1.30486871 | 1.4427094  | 1.54282991 |
| 445 | 0.16303503 | 0.32173391 | 0.45880905 | 0.82048075 | 1.16576277 | 1.29529197 | 1.43784994 | 1.54245114 |
